# Supplementary material for: WNP: A Novel Algorithm for Gene Products Annotation from Weighted Functional Networks
Source: PLoS One. 2012 Jun 28;7(6):e38767. doi: 10.1371/journal.pone.0038767 (PMC3386258; doi:10.1371/journal.pone.0038767)
Supplement: Table S2 — A list of all putative functional predictions made by WNP for Arabidopsis thaliana. (XLS) [file pone.0038767.s011.xls]

## Sheet: CC
ORF	GO ID	WPN Score	GO Term
AT1G02080	3	1	other intracellular components
AT2G02570	3	1	other intracellular components
AT1G54290	3	1	other intracellular components
AT1G34370	3	1	other intracellular components
AT2G03430	3	1	other intracellular components
AT2G35920	3	1	other intracellular components
AT1G02040	3	1	other intracellular components
AT2G14520	3	1	other intracellular components
AT4G26000	3	1	other intracellular components
AT1G80070	3	1	other intracellular components
AT2G04560	3	1	other intracellular components
ATCG00870	1	0.01	cytosol
ATCG00870	2	0.01	other cytoplasmic components
ATCG00870	3	0.01	other intracellular components
ATCG00870	6	0.03	nucleus
ATCG00870	5	0.05	plasma membrane
ATCG00870	4	0.02	other membranes
ATCG00870	9	0.12	cell wall
ATCG00870	8	0.09	plastid
ATCG00870	11	0.11	chloroplast
ATCG00870	16	0.08	ribosome
ATCG00870	13	0.08	extracellular
ATCG00870	14	0.11	mitochondria
ATCG00870	15	0.22	other cellular components
ATCG00870	7	0.05	Golgi apparatus
ATCG00870	12	0.01	ER
AT3G46220	3	1	other intracellular components
AT2G17900	3	1	other intracellular components
AT1G27050	4	1	other membranes
ATCG00900	3	1	other intracellular components
ATMG00490	1	0.02	cytosol
ATMG00490	2	0.1	other cytoplasmic components
ATMG00490	3	0.09	other intracellular components
ATMG00490	5	0.05	plasma membrane
ATMG00490	4	0.02	other membranes
ATMG00490	9	0.11	cell wall
ATMG00490	8	0.07	plastid
ATMG00490	11	0.08	chloroplast
ATMG00490	16	0.02	ribosome
ATMG00490	13	0.05	extracellular
ATMG00490	14	0.08	mitochondria
ATMG00490	15	0.07	other cellular components
ATMG00490	7	0.13	Golgi apparatus
ATMG00490	12	0.11	ER
ATMG00410	3	1	other intracellular components
AT2G38210	3	1	other intracellular components
AT3G53630	1	0.04	cytosol
AT3G53630	2	0.02	other cytoplasmic components
AT3G53630	3	0.02	other intracellular components
AT3G53630	6	0.02	nucleus
AT3G53630	5	0.1	plasma membrane
AT3G53630	4	0.36	other membranes
AT3G53630	9	0.03	cell wall
AT3G53630	8	0.06	plastid
AT3G53630	11	0.06	chloroplast
AT3G53630	16	0.04	ribosome
AT3G53630	13	0.08	extracellular
AT3G53630	14	0.06	mitochondria
AT3G53630	15	0.03	other cellular components
AT3G53630	7	0.06	Golgi apparatus
AT3G53630	12	0.02	ER
AT1G55710	1	0.04	cytosol
AT1G55710	2	0.02	other cytoplasmic components
AT1G55710	3	0.02	other intracellular components
AT1G55710	6	0.02	nucleus
AT1G55710	5	0.1	plasma membrane
AT1G55710	4	0.36	other membranes
AT1G55710	9	0.03	cell wall
AT1G55710	8	0.06	plastid
AT1G55710	11	0.06	chloroplast
AT1G55710	16	0.04	ribosome
AT1G55710	13	0.08	extracellular
AT1G55710	14	0.06	mitochondria
AT1G55710	15	0.03	other cellular components
AT1G55710	7	0.06	Golgi apparatus
AT1G55710	12	0.02	ER
AT1G63740	4	1	other membranes
ATCG01000	1	0.01	cytosol
ATCG01000	2	0.09	other cytoplasmic components
ATCG01000	3	0.08	other intracellular components
ATCG01000	6	0.06	nucleus
ATCG01000	5	0.02	plasma membrane
ATCG01000	4	0.07	other membranes
ATCG01000	9	0.01	cell wall
ATCG01000	8	0.11	plastid
ATCG01000	11	0.21	chloroplast
ATCG01000	16	0.16	ribosome
ATCG01000	13	0.07	extracellular
ATCG01000	14	0.04	mitochondria
ATCG01000	15	0.02	other cellular components
ATCG01000	7	0.04	Golgi apparatus
ATCG01000	12	0.01	ER
AT1G60620	3	1	other intracellular components
AT1G56540	4	1	other membranes
ATMG00170	1	0.04	cytosol
ATMG00170	2	0.01	other cytoplasmic components
ATMG00170	3	0.54	other intracellular components
ATMG00170	6	0.01	nucleus
ATMG00170	5	0.02	plasma membrane
ATMG00170	4	0.02	other membranes
ATMG00170	9	0.02	cell wall
ATMG00170	8	0.03	plastid
ATMG00170	11	0.06	chloroplast
ATMG00170	16	0.05	ribosome
ATMG00170	13	0.04	extracellular
ATMG00170	14	0.04	mitochondria
ATMG00170	15	0.04	other cellular components
ATMG00170	7	0.02	Golgi apparatus
ATMG00170	12	0.06	ER
AT4G16950	4	1	other membranes
AT4G08685	3	1	other intracellular components
AT5G07590	3	1	other intracellular components
AT2G23070	3	1	other intracellular components
AT1G29940	3	1	other intracellular components
AT4G31480	3	1	other intracellular components
AT5G48770	4	1	other membranes
AT2G46580	3	1	other intracellular components
AT4G16860	4	1	other membranes
AT3G12860	3	1	other intracellular components
AT5G38350	4	1	other membranes
AT4G14230	3	1	other intracellular components
AT5G45140	3	1	other intracellular components
AT1G48100	2	0.01	other cytoplasmic components
AT1G48100	3	0.78	other intracellular components
AT1G48100	6	0.18	nucleus
AT1G48100	11	0.03	chloroplast
AT1G24706	3	1	other intracellular components
AT4G04940	3	1	other intracellular components
AT1G09020	3	1	other intracellular components
AT2G40360	3	1	other intracellular components
AT3G10400	3	1	other intracellular components
AT3G53730	3	1	other intracellular components
AT3G45930	3	1	other intracellular components
AT1G09200	3	1	other intracellular components
AT1G07820	3	1	other intracellular components
AT1G03360	3	1	other intracellular components
AT2G23840	3	1	other intracellular components
AT1G19270	4	1	other membranes
AT4G14240	3	1	other intracellular components
AT1G53900	3	1	other intracellular components
AT1G53880	3	1	other intracellular components
AT2G27120	3	1	other intracellular components
AT4G12400	3	1	other intracellular components
AT4G19510	4	1	other membranes
AT2G37470	3	1	other intracellular components
AT4G09670	3	1	other intracellular components
AT3G15460	3	1	other intracellular components
AT2G44510	3	1	other intracellular components
AT1G04170	3	1	other intracellular components
AT4G28200	3	1	other intracellular components
AT3G06670	3	1	other intracellular components
AT3G60240	3	1	other intracellular components
AT3G51730	3	1	other intracellular components
AT4G19770	3	0.11	other intracellular components
AT4G19770	15	0.89	other cellular components
AT3G23660	3	1	other intracellular components
AT3G06810	3	1	other intracellular components
AT2G39830	4	1	other membranes
AT1G13160	3	1	other intracellular components
AT5G10980	3	1	other intracellular components
AT4G40040	3	1	other intracellular components
AT4G40030	3	1	other intracellular components
AT3G22660	3	1	other intracellular components
AT2G40780	3	1	other intracellular components
AT2G04520	3	1	other intracellular components
AT1G03330	3	1	other intracellular components
AT1G49540	3	1	other intracellular components
AT1G52930	3	1	other intracellular components
AT2G03780	3	1	other intracellular components
AT2G16940	3	1	other intracellular components
AT1G29630	3	1	other intracellular components
AT1G18090	3	1	other intracellular components
AT4G11820	3	1	other intracellular components
AT3G05060	3	1	other intracellular components
AT5G11500	3	1	other intracellular components
AT1G06080	3	1	other intracellular components
AT1G14640	3	1	other intracellular components
AT4G36860	4	1	other membranes
AT3G11890	1	0.01	cytosol
AT3G11890	2	0.01	other cytoplasmic components
AT3G11890	3	0.86	other intracellular components
AT3G11890	5	0.04	plasma membrane
AT3G11890	4	0.02	other membranes
AT3G11890	8	0.04	plastid
AT3G11890	11	0.01	chloroplast
AT3G11890	14	0.01	mitochondria
AT1G16030	3	1	other intracellular components
AT3G59650	3	1	other intracellular components
AT3G48380	3	0.74	other intracellular components
AT3G48380	6	0.23	nucleus
AT3G48380	5	0.02	plasma membrane
AT3G48380	11	0.01	chloroplast
AT4G24490	3	1	other intracellular components
AT1G61040	3	1	other intracellular components
AT2G21270	3	1	other intracellular components
AT3G53650	3	1	other intracellular components
AT3G01340	3	1	other intracellular components
AT2G31410	3	1	other intracellular components
AT4G34910	3	1	other intracellular components
AT2G05630	3	1	other intracellular components
AT3G13940	3	1	other intracellular components
AT1G10930	3	1	other intracellular components
AT2G28860	3	1	other intracellular components
AT1G51730	3	1	other intracellular components
AT3G06400	3	1	other intracellular components
AT2G32070	3	1	other intracellular components
AT2G46230	3	1	other intracellular components
AT2G17980	3	1	other intracellular components
AT3G58560	3	1	other intracellular components
AT3G57300	3	1	other intracellular components
AT1G28060	3	1	other intracellular components
AT1G27752	3	1	other intracellular components
AT2G38700	3	1	other intracellular components
AT3G16840	3	1	other intracellular components
AT2G11000	3	1	other intracellular components
AT1G21500	3	1	other intracellular components
AT5G50870	3	1	other intracellular components
AT4G21660	3	1	other intracellular components
AT1G79730	3	1	other intracellular components
AT1G61700	3	1	other intracellular components
AT3G56640	3	1	other intracellular components
AT2G18220	3	1	other intracellular components
AT2G34970	3	1	other intracellular components
AT5G48640	3	1	other intracellular components
AT5G43500	3	1	other intracellular components
AT2G20560	3	1	other intracellular components
AT3G01160	3	1	other intracellular components
AT3G25100	3	1	other intracellular components
AT1G60170	3	1	other intracellular components
AT3G20670	3	1	other intracellular components
AT1G07350	3	1	other intracellular components
AT1G53570	3	1	other intracellular components
AT5G13680	3	1	other intracellular components
AT3G21720	3	1	other intracellular components
AT1G31970	3	1	other intracellular components
AT1G63810	3	1	other intracellular components
AT3G13970	3	1	other intracellular components
AT1G65560	3	1	other intracellular components
AT3G07760	1	0.01	cytosol
AT3G07760	2	0.01	other cytoplasmic components
AT3G07760	3	0.86	other intracellular components
AT3G07760	5	0.04	plasma membrane
AT3G07760	4	0.02	other membranes
AT3G07760	8	0.04	plastid
AT3G07760	11	0.01	chloroplast
AT3G07760	14	0.01	mitochondria
AT1G68650	3	1	other intracellular components
AT5G10960	3	1	other intracellular components
AT1G10490	3	1	other intracellular components
AT1G13950	3	1	other intracellular components
AT2G34050	3	1	other intracellular components
AT4G37280	3	1	other intracellular components
AT4G16710	3	1	other intracellular components
AT1G66800	3	1	other intracellular components
AT4G18905	3	1	other intracellular components
AT3G42179	1	0.05	cytosol
AT3G42179	2	0.04	other cytoplasmic components
AT3G42179	3	0.02	other intracellular components
AT3G42179	6	0.05	nucleus
AT3G42179	5	0.11	plasma membrane
AT3G42179	4	0.03	other membranes
AT3G42179	9	0.08	cell wall
AT3G42179	8	0.06	plastid
AT3G42179	11	0.05	chloroplast
AT3G42179	16	0.05	ribosome
AT3G42179	13	0.14	extracellular
AT3G42179	14	0.12	mitochondria
AT3G42179	15	0.12	other cellular components
AT3G42179	7	0.03	Golgi apparatus
AT3G42179	12	0.05	ER
AT3G16990	3	0.8	other intracellular components
AT3G16990	6	0.06	nucleus
AT3G16990	5	0.01	plasma membrane
AT3G16990	4	0.03	other membranes
AT3G16990	9	0.03	cell wall
AT3G16990	8	0.03	plastid
AT3G16990	11	0.02	chloroplast
AT3G16990	13	0.01	extracellular
AT3G16990	15	0.01	other cellular components
AT1G69485	3	1	other intracellular components
AT1G08840	3	1	other intracellular components
AT1G07600	3	1	other intracellular components
AT1G04900	3	1	other intracellular components
AT1G50010	3	1	other intracellular components
AT4G32640	3	1	other intracellular components
AT3G44340	3	1	other intracellular components
AT3G07100	3	1	other intracellular components
AT2G10440	3	1	other intracellular components
AT3G23620	3	1	other intracellular components
AT1G10580	3	1	other intracellular components
AT1G08780	3	1	other intracellular components
AT3G23900	3	1	other intracellular components
AT1G63660	3	1	other intracellular components
AT4G27130	3	1	other intracellular components
AT2G40430	3	1	other intracellular components
AT5G47430	3	1	other intracellular components
AT1G60430	3	1	other intracellular components
AT3G07810	3	1	other intracellular components
AT3G62580	3	1	other intracellular components
AT1G59760	3	1	other intracellular components
AT1G05120	3	1	other intracellular components
AT1G69070	3	1	other intracellular components
AT3G45630	3	1	other intracellular components
AT3G09780	5	1	plasma membrane
AT3G26618	3	1	other intracellular components
AT4G27650	3	1	other intracellular components
AT2G04660	3	1	other intracellular components
AT3G58390	3	1	other intracellular components
AT1G20970	3	1	other intracellular components
AT4G37760	3	1	other intracellular components
AT1G73530	3	1	other intracellular components
AT1G13120	3	1	other intracellular components
AT1G03350	3	1	other intracellular components
AT3G06580	3	1	other intracellular components
AT1G72100	2	0.05	other cytoplasmic components
AT1G72100	3	0.35	other intracellular components
AT1G72100	6	0.02	nucleus
AT1G72100	5	0.08	plasma membrane
AT1G72100	4	0.05	other membranes
AT1G72100	9	0.01	cell wall
AT1G72100	8	0.02	plastid
AT1G72100	11	0.08	chloroplast
AT1G72100	16	0.06	ribosome
AT1G72100	13	0.03	extracellular
AT1G72100	14	0.04	mitochondria
AT1G72100	15	0.16	other cellular components
AT1G72100	7	0.05	Golgi apparatus
AT1G29970	3	1	other intracellular components
ATCG00065	3	1	other intracellular components
AT2G36370	6	1	nucleus
AT5G25757	3	1	other intracellular components
AT5G25754	3	1	other intracellular components
AT3G07300	3	1	other intracellular components
AT4G33666	3	1	other intracellular components
AT1G73840	3	1	other intracellular components
AT4G13860	3	1	other intracellular components
AT3G54250	3	1	other intracellular components
AT3G52590	3	1	other intracellular components
AT4G04210	3	1	other intracellular components
AT5G28740	3	1	other intracellular components
AT1G23100	3	1	other intracellular components
AT2G41790	3	1	other intracellular components
AT2G37770	3	1	other intracellular components
AT2G37990	3	1	other intracellular components
AT3G59630	3	1	other intracellular components
AT2G06040	3	1	other intracellular components
AT2G31360	3	1	other intracellular components
AT4G39220	3	1	other intracellular components
AT4G11240	3	1	other intracellular components
AT2G19385	3	1	other intracellular components
AT1G11650	3	1	other intracellular components
AT3G13180	5	1	plasma membrane
AT1G17680	3	1	other intracellular components
AT5G46920	3	1	other intracellular components
AT1G16350	3	1	other intracellular components
AT1G55790	3	1	other intracellular components
AT4G14300	3	1	other intracellular components
AT1G50030	3	1	other intracellular components
AT3G59410	3	1	other intracellular components
AT1G71820	3	1	other intracellular components
AT1G67500	3	1	other intracellular components
AT2G40700	3	1	other intracellular components
AT1G33470	3	1	other intracellular components
AT4G25120	3	1	other intracellular components
AT5G19440	3	1	other intracellular components
AT4G35420	3	1	other intracellular components
AT1G63340	3	1	other intracellular components
AT4G18010	3	1	other intracellular components
AT3G60360	3	1	other intracellular components
AT5G08420	3	1	other intracellular components
AT3G05000	3	1	other intracellular components
AT5G06680	3	1	other intracellular components
AT2G34570	3	1	other intracellular components
AT1G03000	3	1	other intracellular components
AT5G54750	3	1	other intracellular components
AT1G12270	3	1	other intracellular components
AT4G16630	3	1	other intracellular components
AT5G17330	3	1	other intracellular components
AT4G02860	3	1	other intracellular components
AT4G39830	3	1	other intracellular components
AT1G23280	3	1	other intracellular components
AT2G34500	3	1	other intracellular components
AT2G21440	3	1	other intracellular components
AT1G54650	3	1	other intracellular components
AT2G25355	3	1	other intracellular components
AT4G29510	3	1	other intracellular components
AT4G11640	3	1	other intracellular components
AT5G35080	3	1	other intracellular components
AT1G03110	3	1	other intracellular components
AT2G18510	3	1	other intracellular components
AT2G43360	3	1	other intracellular components
AT1G25520	3	1	other intracellular components
AT1G49760	3	1	other intracellular components
AT1G51710	3	1	other intracellular components
AT3G16190	3	1	other intracellular components
AT2G03820	3	1	other intracellular components
AT5G02150	3	1	other intracellular components
AT1G04230	3	1	other intracellular components
AT1G50370	3	1	other intracellular components
AT5G09880	3	1	other intracellular components
AT4G14160	3	1	other intracellular components
AT4G04910	3	1	other intracellular components
AT3G61960	5	1	plasma membrane
AT3G18520	3	1	other intracellular components
AT3G07890	3	1	other intracellular components
AT2G32260	3	1	other intracellular components
AT2G28360	3	1	other intracellular components
AT1G66500	3	1	other intracellular components
AT1G07270	3	1	other intracellular components
AT1G07140	3	1	other intracellular components
AT5G24840	3	1	other intracellular components
AT1G06900	3	1	other intracellular components
AT1G28330	3	1	other intracellular components
AT3G16680	6	1	nucleus
AT1G07470	3	1	other intracellular components
AT3G03340	3	1	other intracellular components
AT3G21300	3	1	other intracellular components
AT1G11240	3	1	other intracellular components
AT5G09550	3	1	other intracellular components
AT3G20790	3	1	other intracellular components
AT1G35910	3	1	other intracellular components
AT2G45630	3	1	other intracellular components
AT4G10790	3	1	other intracellular components
AT1G47490	3	1	other intracellular components
AT1G31660	3	1	other intracellular components
AT1G51690	3	1	other intracellular components
AT1G07840	3	1	other intracellular components
AT2G43650	3	1	other intracellular components
AT3G56510	3	1	other intracellular components
AT3G54690	3	1	other intracellular components
AT1G12650	3	1	other intracellular components
AT4G15770	3	1	other intracellular components
AT2G42120	3	1	other intracellular components
AT4G20030	3	1	other intracellular components
AT4G01810	3	1	other intracellular components
AT1G30070	3	1	other intracellular components
AT1G03270	3	1	other intracellular components
AT1G68020	3	1	other intracellular components
AT1G79150	3	1	other intracellular components
AT5G09860	3	1	other intracellular components
AT1G51410	3	1	other intracellular components
AT2G22400	3	1	other intracellular components
AT1G14360	3	1	other intracellular components
AT5G10830	3	1	other intracellular components
AT4G19610	3	1	other intracellular components
AT1G27290	3	1	other intracellular components
AT1G60770	3	1	other intracellular components
AT3G12380	3	1	other intracellular components
AT1G19340	3	1	other intracellular components
AT1G73320	3	1	other intracellular components
AT1G69410	3	1	other intracellular components
AT1G72240	3	1	other intracellular components
AT1G15010	3	1	other intracellular components
AT1G05460	3	1	other intracellular components
AT1G64600	3	1	other intracellular components
AT1G61800	3	1	other intracellular components
AT5G61770	3	1	other intracellular components
AT1G06790	3	1	other intracellular components
AT1G19120	3	1	other intracellular components
AT1G48130	3	1	other intracellular components
AT1G22270	3	1	other intracellular components
AT3G08930	3	1	other intracellular components
AT5G01460	3	1	other intracellular components
AT1G09870	3	1	other intracellular components
AT1G78190	3	1	other intracellular components
AT3G52580	3	1	other intracellular components
AT1G28080	3	1	other intracellular components
AT2G20690	3	1	other intracellular components
AT3G12050	3	1	other intracellular components
AT1G04080	3	1	other intracellular components
AT3G19130	3	1	other intracellular components
AT3G09720	3	1	other intracellular components
AT4G02690	3	1	other intracellular components
AT1G03070	3	1	other intracellular components
AT1G65970	3	1	other intracellular components
AT1G60740	3	1	other intracellular components
AT3G24080	3	1	other intracellular components
AT1G20590	6	1	nucleus
AT1G58440	3	1	other intracellular components
AT5G23680	1	0.01	cytosol
AT5G23680	2	0.01	other cytoplasmic components
AT5G23680	3	0.86	other intracellular components
AT5G23680	5	0.04	plasma membrane
AT5G23680	4	0.02	other membranes
AT5G23680	8	0.04	plastid
AT5G23680	11	0.01	chloroplast
AT5G23680	14	0.01	mitochondria
AT3G07170	1	0.01	cytosol
AT3G07170	2	0.01	other cytoplasmic components
AT3G07170	3	0.86	other intracellular components
AT3G07170	5	0.04	plasma membrane
AT3G07170	4	0.02	other membranes
AT3G07170	8	0.04	plastid
AT3G07170	11	0.01	chloroplast
AT3G07170	14	0.01	mitochondria
AT1G70180	1	0.01	cytosol
AT1G70180	2	0.01	other cytoplasmic components
AT1G70180	3	0.86	other intracellular components
AT1G70180	5	0.04	plasma membrane
AT1G70180	4	0.02	other membranes
AT1G70180	8	0.04	plastid
AT1G70180	11	0.01	chloroplast
AT1G70180	14	0.01	mitochondria
AT5G10790	3	1	other intracellular components
AT1G06350	3	1	other intracellular components
AT1G12370	3	1	other intracellular components
AT2G47420	3	1	other intracellular components
AT2G38710	3	1	other intracellular components
AT2G16790	3	1	other intracellular components
AT3G06740	3	1	other intracellular components
AT1G05940	3	1	other intracellular components
AT3G46030	3	1	other intracellular components
AT3G09480	3	1	other intracellular components
AT3G26420	3	1	other intracellular components
AT5G41190	3	1	other intracellular components
AT1G73430	3	1	other intracellular components
AT1G49880	3	1	other intracellular components
AT1G15020	3	1	other intracellular components
AT5G39770	3	1	other intracellular components
AT5G17570	3	1	other intracellular components
AT1G06120	3	1	other intracellular components
AT1G03280	3	1	other intracellular components
AT3G15353	3	1	other intracellular components
AT3G16380	3	1	other intracellular components
AT2G22870	3	1	other intracellular components
AT3G14100	3	1	other intracellular components
AT1G06360	3	1	other intracellular components
AT2G42270	3	1	other intracellular components
AT1G31910	3	1	other intracellular components
AT3G43810	3	1	other intracellular components
AT1G26530	3	1	other intracellular components
AT1G19020	3	1	other intracellular components
AT1G28480	3	1	other intracellular components
AT1G35190	3	1	other intracellular components
AT2G13370	3	1	other intracellular components
AT1G66510	3	1	other intracellular components
AT1G55130	3	1	other intracellular components
AT1G60070	3	1	other intracellular components
AT1G79400	3	1	other intracellular components
AT1G75140	3	0.08	other intracellular components
AT1G75140	6	0.9	nucleus
AT1G75140	4	0.02	other membranes
AT1G14650	3	1	other intracellular components
AT5G54900	3	1	other intracellular components
AT3G56450	3	1	other intracellular components
AT4G28480	3	1	other intracellular components
AT5G21274	3	1	other intracellular components
AT2G41110	3	1	other intracellular components
AT5G16730	3	0.03	other intracellular components
AT5G16730	9	0.02	cell wall
AT5G16730	8	0.01	plastid
AT5G16730	13	0.94	extracellular
AT4G24300	1	0.06	cytosol
AT4G24300	2	0.07	other cytoplasmic components
AT4G24300	3	0.09	other intracellular components
AT4G24300	6	0.05	nucleus
AT4G24300	5	0.04	plasma membrane
AT4G24300	4	0.11	other membranes
AT4G24300	9	0.09	cell wall
AT4G24300	8	0.14	plastid
AT4G24300	11	0.05	chloroplast
AT4G24300	16	0.02	ribosome
AT4G24300	13	0.08	extracellular
AT4G24300	14	0.09	mitochondria
AT4G24300	15	0.03	other cellular components
AT4G24300	7	0.05	Golgi apparatus
AT4G24300	12	0.03	ER
AT4G04423	3	1	other intracellular components
AT4G00895	5	1	plasma membrane
AT3G09390	3	1	other intracellular components
AT2G41490	3	1	other intracellular components
AT1G18310	3	1	other intracellular components
AT1G03687	3	1	other intracellular components
AT3G23175	1	0.08	cytosol
AT3G23175	2	0.02	other cytoplasmic components
AT3G23175	3	0.05	other intracellular components
AT3G23175	6	0.03	nucleus
AT3G23175	5	0.02	plasma membrane
AT3G23175	4	0.09	other membranes
AT3G23175	9	0.03	cell wall
AT3G23175	8	0.04	plastid
AT3G23175	11	0.14	chloroplast
AT3G23175	16	0.1	ribosome
AT3G23175	13	0.08	extracellular
AT3G23175	14	0.12	mitochondria
AT3G23175	15	0.1	other cellular components
AT3G23175	7	0.05	Golgi apparatus
AT3G23175	12	0.05	ER
AT1G15420	3	1	other intracellular components
AT3G60400	3	0.99	other intracellular components
AT3G60400	15	0.01	other cellular components
AT2G18330	3	1	other intracellular components
AT4G01920	3	1	other intracellular components
AT1G04880	3	0.51	other intracellular components
AT1G04880	6	0.49	nucleus
AT4G27680	3	1	other intracellular components
AT1G35617	3	1	other intracellular components
AT1G09150	3	1	other intracellular components
AT1G06090	3	1	other intracellular components
AT5G08630	3	1	other intracellular components
AT2G07340	3	1	other intracellular components
AT1G18380	3	1	other intracellular components
AT2G45730	3	1	other intracellular components
AT4G31420	3	1	other intracellular components
AT2G47310	3	1	other intracellular components
AT4G01790	3	1	other intracellular components
AT1G12440	6	1	nucleus
AT3G02030	3	1	other intracellular components
AT4G03140	3	1	other intracellular components
AT1G12790	3	1	other intracellular components
AT1G66740	3	1	other intracellular components
AT3G17360	3	1	other intracellular components
AT1G74250	3	1	other intracellular components
AT1G79470	3	1	other intracellular components
AT1G56060	3	1	other intracellular components
AT3G02320	3	1	other intracellular components
AT5G05450	3	1	other intracellular components
AT1G71370	3	1	other intracellular components
AT1G06100	3	1	other intracellular components
AT1G78410	3	1	other intracellular components
AT5G19120	15	1	other cellular components
AT3G04480	3	1	other intracellular components
AT1G14240	3	1	other intracellular components
AT1G65690	3	1	other intracellular components
AT3G62840	3	1	other intracellular components
AT1G31780	3	1	other intracellular components
AT5G15580	3	1	other intracellular components
AT1G33390	3	1	other intracellular components
AT3G01890	3	1	other intracellular components
AT3G04610	3	1	other intracellular components
AT5G09530	3	1	other intracellular components
AT1G73330	3	1	other intracellular components
AT1G09480	3	1	other intracellular components
AT1G74310	3	1	other intracellular components
AT1G27470	3	1	other intracellular components
AT5G06630	3	1	other intracellular components
AT2G24980	3	1	other intracellular components
AT4G34570	3	1	other intracellular components
AT1G64550	3	1	other intracellular components
AT3G05270	3	1	other intracellular components
AT3G48800	1	0.01	cytosol
AT3G48800	2	0.01	other cytoplasmic components
AT3G48800	3	0.86	other intracellular components
AT3G48800	5	0.04	plasma membrane
AT3G48800	4	0.02	other membranes
AT3G48800	8	0.04	plastid
AT3G48800	11	0.01	chloroplast
AT3G48800	14	0.01	mitochondria
AT1G24340	3	1	other intracellular components
AT2G42780	3	1	other intracellular components
AT3G12670	3	1	other intracellular components
AT1G73040	3	1	other intracellular components
AT5G41970	3	1	other intracellular components
AT5G20500	3	1	other intracellular components
AT4G19880	3	1	other intracellular components
AT1G09510	3	1	other intracellular components
AT1G67550	1	0.03	cytosol
AT1G67550	2	0.07	other cytoplasmic components
AT1G67550	3	0.16	other intracellular components
AT1G67550	6	0.01	nucleus
AT1G67550	4	0.56	other membranes
AT1G67550	8	0.01	plastid
AT1G67550	15	0.06	other cellular components
AT1G67550	7	0.02	Golgi apparatus
AT1G67550	12	0.08	ER
AT1G58410	3	1	other intracellular components
AT2G35020	3	1	other intracellular components
AT5G23740	3	1	other intracellular components
AT1G12640	3	1	other intracellular components
AT3G62940	3	1	other intracellular components
AT5G16200	3	1	other intracellular components
AT2G34357	3	1	other intracellular components
AT5G41360	3	1	other intracellular components
AT5G14600	3	1	other intracellular components
AT2G03870	3	1	other intracellular components
AT4G36690	3	1	other intracellular components
AT1G43810	3	1	other intracellular components
AT2G02000	3	1	other intracellular components
AT3G08000	3	1	other intracellular components
AT1G57600	3	1	other intracellular components
AT1G60710	3	1	other intracellular components
AT1G60680	3	1	other intracellular components
AT1G06640	3	1	other intracellular components
AT4G15020	3	1	other intracellular components
AT3G18790	3	1	other intracellular components
AT3G54590	3	1	other intracellular components
AT1G04980	3	1	other intracellular components
AT4G10040	3	1	other intracellular components
AT2G22690	3	1	other intracellular components
AT1G73980	3	1	other intracellular components
AT1G26190	3	1	other intracellular components
AT4G07410	3	1	other intracellular components
AT1G80780	3	1	other intracellular components
AT3G21500	3	1	other intracellular components
AT3G28550	3	1	other intracellular components
AT3G46490	3	1	other intracellular components
AT4G02330	3	1	other intracellular components
AT4G16765	3	1	other intracellular components
AT1G67070	3	1	other intracellular components
AT5G46840	3	1	other intracellular components
AT1G20440	3	1	other intracellular components
AT2G23080	3	1	other intracellular components
AT1G80190	3	1	other intracellular components
AT4G08400	3	1	other intracellular components
AT1G42440	3	1	other intracellular components
AT1G71350	3	1	other intracellular components
AT1G53165	5	1	plasma membrane
AT1G03370	3	1	other intracellular components
AT1G01930	3	1	other intracellular components
AT1G07400	3	1	other intracellular components
AT1G78770	3	1	other intracellular components
AT1G22210	3	1	other intracellular components
AT1G70590	3	1	other intracellular components
AT3G29160	3	1	other intracellular components
AT4G22150	3	1	other intracellular components
AT1G63050	3	1	other intracellular components
AT1G43620	3	1	other intracellular components
AT1G16590	3	1	other intracellular components
AT1G24090	3	1	other intracellular components
AT3G20800	3	1	other intracellular components
AT4G19210	3	1	other intracellular components
AT4G12040	3	1	other intracellular components
AT1G12050	3	1	other intracellular components
AT3G61620	3	1	other intracellular components
AT3G10700	3	1	other intracellular components
AT3G21280	3	1	other intracellular components
AT1G73570	3	1	other intracellular components
AT3G54580	3	1	other intracellular components
AT1G09270	3	1	other intracellular components
AT1G08190	3	1	other intracellular components
AT2G23820	3	1	other intracellular components
AT1G32340	3	1	other intracellular components
AT1G77050	3	1	other intracellular components
AT1G22910	3	1	other intracellular components
AT1G62300	3	1	other intracellular components
AT4G34270	3	1	other intracellular components
AT3G11450	3	1	other intracellular components
AT4G18300	3	1	other intracellular components
AT2G39320	3	1	other intracellular components
AT4G32175	3	1	other intracellular components
AT2G31040	3	1	other intracellular components
AT3G16550	3	1	other intracellular components
AT3G22220	1	0.02	cytosol
AT3G22220	2	0.03	other cytoplasmic components
AT3G22220	3	0.12	other intracellular components
AT3G22220	6	0.1	nucleus
AT3G22220	5	0.04	plasma membrane
AT3G22220	4	0.03	other membranes
AT3G22220	9	0.04	cell wall
AT3G22220	8	0.04	plastid
AT3G22220	11	0.09	chloroplast
AT3G22220	16	0.08	ribosome
AT3G22220	13	0.08	extracellular
AT3G22220	14	0.11	mitochondria
AT3G22220	15	0.05	other cellular components
AT3G22220	7	0.08	Golgi apparatus
AT3G22220	12	0.09	ER
AT2G30040	5	1	plasma membrane
AT5G11920	3	1	other intracellular components
AT2G02870	3	1	other intracellular components
AT1G22040	3	1	other intracellular components
AT1G23720	3	1	other intracellular components
AT3G01610	3	1	other intracellular components
AT4G12600	3	1	other intracellular components
AT1G55270	3	1	other intracellular components
AT3G29130	3	1	other intracellular components
AT4G22720	3	1	other intracellular components
AT1G75560	3	1	other intracellular components
AT1G04160	3	1	other intracellular components
AT4G21490	3	1	other intracellular components
AT3G45130	3	1	other intracellular components
AT3G53180	11	1	chloroplast
AT1G76870	3	1	other intracellular components
AT5G45050	4	1	other membranes
AT3G17760	3	1	other intracellular components
AT2G21250	3	1	other intracellular components
AT3G24900	3	1	other intracellular components
AT1G75600	3	1	other intracellular components
AT2G47115	3	1	other intracellular components
AT2G32090	3	1	other intracellular components
AT4G39520	3	1	other intracellular components
AT1G34140	3	1	other intracellular components
AT3G04820	3	1	other intracellular components
AT5G03220	3	1	other intracellular components
AT3G27060	3	1	other intracellular components
AT3G50560	3	1	other intracellular components
AT5G05470	3	1	other intracellular components
AT1G20370	3	1	other intracellular components
ATMG00810	1	0.04	cytosol
ATMG00810	2	0.05	other cytoplasmic components
ATMG00810	3	0.72	other intracellular components
ATMG00810	6	0.01	nucleus
ATMG00810	5	0.04	plasma membrane
ATMG00810	4	0.03	other membranes
ATMG00810	9	0.02	cell wall
ATMG00810	11	0.02	chloroplast
ATMG00810	14	0.01	mitochondria
ATMG00810	15	0.03	other cellular components
ATMG00810	7	0.02	Golgi apparatus
ATMG00810	12	0.01	ER
AT4G20220	1	0.04	cytosol
AT4G20220	2	0.05	other cytoplasmic components
AT4G20220	3	0.72	other intracellular components
AT4G20220	6	0.01	nucleus
AT4G20220	5	0.04	plasma membrane
AT4G20220	4	0.03	other membranes
AT4G20220	9	0.02	cell wall
AT4G20220	11	0.02	chloroplast
AT4G20220	14	0.01	mitochondria
AT4G20220	15	0.03	other cellular components
AT4G20220	7	0.02	Golgi apparatus
AT4G20220	12	0.01	ER
AT2G22570	3	1	other intracellular components
AT2G18245	1	0.05	cytosol
AT2G18245	2	0.12	other cytoplasmic components
AT2G18245	3	0.06	other intracellular components
AT2G18245	6	0.17	nucleus
AT2G18245	5	0.08	plasma membrane
AT2G18245	4	0.12	other membranes
AT2G18245	9	0.04	cell wall
AT2G18245	8	0.04	plastid
AT2G18245	11	0.04	chloroplast
AT2G18245	16	0.04	ribosome
AT2G18245	13	0.04	extracellular
AT2G18245	14	0.07	mitochondria
AT2G18245	15	0.03	other cellular components
AT2G18245	7	0.07	Golgi apparatus
AT2G18245	12	0.03	ER
AT1G10657	1	0.13	cytosol
AT1G10657	2	0.1	other cytoplasmic components
AT1G10657	3	0.1	other intracellular components
AT1G10657	6	0.03	nucleus
AT1G10657	5	0.03	plasma membrane
AT1G10657	4	0.06	other membranes
AT1G10657	9	0.07	cell wall
AT1G10657	8	0.08	plastid
AT1G10657	11	0.03	chloroplast
AT1G10657	16	0.02	ribosome
AT1G10657	13	0.02	extracellular
AT1G10657	14	0.1	mitochondria
AT1G10657	15	0.06	other cellular components
AT1G10657	7	0.08	Golgi apparatus
AT1G10657	12	0.09	ER
AT1G15040	3	1	other intracellular components
AT5G22570	3	1	other intracellular components
AT1G27060	3	1	other intracellular components
AT2G26400	3	1	other intracellular components
AT3G22980	3	1	other intracellular components
AT4G09140	3	1	other intracellular components
AT3G12480	3	1	other intracellular components
AT5G42010	3	1	other intracellular components
AT3G61710	3	1	other intracellular components
AT1G26665	3	1	other intracellular components
AT1G78440	3	1	other intracellular components
AT1G06670	3	1	other intracellular components
AT1G14620	3	1	other intracellular components
AT1G55510	3	1	other intracellular components
AT1G76460	3	1	other intracellular components
AT1G65540	3	1	other intracellular components
AT1G65660	3	1	other intracellular components
AT3G58180	3	1	other intracellular components
AT3G63310	3	1	other intracellular components
AT3G19020	3	1	other intracellular components
AT3G01640	3	1	other intracellular components
AT4G24130	3	1	other intracellular components
AT5G08565	3	1	other intracellular components
AT1G20690	3	1	other intracellular components
AT3G06760	3	1	other intracellular components
AT5G41820	3	1	other intracellular components
AT2G02550	3	1	other intracellular components
AT1G01880	3	1	other intracellular components
AT3G10520	1	0.03	cytosol
AT3G10520	2	0.02	other cytoplasmic components
AT3G10520	3	0.54	other intracellular components
AT3G10520	6	0.32	nucleus
AT3G10520	14	0.01	mitochondria
AT3G10520	15	0.01	other cellular components
AT3G10520	7	0.05	Golgi apparatus
AT3G10520	12	0.02	ER
AT3G25010	3	1	other intracellular components
AT5G61330	3	1	other intracellular components
AT1G71360	3	1	other intracellular components
AT1G22882	3	1	other intracellular components
AT2G25280	3	1	other intracellular components
AT2G28880	3	1	other intracellular components
AT4G17270	3	1	other intracellular components
AT1G77460	3	1	other intracellular components
AT1G44120	3	1	other intracellular components
AT1G61080	3	1	other intracellular components
AT5G06160	3	1	other intracellular components
AT4G09950	3	1	other intracellular components
AT1G60730	3	1	other intracellular components
AT5G50960	3	1	other intracellular components
AT3G42850	3	1	other intracellular components
AT1G03210	3	1	other intracellular components
AT3G56570	3	1	other intracellular components
AT5G10070	3	1	other intracellular components
AT1G66520	5	1	plasma membrane
AT1G55150	3	1	other intracellular components
AT2G27200	3	1	other intracellular components
AT1G67470	5	1	plasma membrane
AT3G52270	3	1	other intracellular components
AT1G67210	3	1	other intracellular components
AT5G66630	4	1	other membranes
AT2G46210	3	1	other intracellular components
AT1G68610	3	1	other intracellular components
AT5G61150	3	1	other intracellular components
AT3G58580	3	1	other intracellular components
AT4G00990	3	0.2	other intracellular components
AT4G00990	6	0.8	nucleus
AT4G00700	3	1	other intracellular components
AT3G57940	3	1	other intracellular components
AT3G25470	3	1	other intracellular components
AT1G50700	3	1	other intracellular components
AT2G19670	3	1	other intracellular components
AT5G66610	4	1	other membranes
AT1G59860	3	1	other intracellular components
AT3G57470	3	1	other intracellular components
AT4G00660	3	1	other intracellular components
AT3G28956	3	1	other intracellular components
AT3G26500	3	1	other intracellular components
AT5G36270	3	1	other intracellular components
AT1G16980	3	1	other intracellular components
AT3G50130	3	1	other intracellular components
AT1G03530	3	1	other intracellular components
AT4G14000	3	1	other intracellular components
AT3G14050	3	1	other intracellular components
AT3G08910	3	1	other intracellular components
AT1G67420	3	1	other intracellular components
AT5G08570	3	1	other intracellular components
AT2G21260	3	1	other intracellular components
AT5G66620	4	1	other membranes
AT1G34200	3	1	other intracellular components
AT1G66130	3	1	other intracellular components
AT2G03667	3	1	other intracellular components
AT2G39050	3	1	other intracellular components
AT1G76310	6	1	nucleus
AT3G24090	3	1	other intracellular components
AT4G11790	3	1	other intracellular components
AT5G17270	3	1	other intracellular components
AT2G30060	3	1	other intracellular components
AT4G28940	3	1	other intracellular components
AT1G25155	3	1	other intracellular components
AT1G25083	3	1	other intracellular components
AT1G24909	3	1	other intracellular components
AT3G15870	3	1	other intracellular components
AT3G18220	4	1	other membranes
AT3G14080	3	1	other intracellular components
AT4G31520	3	1	other intracellular components
AT3G03080	3	1	other intracellular components
AT4G18900	3	1	other intracellular components
AT2G19260	6	1	nucleus
AT1G69380	3	1	other intracellular components
AT2G26810	3	1	other intracellular components
AT4G02430	3	1	other intracellular components
AT3G05170	3	1	other intracellular components
AT1G52430	6	1	nucleus
AT3G20090	3	0.57	other intracellular components
AT3G20090	15	0.43	other cellular components
AT3G59845	3	1	other intracellular components
AT3G57000	3	1	other intracellular components
AT1G36730	3	1	other intracellular components
AT4G38930	3	1	other intracellular components
AT4G31790	3	1	other intracellular components
AT1G52450	6	1	nucleus
AT1G26320	3	1	other intracellular components
AT5G41880	3	1	other intracellular components
AT2G35660	3	1	other intracellular components
AT5G19970	3	1	other intracellular components
AT3G59810	3	1	other intracellular components
AT2G43810	3	1	other intracellular components
AT1G62840	3	1	other intracellular components
AT3G06890	3	1	other intracellular components
AT2G16060	1	0.03	cytosol
AT2G16060	2	0.02	other cytoplasmic components
AT2G16060	3	0.54	other intracellular components
AT2G16060	6	0.32	nucleus
AT2G16060	14	0.01	mitochondria
AT2G16060	15	0.01	other cellular components
AT2G16060	7	0.05	Golgi apparatus
AT2G16060	12	0.02	ER
AT1G51200	3	1	other intracellular components
AT1G15380	3	1	other intracellular components
AT4G16660	3	1	other intracellular components
AT5G03340	3	1	other intracellular components
AT4G18230	3	1	other intracellular components
AT4G18593	3	1	other intracellular components
AT4G22820	6	1	nucleus
AT2G37510	3	1	other intracellular components
AT1G48910	3	1	other intracellular components
AT1G80460	3	0.57	other intracellular components
AT1G80460	15	0.43	other cellular components
AT4G00540	3	1	other intracellular components
AT3G15970	3	1	other intracellular components
AT1G12470	3	1	other intracellular components
AT5G17000	3	1	other intracellular components
AT1G76680	3	1	other intracellular components
AT4G01023	4	1	other membranes
AT3G44190	3	1	other intracellular components
AT4G17830	3	1	other intracellular components
AT4G01560	3	1	other intracellular components
AT5G43720	3	1	other intracellular components
AT3G01460	1	0.01	cytosol
AT3G01460	2	0.02	other cytoplasmic components
AT3G01460	3	0.25	other intracellular components
AT3G01460	6	0.53	nucleus
AT3G01460	5	0.06	plasma membrane
AT3G01460	4	0.01	other membranes
AT3G01460	9	0.02	cell wall
AT3G01460	11	0.01	chloroplast
AT3G01460	14	0.06	mitochondria
AT3G01460	15	0.01	other cellular components
AT3G01460	7	0.02	Golgi apparatus
AT1G30810	3	0.2	other intracellular components
AT1G30810	6	0.8	nucleus
AT1G08620	3	0.2	other intracellular components
AT1G08620	6	0.8	nucleus
AT5G16960	3	1	other intracellular components
AT2G22100	3	1	other intracellular components
AT3G55380	3	1	other intracellular components
AT1G12010	3	1	other intracellular components
AT3G13230	3	1	other intracellular components
AT2G29780	3	1	other intracellular components
AT1G17330	3	1	other intracellular components
AT3G18860	3	1	other intracellular components
AT2G27650	6	1	nucleus
AT4G37120	3	1	other intracellular components
AT2G19560	3	1	other intracellular components
AT1G13330	3	1	other intracellular components
AT1G47500	3	1	other intracellular components
AT1G63800	3	1	other intracellular components
AT1G14260	3	1	other intracellular components
AT2G17250	3	1	other intracellular components
AT2G17930	3	1	other intracellular components
AT5G65900	3	1	other intracellular components
AT5G14470	3	1	other intracellular components
AT5G04610	3	1	other intracellular components
AT4G39870	3	1	other intracellular components
AT4G39280	3	1	other intracellular components
AT3G63510	3	1	other intracellular components
AT2G36260	3	1	other intracellular components
AT2G16710	3	1	other intracellular components
AT2G05590	3	1	other intracellular components
AT1G68750	3	1	other intracellular components
AT1G54070	1	0.09	cytosol
AT1G54070	2	0.05	other cytoplasmic components
AT1G54070	3	0.05	other intracellular components
AT1G54070	6	0.04	nucleus
AT1G54070	5	0.04	plasma membrane
AT1G54070	4	0.03	other membranes
AT1G54070	9	0.08	cell wall
AT1G54070	8	0.04	plastid
AT1G54070	11	0.03	chloroplast
AT1G54070	16	0.11	ribosome
AT1G54070	13	0.09	extracellular
AT1G54070	14	0.05	mitochondria
AT1G54070	15	0.08	other cellular components
AT1G54070	7	0.12	Golgi apparatus
AT1G54070	12	0.1	ER
AT1G33265	3	1	other intracellular components
AT1G25988	3	1	other intracellular components
AT1G23820	3	1	other intracellular components
AT1G08005	3	1	other intracellular components
AT1G13690	3	1	other intracellular components
AT3G57370	6	1	nucleus
AT3G47890	6	1	nucleus
AT1G12970	3	1	other intracellular components
AT1G05670	3	0.57	other intracellular components
AT1G05670	15	0.43	other cellular components
AT2G32700	3	1	other intracellular components
AT1G10210	5	1	plasma membrane
AT1G78955	3	1	other intracellular components
AT5G06260	3	1	other intracellular components
AT4G34070	3	1	other intracellular components
AT1G09660	3	1	other intracellular components
AT3G53800	3	1	other intracellular components
AT1G54510	3	1	other intracellular components
AT3G24430	3	1	other intracellular components
AT3G09380	3	1	other intracellular components
AT1G68310	3	1	other intracellular components
AT1G03150	3	1	other intracellular components
AT1G19730	3	1	other intracellular components
AT3G54720	3	1	other intracellular components
AT3G59480	3	0.69	other intracellular components
AT3G59480	11	0.31	chloroplast
AT1G49350	3	0.69	other intracellular components
AT1G49350	11	0.31	chloroplast
AT1G06030	3	0.69	other intracellular components
AT1G06030	11	0.31	chloroplast
AT1G06020	3	0.69	other intracellular components
AT1G06020	11	0.31	chloroplast
AT5G25490	3	1	other intracellular components
AT3G15960	3	1	other intracellular components
AT4G36960	3	1	other intracellular components
AT2G25870	3	1	other intracellular components
AT5G19300	3	1	other intracellular components
AT3G13640	3	1	other intracellular components
AT5G01380	3	1	other intracellular components
AT3G29380	6	1	nucleus
AT5G37980	3	1	other intracellular components
AT3G06540	3	1	other intracellular components
AT3G50580	4	1	other membranes
AT4G12790	3	1	other intracellular components
AT5G11900	3	1	other intracellular components
AT5G62600	3	1	other intracellular components
AT4G19800	3	0.11	other intracellular components
AT4G19800	15	0.89	other cellular components
AT5G17930	3	1	other intracellular components
AT2G24050	3	1	other intracellular components
AT1G65110	6	1	nucleus
AT2G18250	3	1	other intracellular components
AT1G67690	3	1	other intracellular components
AT1G64500	3	1	other intracellular components
AT1G61000	3	1	other intracellular components
AT4G20330	3	1	other intracellular components
AT4G18330	3	1	other intracellular components
AT2G30400	3	1	other intracellular components
AT2G36940	3	1	other intracellular components
AT2G33410	3	1	other intracellular components
AT1G61150	3	1	other intracellular components
AT1G11110	3	1	other intracellular components
AT3G60570	3	1	other intracellular components
AT5G16070	3	1	other intracellular components
AT3G02820	3	1	other intracellular components
AT1G18630	3	1	other intracellular components
AT1G67320	3	1	other intracellular components
AT3G02760	3	1	other intracellular components
AT1G11780	3	1	other intracellular components
AT1G65200	3	1	other intracellular components
AT1G49600	3	1	other intracellular components
AT2G17790	3	1	other intracellular components
AT2G39770	3	1	other intracellular components
AT3G44120	3	0.89	other intracellular components
AT3G44120	9	0.04	cell wall
AT3G44120	13	0.07	extracellular
AT2G07140	3	0.89	other intracellular components
AT2G07140	9	0.04	cell wall
AT2G07140	13	0.07	extracellular
AT2G43450	3	0.96	other intracellular components
AT2G43450	15	0.04	other cellular components
AT1G17790	3	1	other intracellular components
AT1G17370	3	1	other intracellular components
AT1G73540	3	1	other intracellular components
AT2G17720	3	1	other intracellular components
AT2G26700	3	1	other intracellular components
AT1G79250	3	1	other intracellular components
AT2G47240	3	1	other intracellular components
AT1G73230	3	1	other intracellular components
AT4G36850	3	1	other intracellular components
AT2G17705	3	1	other intracellular components
AT1G30580	3	1	other intracellular components
AT4G10480	3	1	other intracellular components
AT4G22550	4	1	other membranes
AT1G17880	3	1	other intracellular components
AT2G27630	6	1	nucleus
AT3G28715	3	1	other intracellular components
AT5G03580	3	1	other intracellular components
AT4G28820	3	1	other intracellular components
AT1G31160	3	1	other intracellular components
AT3G24350	3	1	other intracellular components
AT4G21220	3	1	other intracellular components
AT2G29500	3	1	other intracellular components
AT1G66680	3	1	other intracellular components
AT2G33330	3	1	other intracellular components
AT4G20100	3	1	other intracellular components
AT2G41050	3	1	other intracellular components
AT1G11250	3	1	other intracellular components
AT1G63210	3	1	other intracellular components
AT5G35930	3	1	other intracellular components
AT2G45700	3	1	other intracellular components
AT1G69210	3	1	other intracellular components
AT5G30495	3	1	other intracellular components
AT1G33890	3	1	other intracellular components
AT1G65440	3	1	other intracellular components
AT1G33040	3	1	other intracellular components
AT1G10050	3	0.61	other intracellular components
AT1G10050	5	0.39	plasma membrane
AT4G21610	3	1	other intracellular components
AT4G20380	3	1	other intracellular components
AT1G02170	3	1	other intracellular components
AT5G37940	3	1	other intracellular components
AT3G59920	3	1	other intracellular components
AT4G39890	3	1	other intracellular components
AT1G10810	3	1	other intracellular components
AT3G02270	3	1	other intracellular components
AT4G11060	3	1	other intracellular components
AT3G18580	3	1	other intracellular components
AT1G31010	3	1	other intracellular components
AT2G16370	3	1	other intracellular components
AT1G78950	3	1	other intracellular components
AT3G06010	3	1	other intracellular components
AT1G49150	3	1	other intracellular components
AT1G71750	3	1	other intracellular components
AT1G06710	3	1	other intracellular components
AT2G41630	3	1	other intracellular components
AT4G29440	3	1	other intracellular components
AT4G04740	3	1	other intracellular components
AT2G38910	3	1	other intracellular components
AT1G78960	3	1	other intracellular components
AT3G01410	3	1	other intracellular components
AT5G38000	3	1	other intracellular components
AT4G34412	3	1	other intracellular components
AT1G75200	3	1	other intracellular components
AT3G17120	3	1	other intracellular components
AT2G25730	1	0.03	cytosol
AT2G25730	2	0.02	other cytoplasmic components
AT2G25730	3	0.54	other intracellular components
AT2G25730	6	0.32	nucleus
AT2G25730	14	0.01	mitochondria
AT2G25730	15	0.01	other cellular components
AT2G25730	7	0.05	Golgi apparatus
AT2G25730	12	0.02	ER
AT5G58240	3	1	other intracellular components
AT1G53280	3	1	other intracellular components
AT3G02065	3	1	other intracellular components
AT5G11340	3	1	other intracellular components
AT1G10300	3	1	other intracellular components
AT3G45100	3	1	other intracellular components
AT5G08680	3	1	other intracellular components
AT4G15300	15	1	other cellular components
AT4G17730	3	1	other intracellular components
ATCG00830	3	1	other intracellular components
AT4G23070	5	1	plasma membrane
AT1G54390	6	1	nucleus
AT1G22330	3	1	other intracellular components
AT5G51530	6	1	nucleus
AT1G65130	6	1	nucleus
AT4G30260	3	1	other intracellular components
AT2G18840	3	1	other intracellular components
AT4G15410	3	1	other intracellular components
AT3G05280	3	1	other intracellular components
AT2G37150	3	1	other intracellular components
AT1G65990	3	1	other intracellular components
AT1G05350	3	1	other intracellular components
AT2G36300	3	1	other intracellular components
AT3G15450	3	1	other intracellular components
AT3G12530	3	1	other intracellular components
AT1G14310	3	1	other intracellular components
AT3G52760	3	1	other intracellular components
AT2G18660	3	1	other intracellular components
AT5G05210	3	1	other intracellular components
AT4G27000	3	1	other intracellular components
AT2G22170	11	1	chloroplast
AT1G55020	11	1	chloroplast
AT5G03760	3	1	other intracellular components
AT2G43020	3	1	other intracellular components
AT2G39260	3	1	other intracellular components
AT1G55390	3	1	other intracellular components
AT2G46780	3	1	other intracellular components
AT1G78260	3	1	other intracellular components
AT3G05710	3	1	other intracellular components
AT1G80490	3	1	other intracellular components
AT5G42740	3	1	other intracellular components
AT2G44100	3	1	other intracellular components
AT1G64710	3	1	other intracellular components
AT3G05760	3	1	other intracellular components
AT3G62560	3	1	other intracellular components
ATCG01230	3	1	other intracellular components
ATCG00905	3	1	other intracellular components
AT1G14300	3	1	other intracellular components
AT3G18190	3	1	other intracellular components
AT5G27200	3	1	other intracellular components
AT1G54580	3	1	other intracellular components
AT1G13560	3	1	other intracellular components
AT3G25585	3	1	other intracellular components
AT4G38020	3	1	other intracellular components
AT4G15520	3	1	other intracellular components
AT4G07390	3	1	other intracellular components
AT3G06180	3	0.75	other intracellular components
AT3G06180	16	0.25	ribosome
AT3G05100	3	1	other intracellular components
AT3G03310	3	1	other intracellular components
AT2G46240	1	0.06	cytosol
AT2G46240	2	0.05	other cytoplasmic components
AT2G46240	3	0.14	other intracellular components
AT2G46240	6	0.11	nucleus
AT2G46240	5	0.11	plasma membrane
AT2G46240	4	0.11	other membranes
AT2G46240	9	0.12	cell wall
AT2G46240	8	0.04	plastid
AT2G46240	11	0.03	chloroplast
AT2G46240	16	0.03	ribosome
AT2G46240	13	0.03	extracellular
AT2G46240	14	0.03	mitochondria
AT2G46240	15	0.07	other cellular components
AT2G46240	7	0.03	Golgi apparatus
AT2G46240	12	0.04	ER
AT2G43235	2	0.07	other cytoplasmic components
AT2G43235	3	0.07	other intracellular components
AT2G43235	4	0.81	other membranes
AT2G43235	7	0.05	Golgi apparatus
AT2G39725	3	0.19	other intracellular components
AT2G39725	14	0.8	mitochondria
AT2G39725	15	0.01	other cellular components
AT2G26200	3	1	other intracellular components
AT2G20725	3	0.99	other intracellular components
AT2G20725	11	0.01	chloroplast
AT2G03140	3	0.99	other intracellular components
AT2G03140	11	0.01	chloroplast
AT1G76065	3	0.19	other intracellular components
AT1G76065	14	0.8	mitochondria
AT1G76065	15	0.01	other cellular components
AT1G76060	3	0.19	other intracellular components
AT1G76060	14	0.8	mitochondria
AT1G76060	15	0.01	other cellular components
AT1G66860	3	1	other intracellular components
AT1G30010	3	1	other intracellular components
AT1G24267	1	0.1	cytosol
AT1G24267	2	0.11	other cytoplasmic components
AT1G24267	3	0.03	other intracellular components
AT1G24267	6	0.06	nucleus
AT1G24267	5	0.05	plasma membrane
AT1G24267	4	0.05	other membranes
AT1G24267	9	0.09	cell wall
AT1G24267	8	0.07	plastid
AT1G24267	11	0.08	chloroplast
AT1G24267	16	0.06	ribosome
AT1G24267	13	0.05	extracellular
AT1G24267	14	0.07	mitochondria
AT1G24267	15	0.06	other cellular components
AT1G24267	7	0.03	Golgi apparatus
AT1G24267	12	0.09	ER
AT1G24265	1	0.1	cytosol
AT1G24265	2	0.11	other cytoplasmic components
AT1G24265	3	0.03	other intracellular components
AT1G24265	6	0.06	nucleus
AT1G24265	5	0.05	plasma membrane
AT1G24265	4	0.05	other membranes
AT1G24265	9	0.09	cell wall
AT1G24265	8	0.07	plastid
AT1G24265	11	0.08	chloroplast
AT1G24265	16	0.06	ribosome
AT1G24265	13	0.05	extracellular
AT1G24265	14	0.07	mitochondria
AT1G24265	15	0.06	other cellular components
AT1G24265	7	0.03	Golgi apparatus
AT1G24265	12	0.09	ER
AT1G14270	3	0.99	other intracellular components
AT1G14270	11	0.01	chloroplast
AT1G13590	3	0.92	other intracellular components
AT1G13590	13	0.08	extracellular
AT1G12060	1	0.06	cytosol
AT1G12060	2	0.05	other cytoplasmic components
AT1G12060	3	0.14	other intracellular components
AT1G12060	6	0.11	nucleus
AT1G12060	5	0.11	plasma membrane
AT1G12060	4	0.11	other membranes
AT1G12060	9	0.12	cell wall
AT1G12060	8	0.04	plastid
AT1G12060	11	0.03	chloroplast
AT1G12060	16	0.03	ribosome
AT1G12060	13	0.03	extracellular
AT1G12060	14	0.03	mitochondria
AT1G12060	15	0.07	other cellular components
AT1G12060	7	0.03	Golgi apparatus
AT1G12060	12	0.04	ER
AT1G11210	3	1	other intracellular components
AT1G09980	3	1	other intracellular components
AT4G10110	3	1	other intracellular components
AT2G32500	3	1	other intracellular components
AT3G13224	3	1	other intracellular components
AT3G23080	3	1	other intracellular components
AT1G33360	3	1	other intracellular components
AT3G11830	3	1	other intracellular components
AT5G01390	3	1	other intracellular components
AT1G07990	3	1	other intracellular components
AT1G31830	3	1	other intracellular components
AT4G29520	3	1	other intracellular components
AT1G80500	3	1	other intracellular components
AT5G61950	6	1	nucleus
AT1G50090	3	1	other intracellular components
AT3G19420	3	1	other intracellular components
AT1G76170	3	1	other intracellular components
AT1G45110	3	1	other intracellular components
AT5G08415	3	1	other intracellular components
AT2G36930	3	1	other intracellular components
AT1G28390	5	1	plasma membrane
AT1G51160	3	1	other intracellular components
AT1G21400	3	1	other intracellular components
AT3G13450	3	1	other intracellular components
AT1G80440	3	1	other intracellular components
AT1G71300	3	1	other intracellular components
ATMG00080	3	1	other intracellular components
AT1G14570	3	1	other intracellular components
AT1G73250	3	1	other intracellular components
AT2G28820	3	1	other intracellular components
AT3G28870	3	1	other intracellular components
AT2G40860	5	1	plasma membrane
AT1G27430	6	1	nucleus
AT1G24300	6	1	nucleus
AT3G15280	3	1	other intracellular components
AT5G26710	3	1	other intracellular components
AT5G14170	3	1	other intracellular components
AT5G01320	3	1	other intracellular components
AT2G28420	3	1	other intracellular components
AT3G19050	3	1	other intracellular components
AT1G60650	3	1	other intracellular components
AT2G07785	3	1	other intracellular components
AT3G08810	3	1	other intracellular components
AT1G14880	3	1	other intracellular components
AT5G18490	3	1	other intracellular components
AT3G05670	3	1	other intracellular components
AT1G10350	3	1	other intracellular components
AT1G78090	3	1	other intracellular components
AT2G22190	3	1	other intracellular components
AT4G27550	3	1	other intracellular components
AT5G20600	3	1	other intracellular components
AT4G38780	3	1	other intracellular components
AT5G01780	4	0.68	other membranes
AT5G01780	7	0.32	Golgi apparatus
AT1G71280	3	1	other intracellular components
AT1G17000	3	1	other intracellular components
AT1G52800	3	1	other intracellular components
AT1G72560	3	1	other intracellular components
AT2G31305	3	1	other intracellular components
AT2G41250	3	1	other intracellular components
AT2G28400	3	1	other intracellular components
AT1G50670	3	1	other intracellular components
AT4G22590	3	1	other intracellular components
AT4G12430	3	1	other intracellular components
AT4G36940	3	1	other intracellular components
AT3G51270	3	1	other intracellular components
AT3G47940	3	1	other intracellular components
AT1G17890	3	1	other intracellular components
AT1G06560	5	1	plasma membrane
AT3G60450	3	1	other intracellular components
AT1G76690	3	1	other intracellular components
AT1G78050	3	1	other intracellular components
ATCG00780	3	1	other intracellular components
AT1G32210	3	1	other intracellular components
AT5G17440	3	1	other intracellular components
ATCG01300	3	1	other intracellular components
AT4G03450	3	1	other intracellular components
AT2G32780	3	1	other intracellular components
AT3G03773	3	1	other intracellular components
AT1G75850	3	1	other intracellular components
AT2G29070	3	1	other intracellular components
AT5G03430	3	1	other intracellular components
AT1G54280	3	1	other intracellular components
ATCG00810	3	1	other intracellular components
AT5G26180	5	1	plasma membrane
AT3G26360	3	1	other intracellular components
AT3G24880	4	1	other membranes
AT5G23910	3	1	other intracellular components
AT1G53790	3	1	other intracellular components
AT1G13700	3	0.97	other intracellular components
AT1G13700	11	0.03	chloroplast
AT3G46180	4	1	other membranes
AT1G12600	4	1	other membranes
AT4G23010	4	1	other membranes
AT1G78570	3	1	other intracellular components
AT1G54770	3	1	other intracellular components
AT1G76010	3	1	other intracellular components
AT1G29250	3	1	other intracellular components
AT1G20220	3	1	other intracellular components
AT2G29020	3	1	other intracellular components
AT3G14790	3	1	other intracellular components
AT5G14730	3	1	other intracellular components
AT5G26700	3	0.03	other intracellular components
AT5G26700	15	0.97	other cellular components
AT2G28680	3	0.03	other intracellular components
AT2G28680	15	0.97	other cellular components
AT1G07750	3	0.03	other intracellular components
AT1G07750	15	0.97	other cellular components
AT1G02335	3	0.03	other intracellular components
AT1G02335	15	0.97	other cellular components
AT1G35550	3	1	other intracellular components
AT1G05610	3	1	other intracellular components
AT3G49360	3	1	other intracellular components
AT3G55070	3	1	other intracellular components
AT5G24420	3	1	other intracellular components
AT4G20520	3	1	other intracellular components
AT2G16480	3	1	other intracellular components
ATCG00790	3	1	other intracellular components
ATCG00750	3	1	other intracellular components
AT3G21700	3	1	other intracellular components
AT5G41910	3	1	other intracellular components
AT2G21510	3	1	other intracellular components
AT1G59725	3	1	other intracellular components
ATMG01080	3	1	other intracellular components
AT1G27680	3	1	other intracellular components
AT2G33090	3	0.76	other intracellular components
AT2G33090	6	0.24	nucleus
AT2G32820	3	0.76	other intracellular components
AT2G32820	6	0.24	nucleus
AT2G27780	3	0.76	other intracellular components
AT2G27780	6	0.24	nucleus
AT2G13640	3	0.76	other intracellular components
AT2G13640	6	0.24	nucleus
AT5G24410	3	1	other intracellular components
AT5G54260	3	1	other intracellular components
AT1G06470	4	1	other membranes
AT5G53000	3	1	other intracellular components
AT2G19830	3	1	other intracellular components
AT1G30820	3	1	other intracellular components
AT1G55810	3	1	other intracellular components
AT1G11660	3	1	other intracellular components
AT1G67650	3	1	other intracellular components
AT1G23465	3	1	other intracellular components
AT1G63530	3	1	other intracellular components
AT4G39210	3	1	other intracellular components
AT4G39150	3	1	other intracellular components
AT4G17620	3	1	other intracellular components
AT5G55450	3	1	other intracellular components
AT2G20430	3	1	other intracellular components
AT1G61795	3	1	other intracellular components
AT1G03982	3	1	other intracellular components
AT2G18090	6	1	nucleus
AT1G78660	3	1	other intracellular components
AT2G21690	3	1	other intracellular components
AT2G32650	11	1	chloroplast
AT1G74900	3	1	other intracellular components
AT4G24920	3	1	other intracellular components
AT2G15910	3	1	other intracellular components
AT2G17190	3	1	other intracellular components
AT1G02410	3	1	other intracellular components
AT1G51090	3	1	other intracellular components
AT2G47850	3	1	other intracellular components
AT3G54210	3	1	other intracellular components
AT5G19310	3	1	other intracellular components
AT2G32720	3	1	other intracellular components
AT2G17200	3	1	other intracellular components
AT1G05530	3	0.57	other intracellular components
AT1G05530	15	0.43	other cellular components
AT3G14280	3	1	other intracellular components
ATMG00980	3	1	other intracellular components
AT1G03240	3	1	other intracellular components
AT1G03200	3	1	other intracellular components
AT3G20630	3	1	other intracellular components
ATCG00770	3	1	other intracellular components
AT5G16650	3	1	other intracellular components
AT1G52670	3	1	other intracellular components
AT1G72340	3	1	other intracellular components
AT4G29540	3	1	other intracellular components
AT2G38000	3	1	other intracellular components
AT5G18620	3	1	other intracellular components
AT4G16970	3	1	other intracellular components
AT1G54240	3	0.59	other intracellular components
AT1G54240	6	0.41	nucleus
AT5G16140	3	1	other intracellular components
AT2G45280	3	0.57	other intracellular components
AT2G45280	15	0.43	other cellular components
AT5G58770	3	1	other intracellular components
AT1G21160	3	1	other intracellular components
AT1G63270	4	1	other membranes
AT2G30140	3	0.57	other intracellular components
AT2G30140	15	0.43	other cellular components
AT3G46620	3	1	other intracellular components
AT1G78970	3	1	other intracellular components
AT5G49840	3	1	other intracellular components
AT3G24200	3	1	other intracellular components
AT2G27580	6	1	nucleus
AT5G58780	3	1	other intracellular components
AT1G76720	3	1	other intracellular components
AT1G27750	3	1	other intracellular components
AT2G23400	3	1	other intracellular components
AT3G29430	3	1	other intracellular components
AT5G50310	3	1	other intracellular components
AT2G27700	3	1	other intracellular components
AT3G20160	3	1	other intracellular components
AT2G18620	3	1	other intracellular components
AT3G14510	3	1	other intracellular components
AT5G58782	3	1	other intracellular components
AT3G32040	3	1	other intracellular components
AT4G32915	3	1	other intracellular components
AT5G02280	3	1	other intracellular components
AT1G67620	3	1	other intracellular components
AT4G38460	3	1	other intracellular components
AT2G47350	3	1	other intracellular components
AT1G79030	3	1	other intracellular components
AT3G06660	3	1	other intracellular components
AT5G58784	3	1	other intracellular components
AT1G24100	3	0.57	other intracellular components
AT1G24100	15	0.43	other cellular components
AT1G76700	3	1	other intracellular components
AT2G20550	3	1	other intracellular components
AT5G49370	2	0.69	other cytoplasmic components
AT5G49370	4	0.02	other membranes
AT5G49370	11	0.29	chloroplast
AT5G05520	3	1	other intracellular components
AT3G62630	3	1	other intracellular components
AT3G54570	3	0.98	other intracellular components
AT3G54570	5	0.02	plasma membrane
AT3G44160	3	0.99	other intracellular components
AT3G44160	11	0.01	chloroplast
AT3G30240	1	0.06	cytosol
AT3G30240	2	0.45	other cytoplasmic components
AT3G30240	3	0.03	other intracellular components
AT3G30240	6	0.03	nucleus
AT3G30240	5	0.01	plasma membrane
AT3G30240	4	0.24	other membranes
AT3G30240	9	0.02	cell wall
AT3G30240	11	0.04	chloroplast
AT3G30240	16	0.03	ribosome
AT3G30240	13	0.05	extracellular
AT3G30240	14	0.01	mitochondria
AT3G30240	15	0.01	other cellular components
AT3G30240	12	0.02	ER
AT3G28680	3	1	other intracellular components
AT3G27880	3	1	other intracellular components
AT3G15380	4	1	other membranes
AT3G11070	3	1	other intracellular components
AT3G04440	4	1	other membranes
AT3G03700	4	1	other membranes
AT2G38800	3	1	other intracellular components
AT2G32310	3	1	other intracellular components
AT2G30320	3	1	other intracellular components
AT2G18080	3	1	other intracellular components
AT2G15760	3	1	other intracellular components
AT2G05530	3	1	other intracellular components
AT1G76120	3	1	other intracellular components
AT1G75550	3	0.49	other intracellular components
AT1G75550	15	0.51	other cellular components
AT1G70420	3	1	other intracellular components
AT1G61160	1	0.06	cytosol
AT1G61160	2	0.45	other cytoplasmic components
AT1G61160	3	0.03	other intracellular components
AT1G61160	6	0.03	nucleus
AT1G61160	5	0.01	plasma membrane
AT1G61160	4	0.24	other membranes
AT1G61160	9	0.02	cell wall
AT1G61160	11	0.04	chloroplast
AT1G61160	16	0.03	ribosome
AT1G61160	13	0.05	extracellular
AT1G61160	14	0.01	mitochondria
AT1G61160	15	0.01	other cellular components
AT1G61160	12	0.02	ER
AT1G51560	3	1	other intracellular components
AT1G41860	1	0.06	cytosol
AT1G41860	2	0.45	other cytoplasmic components
AT1G41860	3	0.03	other intracellular components
AT1G41860	6	0.03	nucleus
AT1G41860	5	0.01	plasma membrane
AT1G41860	4	0.24	other membranes
AT1G41860	9	0.02	cell wall
AT1G41860	11	0.04	chloroplast
AT1G41860	16	0.03	ribosome
AT1G41860	13	0.05	extracellular
AT1G41860	14	0.01	mitochondria
AT1G41860	15	0.01	other cellular components
AT1G41860	12	0.02	ER
AT1G36550	1	0.06	cytosol
AT1G36550	2	0.45	other cytoplasmic components
AT1G36550	3	0.03	other intracellular components
AT1G36550	6	0.03	nucleus
AT1G36550	5	0.01	plasma membrane
AT1G36550	4	0.24	other membranes
AT1G36550	9	0.02	cell wall
AT1G36550	11	0.04	chloroplast
AT1G36550	16	0.03	ribosome
AT1G36550	13	0.05	extracellular
AT1G36550	14	0.01	mitochondria
AT1G36550	15	0.01	other cellular components
AT1G36550	12	0.02	ER
AT1G35860	3	0.99	other intracellular components
AT1G35860	11	0.01	chloroplast
AT1G34150	3	1	other intracellular components
AT1G23710	3	1	other intracellular components
AT1G09800	3	1	other intracellular components
ATMG00090	3	1	other intracellular components
AT2G23410	3	1	other intracellular components
AT1G76825	3	1	other intracellular components
AT3G11710	3	1	other intracellular components
AT5G23590	3	1	other intracellular components
AT2G03690	3	1	other intracellular components
AT2G26930	3	1	other intracellular components
AT2G05060	5	1	plasma membrane
AT2G39340	3	1	other intracellular components
AT2G17740	3	1	other intracellular components
AT4G30000	3	1	other intracellular components
AT1G21840	1	0.03	cytosol
AT1G21840	2	0.07	other cytoplasmic components
AT1G21840	3	0.16	other intracellular components
AT1G21840	6	0.01	nucleus
AT1G21840	4	0.56	other membranes
AT1G21840	8	0.01	plastid
AT1G21840	15	0.06	other cellular components
AT1G21840	7	0.02	Golgi apparatus
AT1G21840	12	0.08	ER
ATCG00760	3	1	other intracellular components
AT1G16680	3	1	other intracellular components
AT5G37130	3	1	other intracellular components
AT4G00050	3	1	other intracellular components
AT1G50480	3	1	other intracellular components
AT1G68370	3	1	other intracellular components
AT1G49950	3	0.59	other intracellular components
AT1G49950	6	0.41	nucleus
AT5G60500	3	1	other intracellular components
AT2G42080	3	1	other intracellular components
AT1G43670	3	1	other intracellular components
AT1G72416	3	1	other intracellular components
AT1G44160	3	1	other intracellular components
AT5G45010	3	1	other intracellular components
AT1G78355	3	1	other intracellular components
AT1G54930	3	1	other intracellular components
AT1G17277	3	1	other intracellular components
AT2G22010	3	1	other intracellular components
AT2G32350	6	1	nucleus
AT2G32120	3	1	other intracellular components
AT5G08160	5	1	plasma membrane
AT5G18820	3	1	other intracellular components
AT5G60510	3	1	other intracellular components
AT1G66960	3	1	other intracellular components
AT1G12930	3	1	other intracellular components
AT1G70290	3	1	other intracellular components
AT1G60140	3	1	other intracellular components
AT1G23870	3	1	other intracellular components
AT3G09310	3	1	other intracellular components
AT2G18600	3	1	other intracellular components
AT2G35390	3	1	other intracellular components
AT1G06960	3	1	other intracellular components
ATCG01310	3	1	other intracellular components
AT5G50320	3	1	other intracellular components
AT1G04130	3	1	other intracellular components
AT1G32920	3	1	other intracellular components
AT5G45020	3	1	other intracellular components
AT1G21080	3	1	other intracellular components
AT1G77020	3	1	other intracellular components
AT3G52660	3	1	other intracellular components
AT2G17570	3	1	other intracellular components
AT3G13020	1	0.01	cytosol
AT3G13020	2	0.03	other cytoplasmic components
AT3G13020	3	0.1	other intracellular components
AT3G13020	6	0.54	nucleus
AT3G13020	4	0.01	other membranes
AT3G13020	9	0.02	cell wall
AT3G13020	8	0.02	plastid
AT3G13020	11	0.07	chloroplast
AT3G13020	16	0.04	ribosome
AT3G13020	13	0.02	extracellular
AT3G13020	14	0.06	mitochondria
AT3G13020	15	0.04	other cellular components
AT3G13020	7	0.01	Golgi apparatus
AT3G13020	12	0.03	ER
AT1G36095	1	0.01	cytosol
AT1G36095	2	0.03	other cytoplasmic components
AT1G36095	3	0.1	other intracellular components
AT1G36095	6	0.54	nucleus
AT1G36095	4	0.01	other membranes
AT1G36095	9	0.02	cell wall
AT1G36095	8	0.02	plastid
AT1G36095	11	0.07	chloroplast
AT1G36095	16	0.04	ribosome
AT1G36095	13	0.02	extracellular
AT1G36095	14	0.06	mitochondria
AT1G36095	15	0.04	other cellular components
AT1G36095	7	0.01	Golgi apparatus
AT1G36095	12	0.03	ER
AT2G23350	3	1	other intracellular components
AT4G19700	3	1	other intracellular components
AT2G12290	3	1	other intracellular components
AT4G05210	3	1	other intracellular components
AT4G17770	3	1	other intracellular components
AT3G45020	3	1	other intracellular components
AT3G29639	3	1	other intracellular components
AT2G43410	3	1	other intracellular components
AT1G58080	3	1	other intracellular components
AT4G07990	3	1	other intracellular components
AT1G07615	3	1	other intracellular components
AT2G04900	3	1	other intracellular components
AT1G56300	3	1	other intracellular components
AT1G59980	3	1	other intracellular components
AT2G41000	3	1	other intracellular components
AT3G12170	3	1	other intracellular components
AT1G49380	3	0.99	other intracellular components
AT1G49380	11	0.01	chloroplast
AT1G06410	3	1	other intracellular components
AT1G69680	3	1	other intracellular components
AT2G36200	3	1	other intracellular components
AT4G04950	3	1	other intracellular components
AT5G16540	3	1	other intracellular components
AT3G02830	3	1	other intracellular components
AT3G14200	3	1	other intracellular components
AT5G15140	3	1	other intracellular components
AT5G14500	3	1	other intracellular components
AT4G23730	3	1	other intracellular components
AT3G61610	3	1	other intracellular components
AT3G47800	3	1	other intracellular components
AT3G17940	3	1	other intracellular components
AT3G01590	3	1	other intracellular components
AT1G32780	3	1	other intracellular components
AT4G26770	3	1	other intracellular components
AT5G40530	3	1	other intracellular components
AT1G47580	3	1	other intracellular components
AT1G61640	3	1	other intracellular components
AT2G32170	3	1	other intracellular components
AT1G34360	3	0.69	other intracellular components
AT1G34360	11	0.31	chloroplast
AT5G01230	3	1	other intracellular components
AT3G09100	3	1	other intracellular components
AT2G35680	3	1	other intracellular components
AT2G43000	3	1	other intracellular components
AT2G21090	3	1	other intracellular components
AT4G20860	3	1	other intracellular components
AT1G22430	3	1	other intracellular components
AT5G13830	3	1	other intracellular components
AT5G43680	3	1	other intracellular components
AT1G22440	3	1	other intracellular components
AT4G34490	3	1	other intracellular components
AT3G57890	3	1	other intracellular components
AT2G42230	3	1	other intracellular components
AT5G24970	3	1	other intracellular components
AT1G71697	3	1	other intracellular components
AT5G25530	3	1	other intracellular components
AT3G56880	2	0.01	other cytoplasmic components
AT3G56880	3	0.74	other intracellular components
AT3G56880	6	0.17	nucleus
AT3G56880	5	0.01	plasma membrane
AT3G56880	11	0.03	chloroplast
AT3G56880	16	0.02	ribosome
AT3G56880	15	0.02	other cellular components
AT2G37790	3	1	other intracellular components
AT3G28750	1	0.03	cytosol
AT3G28750	2	0.02	other cytoplasmic components
AT3G28750	3	0.54	other intracellular components
AT3G28750	6	0.32	nucleus
AT3G28750	14	0.01	mitochondria
AT3G28750	15	0.01	other cellular components
AT3G28750	7	0.05	Golgi apparatus
AT3G28750	12	0.02	ER
AT3G04520	3	1	other intracellular components
AT4G19590	3	1	other intracellular components
AT5G13520	3	1	other intracellular components
AT5G21090	3	1	other intracellular components
AT1G24120	3	1	other intracellular components
AT3G03720	3	1	other intracellular components
AT3G54380	3	1	other intracellular components
ATMG00520	3	1	other intracellular components
AT1G74350	3	1	other intracellular components
AT3G01200	3	1	other intracellular components
AT2G35720	3	1	other intracellular components
AT5G16290	3	1	other intracellular components
AT5G45900	3	1	other intracellular components
AT5G08340	3	1	other intracellular components
AT4G15417	3	1	other intracellular components
AT3G51520	3	1	other intracellular components
AT2G19490	3	1	other intracellular components
AT4G20930	3	1	other intracellular components
AT5G23330	3	1	other intracellular components
AT4G01880	3	1	other intracellular components
AT3G12930	3	1	other intracellular components
AT3G04500	4	1	other membranes
AT1G11390	3	1	other intracellular components
AT5G49580	3	1	other intracellular components
AT5G09570	3	1	other intracellular components
AT1G69750	3	1	other intracellular components
AT1G66590	3	1	other intracellular components
AT3G62780	3	1	other intracellular components
AT2G10560	3	1	other intracellular components
AT1G33660	15	1	other cellular components
AT1G77670	3	1	other intracellular components
AT3G24503	3	1	other intracellular components
AT2G14500	4	0.61	other membranes
AT2G14500	11	0.39	chloroplast
AT1G18600	3	1	other intracellular components
AT5G57590	3	1	other intracellular components
AT4G16580	3	1	other intracellular components
AT2G27450	3	1	other intracellular components
AT2G21350	3	1	other intracellular components
AT3G47390	3	1	other intracellular components
AT3G25130	3	1	other intracellular components
AT3G48770	1	0.01	cytosol
AT3G48770	2	0.03	other cytoplasmic components
AT3G48770	3	0.1	other intracellular components
AT3G48770	6	0.54	nucleus
AT3G48770	4	0.01	other membranes
AT3G48770	9	0.02	cell wall
AT3G48770	8	0.02	plastid
AT3G48770	11	0.07	chloroplast
AT3G48770	16	0.04	ribosome
AT3G48770	13	0.02	extracellular
AT3G48770	14	0.06	mitochondria
AT3G48770	15	0.04	other cellular components
AT3G48770	7	0.01	Golgi apparatus
AT3G48770	12	0.03	ER
AT3G17450	1	0.02	cytosol
AT3G17450	2	0.03	other cytoplasmic components
AT3G17450	3	0.12	other intracellular components
AT3G17450	6	0.1	nucleus
AT3G17450	5	0.04	plasma membrane
AT3G17450	4	0.03	other membranes
AT3G17450	9	0.04	cell wall
AT3G17450	8	0.04	plastid
AT3G17450	11	0.09	chloroplast
AT3G17450	16	0.08	ribosome
AT3G17450	13	0.08	extracellular
AT3G17450	14	0.11	mitochondria
AT3G17450	15	0.05	other cellular components
AT3G17450	7	0.08	Golgi apparatus
AT3G17450	12	0.09	ER
AT1G48605	5	1	plasma membrane
AT1G30680	3	1	other intracellular components
AT1G11040	3	1	other intracellular components
AT1G51420	5	1	plasma membrane
AT4G16130	3	1	other intracellular components
AT1G12740	3	0.99	other intracellular components
AT1G12740	15	0.01	other cellular components
AT3G52340	3	0.97	other intracellular components
AT3G52340	5	0.03	plasma membrane
AT2G30660	3	1	other intracellular components
AT1G71000	3	1	other intracellular components
AT5G06410	3	1	other intracellular components
AT5G06110	3	1	other intracellular components
AT1G49050	3	1	other intracellular components
AT3G05380	3	1	other intracellular components
AT4G14930	3	1	other intracellular components
AT3G18030	5	1	plasma membrane
AT1G65230	3	1	other intracellular components
AT1G72880	3	1	other intracellular components
AT4G35520	3	1	other intracellular components
AT2G01690	3	1	other intracellular components
AT3G53570	5	1	plasma membrane
AT1G10700	3	1	other intracellular components
AT1G67440	5	1	plasma membrane
AT3G46500	3	1	other intracellular components
AT3G48330	3	1	other intracellular components
AT1G73800	3	1	other intracellular components
AT5G09350	3	1	other intracellular components
AT1G27530	3	1	other intracellular components
AT4G25280	3	1	other intracellular components
AT1G78510	3	1	other intracellular components
AT2G30650	3	1	other intracellular components
AT1G59660	3	1	other intracellular components
AT1G67460	5	1	plasma membrane
AT1G49820	3	1	other intracellular components
AT1G42480	3	1	other intracellular components
AT5G08170	3	0.57	other intracellular components
AT5G08170	15	0.43	other cellular components
AT1G06060	3	1	other intracellular components
AT1G09940	3	1	other intracellular components
AT4G38640	4	1	other membranes
AT5G10910	3	1	other intracellular components
AT2G42650	3	1	other intracellular components
AT5G05750	3	1	other intracellular components
AT3G24190	3	1	other intracellular components
AT1G79890	3	1	other intracellular components
AT1G15990	3	1	other intracellular components
AT1G62970	11	1	chloroplast
AT2G25710	3	1	other intracellular components
AT4G22540	3	1	other intracellular components
AT4G12460	3	1	other intracellular components
AT4G08180	3	1	other intracellular components
AT2G31020	3	1	other intracellular components
AT2G29700	3	1	other intracellular components
AT1G77730	3	1	other intracellular components
AT1G13170	3	1	other intracellular components
AT1G73480	3	0.99	other intracellular components
AT1G73480	15	0.01	other cellular components
AT4G12740	3	0.44	other intracellular components
AT4G12740	11	0.56	chloroplast
AT3G07930	3	0.44	other intracellular components
AT3G07930	11	0.56	chloroplast
AT1G18360	3	0.99	other intracellular components
AT1G18360	15	0.01	other cellular components
AT3G04080	3	1	other intracellular components
AT5G38900	3	1	other intracellular components
AT4G19570	3	1	other intracellular components
AT5G13280	3	1	other intracellular components
AT2G18465	3	1	other intracellular components
AT1G09070	3	1	other intracellular components
AT1G15780	3	1	other intracellular components
AT5G15810	3	1	other intracellular components
AT4G33100	3	1	other intracellular components
AT1G20080	3	1	other intracellular components
AT1G23840	3	1	other intracellular components
AT1G62040	3	1	other intracellular components
AT2G29720	3	1	other intracellular components
AT3G09670	3	1	other intracellular components
AT2G26000	3	1	other intracellular components
AT1G18500	3	1	other intracellular components
AT4G05450	3	1	other intracellular components
AT1G06450	3	1	other intracellular components
AT1G18100	3	1	other intracellular components
AT5G37440	3	1	other intracellular components
AT1G15950	3	1	other intracellular components
AT3G02280	3	1	other intracellular components
AT2G31955	3	1	other intracellular components
AT5G40720	3	1	other intracellular components
AT4G37420	3	1	other intracellular components
AT4G20170	3	1	other intracellular components
AT4G17870	3	0.99	other intracellular components
AT4G17870	11	0.01	chloroplast
AT4G17650	3	1	other intracellular components
AT4G01883	3	0.99	other intracellular components
AT4G01883	11	0.01	chloroplast
AT3G62130	3	0.63	other intracellular components
AT3G62130	11	0.37	chloroplast
AT3G07380	3	1	other intracellular components
AT2G33570	3	1	other intracellular components
AT2G16760	5	0.01	plasma membrane
AT2G16760	4	0.99	other membranes
AT1G72480	3	1	other intracellular components
AT1G67780	6	1	nucleus
AT1G67270	3	1	other intracellular components
AT1G61670	3	1	other intracellular components
AT1G27200	3	1	other intracellular components
AT1G10980	3	1	other intracellular components
AT1G02475	3	0.99	other intracellular components
AT1G02475	11	0.01	chloroplast
[truncated: 18,656 more rows]

## Sheet: BP
ORF	GO ID	WPN Score	GO Term
AT1G72730	33	1	other cellular processes
AT1G02080	33	1	other cellular processes
AT1G79010	33	1	other cellular processes
AT1G16700	33	1	other cellular processes
AT4G11420	33	1	other cellular processes
AT3G49930	33	1	other cellular processes
AT2G03430	33	1	other cellular processes
AT2G35920	33	1	other cellular processes
AT1G02040	33	1	other cellular processes
AT1G50940	33	1	other cellular processes
AT1G47330	33	1	other cellular processes
AT2G14520	33	1	other cellular processes
AT1G80070	33	1	other cellular processes
ATCG00870	35	0.08	transport
ATCG00870	33	0.05	other cellular processes
ATCG00870	41	0.11	cell organization and biogenesis
ATCG00870	36	0.24	protein metabolism
ATCG00870	37	0.07	response to stress
ATCG00870	40	0.06	response to abiotic or biotic stimulus
ATCG00870	44	0.03	developmental processes
ATCG00870	34	0.03	other metabolic processes
ATCG00870	28	0.04	other biological processes
ATCG00870	39	0.06	signal transduction
ATCG00870	42	0.1	electron transport or energy pathways
ATCG00870	38	0.13	DNA or RNA metabolism
AT3G46220	33	1	other cellular processes
AT2G17900	33	1	other cellular processes
AT1G27050	37	1	response to stress
ATCG00900	33	1	other cellular processes
ATMG00490	35	0.16	transport
ATMG00490	33	0.02	other cellular processes
ATMG00490	41	0.04	cell organization and biogenesis
ATMG00490	36	0.05	protein metabolism
ATMG00490	37	0.1	response to stress
ATMG00490	40	0.1	response to abiotic or biotic stimulus
ATMG00490	44	0.08	developmental processes
ATMG00490	34	0.08	other metabolic processes
ATMG00490	28	0.03	other biological processes
ATMG00490	39	0.07	signal transduction
ATMG00490	42	0.1	electron transport or energy pathways
ATMG00490	38	0.17	DNA or RNA metabolism
AT2G36610	37	1	response to stress
ATCG00860	33	1	other cellular processes
AT2G38210	33	1	other cellular processes
AT3G53630	35	0.49	transport
AT3G53630	33	0.16	other cellular processes
AT3G53630	36	0.03	protein metabolism
AT3G53630	37	0.03	response to stress
AT3G53630	40	0.05	response to abiotic or biotic stimulus
AT3G53630	44	0.02	developmental processes
AT3G53630	34	0.01	other metabolic processes
AT3G53630	28	0.15	other biological processes
AT3G53630	39	0.01	signal transduction
AT3G53630	42	0.02	electron transport or energy pathways
AT3G53630	38	0.03	DNA or RNA metabolism
AT1G55710	35	0.49	transport
AT1G55710	33	0.16	other cellular processes
AT1G55710	36	0.03	protein metabolism
AT1G55710	37	0.03	response to stress
AT1G55710	40	0.05	response to abiotic or biotic stimulus
AT1G55710	44	0.02	developmental processes
AT1G55710	34	0.01	other metabolic processes
AT1G55710	28	0.15	other biological processes
AT1G55710	39	0.01	signal transduction
AT1G55710	42	0.02	electron transport or energy pathways
AT1G55710	38	0.03	DNA or RNA metabolism
AT1G25250	33	1	other cellular processes
AT2G01940	33	1	other cellular processes
AT1G68130	33	1	other cellular processes
ATCG01000	35	0.03	transport
ATCG01000	33	0.19	other cellular processes
ATCG01000	41	0.08	cell organization and biogenesis
ATCG01000	36	0.2	protein metabolism
ATCG01000	37	0.05	response to stress
ATCG01000	40	0.07	response to abiotic or biotic stimulus
ATCG01000	44	0.03	developmental processes
ATCG01000	34	0.11	other metabolic processes
ATCG01000	28	0.03	other biological processes
ATCG01000	39	0.06	signal transduction
ATCG01000	42	0.05	electron transport or energy pathways
ATCG01000	38	0.1	DNA or RNA metabolism
AT1G60850	33	1	other cellular processes
AT1G60620	33	1	other cellular processes
ATMG00170	33	0.83	other cellular processes
ATMG00170	41	0.04	cell organization and biogenesis
ATMG00170	36	0.02	protein metabolism
ATMG00170	37	0.02	response to stress
ATMG00170	40	0.01	response to abiotic or biotic stimulus
ATMG00170	44	0.02	developmental processes
ATMG00170	28	0.02	other biological processes
ATMG00170	39	0.01	signal transduction
ATMG00170	42	0.02	electron transport or energy pathways
ATMG00170	38	0.01	DNA or RNA metabolism
AT4G08685	33	1	other cellular processes
AT5G07590	33	1	other cellular processes
AT3G56150	33	1	other cellular processes
AT1G29940	33	1	other cellular processes
AT2G15430	33	1	other cellular processes
AT5G04600	33	1	other cellular processes
AT4G34120	33	1	other cellular processes
AT3G11400	33	1	other cellular processes
AT3G12860	33	1	other cellular processes
AT3G21540	33	1	other cellular processes
AT3G22320	33	1	other cellular processes
AT4G14230	33	1	other cellular processes
AT5G45140	33	1	other cellular processes
AT5G14050	33	1	other cellular processes
AT1G24706	33	1	other cellular processes
AT4G04940	33	1	other cellular processes
AT2G40360	33	1	other cellular processes
AT3G10400	33	1	other cellular processes
AT1G03360	33	1	other cellular processes
AT2G23840	33	1	other cellular processes
AT2G42500	33	1	other cellular processes
AT4G14240	33	1	other cellular processes
AT2G17510	33	1	other cellular processes
AT2G01735	33	0.95	other cellular processes
AT2G01735	34	0.05	other metabolic processes
AT3G16980	33	1	other cellular processes
AT3G15460	33	1	other cellular processes
AT2G44510	33	1	other cellular processes
AT2G46290	33	1	other cellular processes
AT1G04170	33	1	other cellular processes
AT4G28200	33	1	other cellular processes
AT2G15400	33	1	other cellular processes
AT3G06670	33	1	other cellular processes
AT3G60240	33	1	other cellular processes
AT3G51730	33	1	other cellular processes
AT1G07940	33	1	other cellular processes
AT1G07930	33	1	other cellular processes
AT2G39830	37	1	response to stress
AT5G20930	36	1	protein metabolism
AT1G13160	33	1	other cellular processes
AT4G16265	33	1	other cellular processes
AT3G52090	33	1	other cellular processes
AT3G22660	33	1	other cellular processes
AT1G03330	33	1	other cellular processes
AT1G49540	33	1	other cellular processes
AT1G52930	33	1	other cellular processes
AT2G03780	33	1	other cellular processes
AT2G32600	33	1	other cellular processes
AT3G05060	33	1	other cellular processes
AT5G11500	33	1	other cellular processes
AT3G16810	33	1	other cellular processes
AT4G36860	37	1	response to stress
AT3G11890	35	0.23	transport
AT3G11890	33	0.45	other cellular processes
AT3G11890	41	0.03	cell organization and biogenesis
AT3G11890	36	0.02	protein metabolism
AT3G11890	37	0.03	response to stress
AT3G11890	40	0.01	response to abiotic or biotic stimulus
AT3G11890	44	0.04	developmental processes
AT3G11890	34	0.11	other metabolic processes
AT3G11890	28	0.05	other biological processes
AT3G11890	39	0.01	signal transduction
AT3G11890	42	0.01	electron transport or energy pathways
AT3G11890	38	0.01	DNA or RNA metabolism
AT1G16030	33	1	other cellular processes
AT3G59650	33	1	other cellular processes
AT3G48380	33	0.99	other cellular processes
AT3G48380	44	0.01	developmental processes
AT1G61040	33	1	other cellular processes
AT2G31410	33	1	other cellular processes
AT1G18040	33	1	other cellular processes
AT4G34910	33	1	other cellular processes
AT2G05630	33	1	other cellular processes
AT3G13940	33	1	other cellular processes
AT2G28860	33	1	other cellular processes
AT1G54250	33	1	other cellular processes
AT1G51730	33	1	other cellular processes
AT2G32070	33	1	other cellular processes
AT2G46230	33	1	other cellular processes
AT3G04770	33	1	other cellular processes
AT3G58560	33	1	other cellular processes
AT1G28060	33	1	other cellular processes
AT1G27752	33	1	other cellular processes
AT3G03920	33	1	other cellular processes
AT3G16840	33	1	other cellular processes
AT2G11000	33	1	other cellular processes
AT1G21500	33	1	other cellular processes
AT5G50870	33	1	other cellular processes
AT1G03860	33	1	other cellular processes
AT1G79730	33	1	other cellular processes
AT1G61700	33	1	other cellular processes
AT3G56640	33	1	other cellular processes
AT2G18220	33	1	other cellular processes
AT3G02520	33	1	other cellular processes
AT5G48640	33	1	other cellular processes
AT5G43500	33	1	other cellular processes
AT3G01160	33	1	other cellular processes
AT1G75510	33	1	other cellular processes
AT4G26720	33	1	other cellular processes
AT3G18130	33	1	other cellular processes
AT1G31970	33	1	other cellular processes
AT1G63810	33	1	other cellular processes
AT3G55220	33	1	other cellular processes
AT3G55200	33	1	other cellular processes
AT4G18480	33	1	other cellular processes
AT3G63460	33	1	other cellular processes
AT1G18260	33	1	other cellular processes
AT3G07760	35	0.23	transport
AT3G07760	33	0.45	other cellular processes
AT3G07760	41	0.03	cell organization and biogenesis
AT3G07760	36	0.02	protein metabolism
AT3G07760	37	0.03	response to stress
AT3G07760	40	0.01	response to abiotic or biotic stimulus
AT3G07760	44	0.04	developmental processes
AT3G07760	34	0.11	other metabolic processes
AT3G07760	28	0.05	other biological processes
AT3G07760	39	0.01	signal transduction
AT3G07760	42	0.01	electron transport or energy pathways
AT3G07760	38	0.01	DNA or RNA metabolism
AT1G68650	33	1	other cellular processes
AT5G10960	33	1	other cellular processes
AT1G10490	33	1	other cellular processes
AT2G34050	33	1	other cellular processes
AT4G37280	33	1	other cellular processes
AT3G10970	33	1	other cellular processes
AT4G18905	33	1	other cellular processes
AT3G42179	35	0.06	transport
AT3G42179	33	0.06	other cellular processes
AT3G42179	41	0.09	cell organization and biogenesis
AT3G42179	36	0.1	protein metabolism
AT3G42179	37	0.15	response to stress
AT3G42179	40	0.09	response to abiotic or biotic stimulus
AT3G42179	44	0.06	developmental processes
AT3G42179	34	0.06	other metabolic processes
AT3G42179	28	0.13	other biological processes
AT3G42179	39	0.11	signal transduction
AT3G42179	42	0.06	electron transport or energy pathways
AT3G42179	38	0.03	DNA or RNA metabolism
AT3G16990	33	1	other cellular processes
AT1G69485	33	1	other cellular processes
AT1G04900	33	1	other cellular processes
AT1G50010	33	1	other cellular processes
AT3G07100	33	1	other cellular processes
AT2G10440	33	1	other cellular processes
AT1G70820	33	1	other cellular processes
AT3G23620	33	1	other cellular processes
AT1G10580	33	1	other cellular processes
AT3G23900	33	1	other cellular processes
AT1G48630	33	1	other cellular processes
AT2G40430	33	1	other cellular processes
AT5G47430	33	1	other cellular processes
AT1G60430	33	1	other cellular processes
AT1G26450	33	1	other cellular processes
AT5G14530	33	1	other cellular processes
AT3G07810	33	1	other cellular processes
AT3G62580	33	1	other cellular processes
AT1G05120	33	1	other cellular processes
AT1G69070	33	1	other cellular processes
AT3G45630	33	1	other cellular processes
AT3G09780	36	1	protein metabolism
AT2G04660	33	1	other cellular processes
AT1G20970	33	1	other cellular processes
AT3G57660	33	1	other cellular processes
AT1G73530	33	1	other cellular processes
AT1G13120	33	1	other cellular processes
AT1G03350	33	1	other cellular processes
AT1G72100	35	0.03	transport
AT1G72100	33	0.57	other cellular processes
AT1G72100	41	0.01	cell organization and biogenesis
AT1G72100	36	0.05	protein metabolism
AT1G72100	37	0.01	response to stress
AT1G72100	40	0.01	response to abiotic or biotic stimulus
AT1G72100	44	0.03	developmental processes
AT1G72100	34	0.23	other metabolic processes
AT1G72100	28	0.03	other biological processes
AT1G72100	42	0.02	electron transport or energy pathways
AT1G72100	38	0.01	DNA or RNA metabolism
AT1G29970	33	1	other cellular processes
ATCG00065	33	1	other cellular processes
AT2G36370	33	0.17	other cellular processes
AT2G36370	40	0.83	response to abiotic or biotic stimulus
AT5G25757	33	1	other cellular processes
AT5G25754	33	1	other cellular processes
AT4G33666	33	1	other cellular processes
AT4G13860	33	1	other cellular processes
AT3G52590	33	1	other cellular processes
AT4G04210	33	1	other cellular processes
AT5G28740	33	1	other cellular processes
AT1G23100	33	1	other cellular processes
AT2G37770	33	1	other cellular processes
AT2G37990	33	1	other cellular processes
AT3G59630	33	1	other cellular processes
AT2G06040	33	1	other cellular processes
AT4G39220	33	1	other cellular processes
AT3G10530	33	1	other cellular processes
AT2G19385	33	1	other cellular processes
AT1G11650	33	1	other cellular processes
AT3G13180	36	1	protein metabolism
AT3G03890	33	1	other cellular processes
AT1G17680	33	1	other cellular processes
AT1G10030	33	1	other cellular processes
AT4G14300	33	1	other cellular processes
AT3G26560	33	1	other cellular processes
AT1G50030	33	1	other cellular processes
AT1G71820	33	1	other cellular processes
AT1G65040	33	1	other cellular processes
AT3G07480	33	1	other cellular processes
AT1G56110	33	1	other cellular processes
AT2G40700	33	1	other cellular processes
AT1G33470	33	1	other cellular processes
AT5G19440	33	1	other cellular processes
AT1G03750	33	1	other cellular processes
AT1G63340	33	1	other cellular processes
AT2G31670	33	1	other cellular processes
AT3G60360	33	1	other cellular processes
AT5G08420	33	1	other cellular processes
AT3G05000	33	1	other cellular processes
AT5G06680	33	1	other cellular processes
AT2G34570	33	1	other cellular processes
AT5G54750	33	1	other cellular processes
AT1G12270	33	1	other cellular processes
AT4G16630	33	1	other cellular processes
AT1G73820	33	1	other cellular processes
AT2G35450	33	1	other cellular processes
AT1G23280	33	1	other cellular processes
AT2G34500	33	1	other cellular processes
AT1G15440	33	1	other cellular processes
AT2G21440	33	1	other cellular processes
AT1G54650	33	1	other cellular processes
AT3G62310	33	1	other cellular processes
AT2G25355	33	1	other cellular processes
AT3G27240	33	1	other cellular processes
AT1G17470	33	1	other cellular processes
AT3G57630	33	1	other cellular processes
AT4G05020	33	1	other cellular processes
AT2G36740	33	1	other cellular processes
AT5G35080	33	1	other cellular processes
AT1G03110	33	1	other cellular processes
AT2G18510	33	1	other cellular processes
AT1G52980	33	1	other cellular processes
AT1G25520	33	1	other cellular processes
AT3G15080	33	1	other cellular processes
AT2G34490	33	1	other cellular processes
AT2G03820	33	1	other cellular processes
AT5G02150	33	1	other cellular processes
AT1G04230	33	1	other cellular processes
AT1G50370	33	1	other cellular processes
AT1G50920	33	1	other cellular processes
AT5G54910	33	1	other cellular processes
AT4G04910	33	1	other cellular processes
AT2G32260	33	1	other cellular processes
AT2G28360	33	1	other cellular processes
AT2G19870	33	1	other cellular processes
AT1G66500	33	1	other cellular processes
AT1G18640	33	1	other cellular processes
AT3G16680	33	1	other cellular processes
AT3G03340	33	1	other cellular processes
AT3G21300	33	1	other cellular processes
AT1G11240	33	1	other cellular processes
AT1G05500	33	1	other cellular processes
AT1G35910	33	1	other cellular processes
AT4G10790	33	1	other cellular processes
AT1G47490	33	1	other cellular processes
AT1G31660	33	1	other cellular processes
AT4G34640	33	1	other cellular processes
AT1G07840	33	1	other cellular processes
AT2G43650	33	1	other cellular processes
AT3G56510	33	1	other cellular processes
AT3G54690	33	1	other cellular processes
AT1G12650	33	1	other cellular processes
AT3G48540	33	1	other cellular processes
AT5G44160	33	1	other cellular processes
AT3G59600	33	1	other cellular processes
AT4G20030	33	1	other cellular processes
AT1G30070	33	1	other cellular processes
AT1G03270	33	1	other cellular processes
AT2G19540	33	1	other cellular processes
AT1G68020	33	1	other cellular processes
AT1G79150	33	1	other cellular processes
AT1G01080	33	1	other cellular processes
AT2G22400	33	1	other cellular processes
AT1G14360	33	1	other cellular processes
AT4G19610	33	1	other cellular processes
AT3G52050	33	1	other cellular processes
AT1G27290	33	1	other cellular processes
AT1G60770	33	1	other cellular processes
AT1G73320	33	1	other cellular processes
AT1G72240	33	1	other cellular processes
AT1G15010	33	1	other cellular processes
AT1G05460	33	1	other cellular processes
AT5G61770	33	1	other cellular processes
AT1G06790	33	1	other cellular processes
AT1G19120	33	1	other cellular processes
AT1G48130	33	1	other cellular processes
AT2G38250	33	1	other cellular processes
AT3G08930	33	1	other cellular processes
AT5G01460	33	1	other cellular processes
AT1G09870	33	1	other cellular processes
AT1G78190	33	1	other cellular processes
AT3G52580	33	1	other cellular processes
AT1G28080	33	1	other cellular processes
AT2G20690	33	1	other cellular processes
AT3G19130	33	1	other cellular processes
AT3G09720	33	1	other cellular processes
AT4G02690	33	1	other cellular processes
AT1G03070	33	1	other cellular processes
AT1G65970	33	1	other cellular processes
AT1G60740	33	1	other cellular processes
AT3G24080	33	1	other cellular processes
AT4G23860	33	1	other cellular processes
AT4G27270	33	1	other cellular processes
AT1G20610	33	1	other cellular processes
AT1G20590	33	1	other cellular processes
AT5G52820	33	1	other cellular processes
AT5G23680	35	0.23	transport
AT5G23680	33	0.45	other cellular processes
AT5G23680	41	0.03	cell organization and biogenesis
AT5G23680	36	0.02	protein metabolism
AT5G23680	37	0.03	response to stress
AT5G23680	40	0.01	response to abiotic or biotic stimulus
AT5G23680	44	0.04	developmental processes
AT5G23680	34	0.11	other metabolic processes
AT5G23680	28	0.05	other biological processes
AT5G23680	39	0.01	signal transduction
AT5G23680	42	0.01	electron transport or energy pathways
AT5G23680	38	0.01	DNA or RNA metabolism
AT3G07170	35	0.23	transport
AT3G07170	33	0.45	other cellular processes
AT3G07170	41	0.03	cell organization and biogenesis
AT3G07170	36	0.02	protein metabolism
AT3G07170	37	0.03	response to stress
AT3G07170	40	0.01	response to abiotic or biotic stimulus
AT3G07170	44	0.04	developmental processes
AT3G07170	34	0.11	other metabolic processes
AT3G07170	28	0.05	other biological processes
AT3G07170	39	0.01	signal transduction
AT3G07170	42	0.01	electron transport or energy pathways
AT3G07170	38	0.01	DNA or RNA metabolism
AT1G70180	35	0.23	transport
AT1G70180	33	0.45	other cellular processes
AT1G70180	41	0.03	cell organization and biogenesis
AT1G70180	36	0.02	protein metabolism
AT1G70180	37	0.03	response to stress
AT1G70180	40	0.01	response to abiotic or biotic stimulus
AT1G70180	44	0.04	developmental processes
AT1G70180	34	0.11	other metabolic processes
AT1G70180	28	0.05	other biological processes
AT1G70180	39	0.01	signal transduction
AT1G70180	42	0.01	electron transport or energy pathways
AT1G70180	38	0.01	DNA or RNA metabolism
AT2G47640	33	1	other cellular processes
AT1G20580	33	1	other cellular processes
AT3G06740	33	1	other cellular processes
AT5G41190	33	1	other cellular processes
AT2G47250	33	1	other cellular processes
AT1G49880	33	1	other cellular processes
AT5G17570	33	1	other cellular processes
AT1G03280	33	1	other cellular processes
AT3G15353	33	1	other cellular processes
AT2G22870	33	1	other cellular processes
AT3G14100	33	1	other cellular processes
AT2G42270	33	1	other cellular processes
AT1G26530	33	1	other cellular processes
AT1G19020	33	1	other cellular processes
AT1G74230	33	1	other cellular processes
AT3G45300	33	1	other cellular processes
AT4G28450	33	1	other cellular processes
AT1G66510	33	1	other cellular processes
AT1G55130	33	1	other cellular processes
AT1G75140	35	0.01	transport
AT1G75140	33	0.04	other cellular processes
AT1G75140	44	0.93	developmental processes
AT1G75140	42	0.01	electron transport or energy pathways
AT1G75140	38	0.01	DNA or RNA metabolism
AT5G54900	33	1	other cellular processes
AT2G40900	33	1	other cellular processes
AT1G60000	33	1	other cellular processes
AT3G56450	33	1	other cellular processes
AT2G41110	33	1	other cellular processes
AT2G27030	33	1	other cellular processes
AT1G26160	33	1	other cellular processes
AT5G16730	33	1	other cellular processes
AT4G24300	35	0.16	transport
AT4G24300	33	0.06	other cellular processes
AT4G24300	41	0.06	cell organization and biogenesis
AT4G24300	36	0.12	protein metabolism
AT4G24300	37	0.07	response to stress
AT4G24300	40	0.08	response to abiotic or biotic stimulus
AT4G24300	44	0.07	developmental processes
AT4G24300	34	0.09	other metabolic processes
AT4G24300	28	0.05	other biological processes
AT4G24300	39	0.04	signal transduction
AT4G24300	42	0.12	electron transport or energy pathways
AT4G24300	38	0.08	DNA or RNA metabolism
AT4G04423	33	0.89	other cellular processes
AT4G04423	34	0.11	other metabolic processes
AT4G00895	33	1	other cellular processes
AT3G57220	33	1	other cellular processes
AT3G09390	33	1	other cellular processes
AT2G41490	33	1	other cellular processes
AT1G52590	33	1	other cellular processes
AT1G03687	33	1	other cellular processes
AT3G23175	35	0.07	transport
AT3G23175	33	0.11	other cellular processes
AT3G23175	41	0.18	cell organization and biogenesis
AT3G23175	36	0.03	protein metabolism
AT3G23175	37	0.05	response to stress
AT3G23175	40	0.12	response to abiotic or biotic stimulus
AT3G23175	44	0.06	developmental processes
AT3G23175	34	0.1	other metabolic processes
AT3G23175	28	0.08	other biological processes
AT3G23175	39	0.06	signal transduction
AT3G23175	42	0.07	electron transport or energy pathways
AT3G23175	38	0.07	DNA or RNA metabolism
AT1G15420	33	1	other cellular processes
AT3G60400	33	1	other cellular processes
AT2G18330	33	1	other cellular processes
AT4G01920	33	1	other cellular processes
AT1G04880	33	1	other cellular processes
AT4G27680	33	1	other cellular processes
AT1G35617	33	1	other cellular processes
AT1G09150	33	1	other cellular processes
AT3G03060	33	1	other cellular processes
AT5G08630	33	1	other cellular processes
AT1G18380	33	1	other cellular processes
AT4G31420	33	1	other cellular processes
AT2G47310	33	1	other cellular processes
AT4G01790	33	1	other cellular processes
AT1G12440	33	1	other cellular processes
AT3G02030	33	0.82	other cellular processes
AT3G02030	34	0.18	other metabolic processes
AT1G12790	41	0.45	cell organization and biogenesis
AT1G12790	38	0.55	DNA or RNA metabolism
AT1G74250	33	1	other cellular processes
AT4G17520	33	1	other cellular processes
AT1G56060	33	1	other cellular processes
AT5G05450	33	1	other cellular processes
AT1G71370	33	1	other cellular processes
AT5G25800	33	1	other cellular processes
AT1G78410	33	1	other cellular processes
AT1G25500	33	1	other cellular processes
AT5G19120	36	1	protein metabolism
AT3G04480	33	1	other cellular processes
AT1G14240	33	1	other cellular processes
AT1G65690	33	1	other cellular processes
AT3G62840	33	1	other cellular processes
AT1G31780	33	1	other cellular processes
AT5G15580	33	1	other cellular processes
AT1G66410	33	1	other cellular processes
AT1G33390	33	1	other cellular processes
AT3G01890	33	1	other cellular processes
AT3G06460	33	1	other cellular processes
AT3G21060	33	1	other cellular processes
AT3G04610	33	1	other cellular processes
AT5G09530	33	1	other cellular processes
AT1G56100	33	0.15	other cellular processes
AT1G56100	28	0.85	other biological processes
AT1G73330	33	1	other cellular processes
AT1G73325	33	1	other cellular processes
AT1G17860	33	1	other cellular processes
AT1G27470	33	1	other cellular processes
AT5G06630	33	1	other cellular processes
AT2G24980	33	1	other cellular processes
AT3G05270	33	1	other cellular processes
AT1G21680	33	1	other cellular processes
AT3G48800	35	0.23	transport
AT3G48800	33	0.45	other cellular processes
AT3G48800	41	0.03	cell organization and biogenesis
AT3G48800	36	0.02	protein metabolism
AT3G48800	37	0.03	response to stress
AT3G48800	40	0.01	response to abiotic or biotic stimulus
AT3G48800	44	0.04	developmental processes
AT3G48800	34	0.11	other metabolic processes
AT3G48800	28	0.05	other biological processes
AT3G48800	39	0.01	signal transduction
AT3G48800	42	0.01	electron transport or energy pathways
AT3G48800	38	0.01	DNA or RNA metabolism
AT2G42780	33	1	other cellular processes
AT1G73040	33	1	other cellular processes
AT5G41970	33	1	other cellular processes
AT1G26100	33	1	other cellular processes
AT1G67550	33	1	other cellular processes
AT3G58510	33	1	other cellular processes
AT5G23740	33	1	other cellular processes
AT4G16790	33	1	other cellular processes
AT1G12640	33	1	other cellular processes
AT4G21470	33	1	other cellular processes
AT1G17070	33	1	other cellular processes
AT3G62940	33	1	other cellular processes
AT1G06720	33	1	other cellular processes
AT5G16200	33	1	other cellular processes
AT2G34357	33	1	other cellular processes
AT5G14600	33	1	other cellular processes
AT2G03870	33	1	other cellular processes
AT1G43810	33	1	other cellular processes
AT3G08000	33	1	other cellular processes
AT3G07050	33	1	other cellular processes
AT1G57600	33	1	other cellular processes
AT3G26410	33	1	other cellular processes
AT4G04800	33	1	other cellular processes
AT1G60710	33	1	other cellular processes
AT1G60680	33	1	other cellular processes
AT1G72320	33	1	other cellular processes
AT1G06640	33	1	other cellular processes
AT4G15020	33	1	other cellular processes
AT3G18790	33	1	other cellular processes
AT2G31170	33	1	other cellular processes
AT3G54590	33	1	other cellular processes
AT1G04980	33	1	other cellular processes
AT4G10040	33	1	other cellular processes
AT2G22690	33	1	other cellular processes
AT4G07410	33	1	other cellular processes
AT1G47620	34	1	other metabolic processes
AT3G28550	33	1	other cellular processes
AT5G15550	33	1	other cellular processes
AT4G02330	33	1	other cellular processes
AT2G13650	33	1	other cellular processes
AT4G16765	33	1	other cellular processes
AT5G46840	33	1	other cellular processes
AT1G80190	33	1	other cellular processes
AT4G08400	33	1	other cellular processes
AT1G42440	33	1	other cellular processes
AT1G03370	33	1	other cellular processes
AT1G01930	33	1	other cellular processes
AT2G26695	33	1	other cellular processes
AT1G22210	33	1	other cellular processes
AT1G70590	33	1	other cellular processes
AT3G29160	33	1	other cellular processes
AT4G22150	33	1	other cellular processes
AT1G63050	33	1	other cellular processes
AT1G24090	33	1	other cellular processes
AT2G38740	33	1	other cellular processes
AT1G65030	33	1	other cellular processes
AT3G20800	33	1	other cellular processes
AT1G76810	33	1	other cellular processes
AT4G19210	33	1	other cellular processes
AT4G12040	33	1	other cellular processes
AT2G17180	33	1	other cellular processes
AT1G73570	33	1	other cellular processes
AT3G54580	33	1	other cellular processes
AT1G48760	33	1	other cellular processes
AT2G23820	33	1	other cellular processes
AT1G32340	33	1	other cellular processes
AT1G77050	33	1	other cellular processes
AT1G22910	33	1	other cellular processes
AT4G34270	33	1	other cellular processes
AT3G11450	33	1	other cellular processes
AT2G39320	33	1	other cellular processes
AT1G34380	33	1	other cellular processes
AT2G47010	33	1	other cellular processes
AT4G32175	33	1	other cellular processes
AT2G31040	33	1	other cellular processes
AT3G22220	35	0.05	transport
AT3G22220	33	0.24	other cellular processes
AT3G22220	41	0.18	cell organization and biogenesis
AT3G22220	36	0.12	protein metabolism
AT3G22220	37	0.1	response to stress
AT3G22220	40	0.06	response to abiotic or biotic stimulus
AT3G22220	44	0.02	developmental processes
AT3G22220	34	0.12	other metabolic processes
AT3G22220	28	0.06	other biological processes
AT3G22220	42	0.02	electron transport or energy pathways
AT3G22220	38	0.03	DNA or RNA metabolism
AT2G30040	36	1	protein metabolism
AT2G02870	33	1	other cellular processes
AT1G22040	33	1	other cellular processes
AT1G26090	33	1	other cellular processes
AT1G23720	33	1	other cellular processes
AT5G60390	33	1	other cellular processes
AT2G35410	33	1	other cellular processes
AT4G12600	33	1	other cellular processes
AT1G55270	33	1	other cellular processes
AT3G07590	33	1	other cellular processes
AT3G29130	33	1	other cellular processes
AT4G02840	33	1	other cellular processes
AT1G75560	33	1	other cellular processes
AT4G21490	33	1	other cellular processes
AT1G76870	33	1	other cellular processes
AT4G30990	33	1	other cellular processes
AT3G24900	33	1	other cellular processes
AT2G47115	33	1	other cellular processes
AT2G32090	34	1	other metabolic processes
AT4G39520	33	1	other cellular processes
AT1G34140	33	1	other cellular processes
AT5G03220	33	1	other cellular processes
AT1G03840	33	1	other cellular processes
ATMG00810	35	0.06	transport
ATMG00810	33	0.07	other cellular processes
ATMG00810	41	0.07	cell organization and biogenesis
ATMG00810	36	0.31	protein metabolism
ATMG00810	37	0.08	response to stress
ATMG00810	40	0.04	response to abiotic or biotic stimulus
ATMG00810	44	0.03	developmental processes
ATMG00810	34	0.06	other metabolic processes
ATMG00810	28	0.07	other biological processes
ATMG00810	39	0.04	signal transduction
ATMG00810	42	0.1	electron transport or energy pathways
ATMG00810	38	0.07	DNA or RNA metabolism
AT4G20220	35	0.06	transport
AT4G20220	33	0.07	other cellular processes
AT4G20220	41	0.07	cell organization and biogenesis
AT4G20220	36	0.31	protein metabolism
AT4G20220	37	0.08	response to stress
AT4G20220	40	0.04	response to abiotic or biotic stimulus
AT4G20220	44	0.03	developmental processes
AT4G20220	34	0.06	other metabolic processes
AT4G20220	28	0.07	other biological processes
AT4G20220	39	0.04	signal transduction
AT4G20220	42	0.1	electron transport or energy pathways
AT4G20220	38	0.07	DNA or RNA metabolism
AT2G18245	35	0.1	transport
AT2G18245	33	0.1	other cellular processes
AT2G18245	41	0.04	cell organization and biogenesis
AT2G18245	36	0.03	protein metabolism
AT2G18245	37	0.09	response to stress
AT2G18245	40	0.08	response to abiotic or biotic stimulus
AT2G18245	44	0.14	developmental processes
AT2G18245	34	0.07	other metabolic processes
AT2G18245	28	0.1	other biological processes
AT2G18245	39	0.12	signal transduction
AT2G18245	42	0.05	electron transport or energy pathways
AT2G18245	38	0.08	DNA or RNA metabolism
AT1G10657	35	0.05	transport
AT1G10657	33	0.02	other cellular processes
AT1G10657	41	0.09	cell organization and biogenesis
AT1G10657	36	0.07	protein metabolism
AT1G10657	37	0.11	response to stress
AT1G10657	40	0.14	response to abiotic or biotic stimulus
AT1G10657	44	0.11	developmental processes
AT1G10657	34	0.07	other metabolic processes
AT1G10657	28	0.1	other biological processes
AT1G10657	39	0.07	signal transduction
AT1G10657	42	0.04	electron transport or energy pathways
AT1G10657	38	0.13	DNA or RNA metabolism
AT1G27060	33	1	other cellular processes
AT3G22980	33	1	other cellular processes
AT3G12480	33	1	other cellular processes
AT5G42010	33	1	other cellular processes
AT2G30800	33	1	other cellular processes
AT1G06670	33	1	other cellular processes
AT1G14620	33	1	other cellular processes
AT1G69295	33	1	other cellular processes
AT3G62530	33	1	other cellular processes
AT1G76460	33	1	other cellular processes
AT1G65540	33	1	other cellular processes
AT3G58180	33	1	other cellular processes
AT3G19020	33	1	other cellular processes
AT4G24130	33	1	other cellular processes
AT5G08565	33	1	other cellular processes
AT1G20690	33	1	other cellular processes
AT3G06760	33	0.96	other cellular processes
AT3G06760	34	0.04	other metabolic processes
AT5G41820	33	1	other cellular processes
AT3G25010	33	1	other cellular processes
AT5G61330	33	1	other cellular processes
AT1G71200	33	1	other cellular processes
AT1G71360	33	1	other cellular processes
AT1G22882	33	1	other cellular processes
AT2G25280	33	1	other cellular processes
AT2G03470	33	1	other cellular processes
AT4G17270	33	1	other cellular processes
AT1G77460	33	1	other cellular processes
AT1G44120	33	1	other cellular processes
AT1G61080	33	1	other cellular processes
AT5G06160	33	1	other cellular processes
AT4G09950	33	1	other cellular processes
AT3G23890	33	1	other cellular processes
AT1G60730	33	1	other cellular processes
AT5G50960	33	1	other cellular processes
AT5G15750	33	1	other cellular processes
AT3G56570	33	1	other cellular processes
AT3G52150	33	1	other cellular processes
AT5G10070	33	1	other cellular processes
AT1G60690	33	1	other cellular processes
AT1G55150	33	1	other cellular processes
AT2G27200	33	1	other cellular processes
AT3G52270	33	1	other cellular processes
AT1G67210	33	1	other cellular processes
AT5G66630	37	1	response to stress
AT1G68610	33	1	other cellular processes
AT5G61150	33	1	other cellular processes
AT3G58580	33	1	other cellular processes
AT4G00990	33	0.12	other cellular processes
AT4G00990	40	0.01	response to abiotic or biotic stimulus
AT4G00990	44	0.84	developmental processes
AT4G00990	28	0.03	other biological processes
AT4G00700	33	1	other cellular processes
AT3G57940	33	1	other cellular processes
AT3G25470	33	1	other cellular processes
AT1G54500	33	1	other cellular processes
AT5G66610	37	1	response to stress
AT3G04640	33	1	other cellular processes
AT1G59860	33	1	other cellular processes
AT1G09640	33	1	other cellular processes
AT4G15396	34	1	other metabolic processes
AT3G28956	33	1	other cellular processes
AT3G26500	33	1	other cellular processes
AT5G36270	33	1	other cellular processes
AT3G50130	33	1	other cellular processes
AT5G25780	33	1	other cellular processes
AT1G03530	33	1	other cellular processes
AT4G14000	33	1	other cellular processes
AT3G14050	33	1	other cellular processes
AT3G24870	37	1	response to stress
AT3G26740	33	1	other cellular processes
AT2G21260	33	1	other cellular processes
AT5G66620	37	1	response to stress
AT2G03667	33	1	other cellular processes
AT2G39050	33	1	other cellular processes
AT1G76310	33	1	other cellular processes
AT4G23950	33	1	other cellular processes
AT2G20800	33	1	other cellular processes
AT4G11790	33	1	other cellular processes
AT5G17270	33	1	other cellular processes
AT3G02600	33	1	other cellular processes
AT4G28940	33	1	other cellular processes
AT3G18220	33	1	other cellular processes
AT3G14080	33	1	other cellular processes
AT4G31520	33	1	other cellular processes
AT4G18900	33	1	other cellular processes
AT2G19260	33	1	other cellular processes
AT1G02840	33	1	other cellular processes
AT1G69380	33	1	other cellular processes
AT2G26810	33	1	other cellular processes
AT4G02430	33	1	other cellular processes
AT3G57000	33	1	other cellular processes
AT1G78460	35	0.08	transport
AT1G78460	33	0.12	other cellular processes
AT1G78460	41	0.06	cell organization and biogenesis
AT1G78460	36	0.01	protein metabolism
AT1G78460	37	0.09	response to stress
AT1G78460	40	0.09	response to abiotic or biotic stimulus
AT1G78460	44	0.27	developmental processes
AT1G78460	34	0.12	other metabolic processes
AT1G78460	28	0.06	other biological processes
AT1G78460	39	0.04	signal transduction
AT1G78460	42	0.02	electron transport or energy pathways
AT1G78460	38	0.04	DNA or RNA metabolism
AT2G35660	33	1	other cellular processes
AT5G19970	33	1	other cellular processes
AT1G45332	33	1	other cellular processes
AT3G59810	33	1	other cellular processes
AT3G49830	33	1	other cellular processes
AT2G43810	33	1	other cellular processes
AT1G62840	33	1	other cellular processes
AT3G06890	33	1	other cellular processes
AT2G16060	33	0.95	other cellular processes
AT2G16060	34	0.02	other metabolic processes
AT2G16060	28	0.03	other biological processes
AT1G51200	33	1	other cellular processes
AT1G17160	33	1	other cellular processes
AT1G15380	34	1	other metabolic processes
AT4G16660	33	1	other cellular processes
AT5G03340	33	1	other cellular processes
AT4G18230	33	1	other cellular processes
AT4G18593	33	1	other cellular processes
AT4G22820	33	1	other cellular processes
AT2G37510	33	1	other cellular processes
AT4G00540	33	1	other cellular processes
AT3G15970	33	1	other cellular processes
AT4G09490	33	1	other cellular processes
AT3G27640	33	1	other cellular processes
AT1G12470	33	1	other cellular processes
AT4G01023	37	1	response to stress
AT3G44190	33	1	other cellular processes
AT4G17410	33	1	other cellular processes
AT4G01560	33	1	other cellular processes
AT5G43720	33	1	other cellular processes
AT1G30810	33	0.12	other cellular processes
AT1G30810	40	0.01	response to abiotic or biotic stimulus
AT1G30810	44	0.84	developmental processes
AT1G30810	28	0.03	other biological processes
AT1G08620	33	0.12	other cellular processes
AT1G08620	40	0.01	response to abiotic or biotic stimulus
AT1G08620	44	0.84	developmental processes
AT1G08620	28	0.03	other biological processes
AT2G40840	33	1	other cellular processes
AT2G22100	33	1	other cellular processes
AT3G55380	33	1	other cellular processes
AT3G13230	33	1	other cellular processes
AT2G29780	33	1	other cellular processes
AT1G17330	33	1	other cellular processes
AT3G18860	33	1	other cellular processes
AT4G22310	33	1	other cellular processes
AT2G27650	33	1	other cellular processes
AT1G13330	33	1	other cellular processes
AT1G72050	33	1	other cellular processes
AT1G47500	33	1	other cellular processes
AT1G63800	33	1	other cellular processes
AT1G14260	33	1	other cellular processes
AT5G60790	33	1	other cellular processes
AT2G17250	33	1	other cellular processes
AT2G17930	33	1	other cellular processes
AT5G65900	33	1	other cellular processes
AT2G43370	33	1	other cellular processes
AT3G16650	33	1	other cellular processes
AT5G03900	33	1	other cellular processes
AT4G39870	33	1	other cellular processes
AT2G36260	33	1	other cellular processes
AT2G21940	33	1	other cellular processes
AT2G07360	35	0.01	transport
AT2G07360	33	0.57	other cellular processes
AT2G07360	39	0.42	signal transduction
AT2G05590	33	1	other cellular processes
AT1G54070	35	0.09	transport
AT1G54070	33	0.08	other cellular processes
AT1G54070	41	0.09	cell organization and biogenesis
AT1G54070	36	0.07	protein metabolism
AT1G54070	37	0.11	response to stress
AT1G54070	40	0.21	response to abiotic or biotic stimulus
AT1G54070	44	0.12	developmental processes
AT1G54070	34	0.03	other metabolic processes
AT1G54070	28	0.03	other biological processes
AT1G54070	39	0.05	signal transduction
AT1G54070	42	0.06	electron transport or energy pathways
AT1G54070	38	0.06	DNA or RNA metabolism
AT1G33265	33	1	other cellular processes
AT1G31440	33	1	other cellular processes
AT1G25988	33	1	other cellular processes
AT1G08005	33	1	other cellular processes
AT1G13690	33	1	other cellular processes
AT1G12970	33	1	other cellular processes
AT1G05670	34	1	other metabolic processes
AT1G10210	36	1	protein metabolism
AT5G27640	33	1	other cellular processes
AT1G78955	33	1	other cellular processes
AT5G06260	33	1	other cellular processes
AT4G34070	33	1	other cellular processes
AT1G09660	33	1	other cellular processes
AT3G53800	33	1	other cellular processes
AT3G24430	33	1	other cellular processes
AT3G09380	33	1	other cellular processes
AT1G68310	33	1	other cellular processes
AT1G11475	33	1	other cellular processes
AT1G19730	33	1	other cellular processes
AT3G12260	33	1	other cellular processes
AT4G27600	33	0.88	other cellular processes
AT4G27600	34	0.12	other metabolic processes
AT1G49350	33	0.86	other cellular processes
AT1G49350	34	0.12	other metabolic processes
AT1G49350	42	0.02	electron transport or energy pathways
AT5G25490	33	1	other cellular processes
AT4G36960	33	1	other cellular processes
AT2G25870	33	1	other cellular processes
AT3G48520	34	1	other metabolic processes
AT5G19300	33	1	other cellular processes
AT3G13640	33	1	other cellular processes
AT5G01380	33	1	other cellular processes
AT2G19990	34	1	other metabolic processes
AT3G10730	33	1	other cellular processes
AT3G50580	35	1	transport
AT4G12790	33	1	other cellular processes
AT5G62600	33	1	other cellular processes
AT4G19810	33	1	other cellular processes
AT5G17930	33	1	other cellular processes
AT1G61000	33	1	other cellular processes
AT4G20330	33	1	other cellular processes
AT2G44640	33	1	other cellular processes
AT2G30400	33	1	other cellular processes
AT2G36940	33	1	other cellular processes
AT2G33410	33	1	other cellular processes
AT1G61150	33	1	other cellular processes
AT1G11110	33	1	other cellular processes
AT1G18630	33	1	other cellular processes
AT1G25290	33	0.05	other cellular processes
AT1G25290	36	0.95	protein metabolism
AT1G11780	33	1	other cellular processes
AT1G49600	33	1	other cellular processes
AT1G72660	33	1	other cellular processes
AT1G75690	33	1	other cellular processes
AT5G06000	33	1	other cellular processes
AT1G76300	33	1	other cellular processes
AT3G44120	28	1	other biological processes
AT2G07140	28	1	other biological processes
AT2G18740	33	1	other cellular processes
AT1G54080	33	1	other cellular processes
AT2G43450	33	1	other cellular processes
AT1G17790	33	1	other cellular processes
AT1G17370	33	1	other cellular processes
AT1G73540	33	1	other cellular processes
AT3G47490	33	1	other cellular processes
AT1G73230	33	1	other cellular processes
AT4G36850	33	1	other cellular processes
AT2G17705	33	1	other cellular processes
AT1G30580	33	1	other cellular processes
AT4G10480	33	1	other cellular processes
AT4G22550	33	1	other cellular processes
AT3G50920	33	1	other cellular processes
AT1G17880	33	1	other cellular processes
AT5G03580	33	1	other cellular processes
AT4G28820	33	1	other cellular processes
AT1G31160	33	1	other cellular processes
AT3G25410	33	1	other cellular processes
AT3G56160	33	1	other cellular processes
AT4G21220	33	1	other cellular processes
AT1G66680	33	1	other cellular processes
AT2G33330	33	1	other cellular processes
AT4G20100	33	1	other cellular processes
AT4G30220	33	1	other cellular processes
AT2G41050	33	1	other cellular processes
AT1G21120	33	1	other cellular processes
AT5G19750	33	1	other cellular processes
AT2G45700	33	0.82	other cellular processes
AT2G45700	36	0.02	protein metabolism
AT2G45700	37	0.03	response to stress
AT2G45700	40	0.01	response to abiotic or biotic stimulus
AT2G45700	34	0.11	other metabolic processes
AT2G45700	38	0.01	DNA or RNA metabolism
AT1G69210	33	1	other cellular processes
AT5G30495	33	1	other cellular processes
AT1G33890	33	1	other cellular processes
AT1G33040	33	1	other cellular processes
AT4G21610	33	1	other cellular processes
AT4G39890	33	1	other cellular processes
AT1G10810	33	1	other cellular processes
AT4G11060	33	1	other cellular processes
AT3G18580	33	1	other cellular processes
AT1G31010	33	1	other cellular processes
AT1G78950	33	1	other cellular processes
AT1G49150	33	1	other cellular processes
AT1G06710	33	1	other cellular processes
AT4G29440	33	1	other cellular processes
AT3G01410	33	1	other cellular processes
AT4G34412	33	1	other cellular processes
AT1G75200	33	1	other cellular processes
AT3G17120	33	1	other cellular processes
AT2G25730	33	0.95	other cellular processes
AT2G25730	34	0.02	other metabolic processes
AT2G25730	28	0.03	other biological processes
AT1G53280	33	1	other cellular processes
AT2G23930	33	1	other cellular processes
AT3G02065	33	1	other cellular processes
AT1G10300	33	1	other cellular processes
AT1G60930	33	1	other cellular processes
AT1G01220	33	1	other cellular processes
AT2G18690	33	1	other cellular processes
ATCG00830	33	1	other cellular processes
AT4G23070	33	0.05	other cellular processes
AT4G23070	36	0.95	protein metabolism
AT1G54390	33	1	other cellular processes
AT1G22330	33	1	other cellular processes
AT5G16930	33	1	other cellular processes
AT4G30260	33	1	other cellular processes
AT2G18840	33	1	other cellular processes
AT4G15410	33	1	other cellular processes
AT3G05280	33	1	other cellular processes
AT2G37150	33	1	other cellular processes
AT1G65990	33	1	other cellular processes
AT1G05350	33	1	other cellular processes
AT3G53460	33	1	other cellular processes
AT1G68230	33	1	other cellular processes
AT2G36300	33	1	other cellular processes
AT5G02050	33	1	other cellular processes
AT3G15450	33	1	other cellular processes
AT2G42220	33	1	other cellular processes
AT1G14310	33	1	other cellular processes
AT3G52760	33	1	other cellular processes
AT2G18660	33	1	other cellular processes
AT5G05210	33	1	other cellular processes
AT4G27000	33	1	other cellular processes
AT2G39805	33	1	other cellular processes
AT2G22170	33	0.2	other cellular processes
AT2G22170	37	0.05	response to stress
AT2G22170	44	0.02	developmental processes
AT2G22170	28	0.73	other biological processes
AT2G43020	33	1	other cellular processes
AT1G55390	33	1	other cellular processes
AT2G46780	33	1	other cellular processes
AT1G78260	33	1	other cellular processes
AT1G80490	33	1	other cellular processes
AT3G05760	33	1	other cellular processes
AT3G62560	33	1	other cellular processes
ATCG01230	33	1	other cellular processes
ATCG00905	33	1	other cellular processes
AT1G14300	33	1	other cellular processes
AT3G18190	33	1	other cellular processes
AT1G54580	33	1	other cellular processes
AT5G41760	34	1	other metabolic processes
AT5G40670	33	1	other cellular processes
AT5G15390	33	1	other cellular processes
AT4G38020	33	1	other cellular processes
AT4G17610	33	1	other cellular processes
AT4G15520	33	1	other cellular processes
AT4G07390	33	1	other cellular processes
AT3G06180	33	0.41	other cellular processes
AT3G06180	36	0.22	protein metabolism
AT3G06180	34	0.37	other metabolic processes
AT3G05100	33	1	other cellular processes
AT2G43235	35	1	transport
AT2G39725	33	0.99	other cellular processes
AT2G39725	34	0.01	other metabolic processes
AT2G26200	33	1	other cellular processes
AT2G20725	33	1	other cellular processes
AT2G03140	33	1	other cellular processes
AT1G76065	33	0.99	other cellular processes
AT1G76065	34	0.01	other metabolic processes
AT1G76060	33	0.99	other cellular processes
AT1G76060	34	0.01	other metabolic processes
AT1G54310	33	1	other cellular processes
AT1G29120	33	1	other cellular processes
AT1G24267	35	0.06	transport
AT1G24267	33	0.11	other cellular processes
AT1G24267	41	0.06	cell organization and biogenesis
AT1G24267	36	0.06	protein metabolism
AT1G24267	37	0.09	response to stress
AT1G24267	40	0.11	response to abiotic or biotic stimulus
AT1G24267	44	0.06	developmental processes
AT1G24267	34	0.06	other metabolic processes
AT1G24267	28	0.06	other biological processes
AT1G24267	39	0.1	signal transduction
AT1G24267	42	0.16	electron transport or energy pathways
AT1G24267	38	0.07	DNA or RNA metabolism
AT1G24265	35	0.06	transport
AT1G24265	33	0.11	other cellular processes
AT1G24265	41	0.06	cell organization and biogenesis
AT1G24265	36	0.06	protein metabolism
AT1G24265	37	0.09	response to stress
AT1G24265	40	0.11	response to abiotic or biotic stimulus
AT1G24265	44	0.06	developmental processes
AT1G24265	34	0.06	other metabolic processes
AT1G24265	28	0.06	other biological processes
AT1G24265	39	0.1	signal transduction
AT1G24265	42	0.16	electron transport or energy pathways
AT1G24265	38	0.07	DNA or RNA metabolism
AT1G14270	33	1	other cellular processes
AT1G13590	33	1	other cellular processes
AT1G12060	33	0.97	other cellular processes
AT1G12060	37	0.01	response to stress
AT1G12060	40	0.01	response to abiotic or biotic stimulus
AT1G12060	44	0.01	developmental processes
AT1G11230	33	0.02	other cellular processes
AT1G11230	37	0.1	response to stress
AT1G11230	40	0.88	response to abiotic or biotic stimulus
AT1G11210	33	0.02	other cellular processes
AT1G11210	37	0.1	response to stress
AT1G11210	40	0.88	response to abiotic or biotic stimulus
AT1G09980	33	1	other cellular processes
AT4G10110	33	1	other cellular processes
AT2G32500	33	1	other cellular processes
AT3G13224	33	1	other cellular processes
AT2G26970	33	1	other cellular processes
AT3G23080	33	1	other cellular processes
AT1G07990	33	1	other cellular processes
AT4G29520	33	1	other cellular processes
AT1G76170	33	1	other cellular processes
AT2G36930	33	1	other cellular processes
AT2G42520	33	1	other cellular processes
AT1G80440	33	1	other cellular processes
AT1G71300	33	1	other cellular processes
ATMG00080	33	1	other cellular processes
AT1G14570	33	1	other cellular processes
AT1G79920	33	1	other cellular processes
AT2G28820	33	1	other cellular processes
AT3G28870	33	1	other cellular processes
AT1G27430	33	1	other cellular processes
AT1G24300	33	1	other cellular processes
AT3G15280	33	1	other cellular processes
AT5G14170	33	1	other cellular processes
AT5G01320	33	1	other cellular processes
AT2G28420	34	1	other metabolic processes
AT3G09580	33	1	other cellular processes
AT1G60650	33	1	other cellular processes
AT2G07785	34	1	other metabolic processes
AT3G08810	33	1	other cellular processes
AT1G14880	33	1	other cellular processes
AT5G18490	33	1	other cellular processes
AT3G05670	33	1	other cellular processes
AT1G78090	33	1	other cellular processes
AT2G22190	33	1	other cellular processes
AT5G20600	33	1	other cellular processes
AT4G38780	33	1	other cellular processes
AT5G01780	33	1	other cellular processes
AT1G55330	33	1	other cellular processes
AT1G71280	33	1	other cellular processes
AT1G52800	33	1	other cellular processes
AT2G31305	33	1	other cellular processes
AT5G40810	33	1	other cellular processes
AT2G36010	33	1	other cellular processes
AT2G41250	33	1	other cellular processes
AT2G28400	33	1	other cellular processes
AT1G50670	33	1	other cellular processes
AT4G22590	33	1	other cellular processes
AT4G12430	33	1	other cellular processes
AT3G06483	33	1	other cellular processes
AT2G24020	33	1	other cellular processes
AT1G06560	36	1	protein metabolism
AT3G60450	33	1	other cellular processes
AT1G76690	33	1	other cellular processes
ATCG00780	33	1	other cellular processes
AT1G32210	33	1	other cellular processes
AT5G17440	33	1	other cellular processes
AT4G02450	33	1	other cellular processes
ATCG01300	33	1	other cellular processes
AT4G03450	33	1	other cellular processes
AT2G24500	33	1	other cellular processes
AT3G03773	33	1	other cellular processes
AT5G48570	33	1	other cellular processes
AT3G06470	33	1	other cellular processes
ATCG00810	33	1	other cellular processes
AT5G26180	36	1	protein metabolism
AT1G28395	33	1	other cellular processes
AT3G26360	33	1	other cellular processes
AT3G24880	37	1	response to stress
AT1G53790	33	1	other cellular processes
AT1G12600	33	1	other cellular processes
AT5G37530	33	1	other cellular processes
AT1G54770	33	1	other cellular processes
AT1G76010	33	1	other cellular processes
AT1G29250	33	1	other cellular processes
AT1G20220	33	1	other cellular processes
AT2G29020	33	1	other cellular processes
AT5G14730	33	1	other cellular processes
AT3G10820	33	0.98	other cellular processes
AT3G10820	34	0.02	other metabolic processes
AT5G26700	33	0.36	other cellular processes
AT5G26700	37	0.01	response to stress
AT5G26700	40	0.01	response to abiotic or biotic stimulus
AT5G26700	44	0.06	developmental processes
AT5G26700	28	0.56	other biological processes
AT2G28680	33	0.36	other cellular processes
AT2G28680	37	0.01	response to stress
AT2G28680	40	0.01	response to abiotic or biotic stimulus
AT2G28680	44	0.06	developmental processes
AT2G28680	28	0.56	other biological processes
AT1G07750	33	0.36	other cellular processes
AT1G07750	37	0.01	response to stress
AT1G07750	40	0.01	response to abiotic or biotic stimulus
AT1G07750	44	0.06	developmental processes
AT1G07750	28	0.56	other biological processes
AT1G03890	33	0.36	other cellular processes
AT1G03890	37	0.01	response to stress
AT1G03890	40	0.01	response to abiotic or biotic stimulus
AT1G03890	44	0.06	developmental processes
AT1G03890	28	0.56	other biological processes
AT1G02335	33	0.36	other cellular processes
AT1G02335	37	0.01	response to stress
AT1G02335	40	0.01	response to abiotic or biotic stimulus
AT1G02335	44	0.06	developmental processes
AT1G02335	28	0.56	other biological processes
AT1G35550	33	1	other cellular processes
AT3G55070	33	1	other cellular processes
AT4G20520	33	0.34	other cellular processes
AT4G20520	34	0.5	other metabolic processes
AT4G20520	38	0.16	DNA or RNA metabolism
AT2G16480	33	1	other cellular processes
ATCG00790	33	1	other cellular processes
ATCG00750	33	1	other cellular processes
AT5G41910	33	1	other cellular processes
AT2G33090	33	0.98	other cellular processes
AT2G33090	34	0.02	other metabolic processes
AT2G32820	33	0.98	other cellular processes
AT2G32820	34	0.02	other metabolic processes
AT2G27780	33	0.98	other cellular processes
AT2G27780	34	0.02	other metabolic processes
AT2G13640	33	0.98	other cellular processes
AT2G13640	34	0.02	other metabolic processes
AT1G06470	33	1	other cellular processes
AT5G53000	33	1	other cellular processes
AT2G19830	33	1	other cellular processes
AT1G11660	33	1	other cellular processes
AT3G05790	33	1	other cellular processes
AT1G67650	33	1	other cellular processes
AT1G23465	33	1	other cellular processes
AT5G26860	33	1	other cellular processes
AT4G17620	33	1	other cellular processes
AT5G55450	33	1	other cellular processes
AT3G27560	36	1	protein metabolism
AT2G18090	33	1	other cellular processes
AT1G78660	33	1	other cellular processes
AT2G21690	33	1	other cellular processes
AT2G27470	33	1	other cellular processes
AT2G32650	33	1	other cellular processes
AT2G32180	33	1	other cellular processes
AT1G74900	33	1	other cellular processes
AT2G15910	33	1	other cellular processes
AT2G17190	33	1	other cellular processes
AT1G02410	33	1	other cellular processes
AT2G47850	33	1	other cellular processes
AT3G54210	33	1	other cellular processes
AT5G19310	33	1	other cellular processes
AT3G47480	33	1	other cellular processes
AT2G32720	34	1	other metabolic processes
AT2G17200	33	1	other cellular processes
AT1G05530	34	1	other metabolic processes
AT3G14280	33	1	other cellular processes
ATMG00980	33	1	other cellular processes
AT3G15690	33	1	other cellular processes
AT1G03240	28	1	other biological processes
AT1G03200	28	1	other biological processes
AT4G27070	33	1	other cellular processes
ATCG00770	33	1	other cellular processes
AT3G05780	33	1	other cellular processes
AT4G15393	34	1	other metabolic processes
AT4G11160	33	1	other cellular processes
AT1G52670	33	1	other cellular processes
AT1G17220	33	1	other cellular processes
AT2G14890	33	1	other cellular processes
AT4G33250	33	1	other cellular processes
AT3G48420	33	1	other cellular processes
AT2G38000	33	1	other cellular processes
AT4G16970	33	1	other cellular processes
AT5G58770	33	1	other cellular processes
AT3G18090	33	1	other cellular processes
AT5G26940	33	1	other cellular processes
AT5G07710	33	1	other cellular processes
AT4G39810	33	1	other cellular processes
AT1G74390	33	1	other cellular processes
AT1G21160	33	1	other cellular processes
AT2G30140	34	1	other metabolic processes
AT2G24170	33	1	other cellular processes
AT5G27420	33	1	other cellular processes
AT4G28750	33	1	other cellular processes
AT2G27580	33	1	other cellular processes
AT5G58780	33	1	other cellular processes
AT5G64830	33	1	other cellular processes
AT1G27750	33	1	other cellular processes
AT2G23400	33	1	other cellular processes
AT3G29430	33	1	other cellular processes
AT5G50310	33	1	other cellular processes
AT2G27700	33	1	other cellular processes
AT2G18620	33	1	other cellular processes
AT5G58782	33	1	other cellular processes
AT3G32040	33	1	other cellular processes
AT4G32915	33	1	other cellular processes
AT1G67620	33	1	other cellular processes
AT5G61390	33	1	other cellular processes
AT5G05540	33	1	other cellular processes
AT4G38460	33	1	other cellular processes
AT2G47350	33	1	other cellular processes
AT3G06660	33	1	other cellular processes
AT5G58784	33	1	other cellular processes
AT5G49370	35	0.2	transport
AT5G49370	33	0.41	other cellular processes
AT5G49370	34	0.39	other metabolic processes
AT5G05520	33	1	other cellular processes
AT5G04020	33	1	other cellular processes
AT3G62630	33	1	other cellular processes
AT3G54570	33	1	other cellular processes
AT3G44160	33	1	other cellular processes
AT3G30240	33	0.1	other cellular processes
AT3G30240	36	0.19	protein metabolism
AT3G30240	37	0.27	response to stress
AT3G30240	44	0.01	developmental processes
AT3G30240	34	0.19	other metabolic processes
AT3G30240	39	0.24	signal transduction
AT3G27880	33	1	other cellular processes
AT3G15380	33	1	other cellular processes
AT3G11070	33	1	other cellular processes
AT3G04440	33	1	other cellular processes
AT3G03700	33	1	other cellular processes
AT2G38800	33	1	other cellular processes
AT2G34120	33	1	other cellular processes
AT2G32310	33	1	other cellular processes
AT2G26530	33	1	other cellular processes
AT2G15760	33	1	other cellular processes
AT2G05530	33	1	other cellular processes
AT2G05510	33	1	other cellular processes
AT2G05440	33	1	other cellular processes
AT2G05380	33	1	other cellular processes
AT2G04690	33	1	other cellular processes
AT1G75550	33	1	other cellular processes
AT1G70420	33	1	other cellular processes
AT1G61160	33	0.1	other cellular processes
AT1G61160	36	0.19	protein metabolism
AT1G61160	37	0.27	response to stress
AT1G61160	44	0.01	developmental processes
AT1G61160	34	0.19	other metabolic processes
AT1G61160	39	0.24	signal transduction
AT1G51560	33	1	other cellular processes
AT1G41860	33	0.1	other cellular processes
AT1G41860	36	0.19	protein metabolism
AT1G41860	37	0.27	response to stress
AT1G41860	44	0.01	developmental processes
AT1G41860	34	0.19	other metabolic processes
AT1G41860	39	0.24	signal transduction
AT1G36550	33	0.1	other cellular processes
AT1G36550	36	0.19	protein metabolism
AT1G36550	37	0.27	response to stress
AT1G36550	44	0.01	developmental processes
AT1G36550	34	0.19	other metabolic processes
AT1G36550	39	0.24	signal transduction
AT1G35860	33	1	other cellular processes
AT1G32720	33	1	other cellular processes
AT1G32710	33	1	other cellular processes
AT1G29620	33	1	other cellular processes
AT1G23710	33	1	other cellular processes
ATMG00090	33	1	other cellular processes
AT2G23410	33	1	other cellular processes
AT1G76825	33	1	other cellular processes
AT5G41700	33	1	other cellular processes
AT3G56130	33	1	other cellular processes
AT2G03690	33	1	other cellular processes
AT2G26930	33	1	other cellular processes
AT2G39340	33	1	other cellular processes
AT2G17740	33	1	other cellular processes
ATCG00760	33	1	other cellular processes
AT5G37130	33	1	other cellular processes
AT1G30960	33	1	other cellular processes
AT1G50480	33	1	other cellular processes
AT1G68370	33	1	other cellular processes
AT5G60500	33	1	other cellular processes
AT2G42080	33	1	other cellular processes
AT1G43670	33	1	other cellular processes
AT1G72416	33	1	other cellular processes
AT5G40310	33	1	other cellular processes
AT3G27970	33	1	other cellular processes
AT2G48100	33	1	other cellular processes
AT5G45010	33	1	other cellular processes
AT1G78355	33	0.99	other cellular processes
AT1G78355	38	0.01	DNA or RNA metabolism
AT1G54930	33	0.99	other cellular processes
AT1G54930	38	0.01	DNA or RNA metabolism
AT1G17277	33	0.99	other cellular processes
AT1G17277	38	0.01	DNA or RNA metabolism
AT2G32350	33	0.38	other cellular processes
AT2G32350	36	0.02	protein metabolism
AT2G32350	37	0.22	response to stress
AT2G32350	34	0.01	other metabolic processes
AT2G32350	38	0.37	DNA or RNA metabolism
AT5G18820	33	1	other cellular processes
AT5G60040	33	1	other cellular processes
AT5G60510	33	1	other cellular processes
AT1G66960	33	1	other cellular processes
AT1G60140	33	1	other cellular processes
AT1G23870	33	1	other cellular processes
AT3G09310	33	1	other cellular processes
AT1G06960	33	1	other cellular processes
ATCG01310	33	1	other cellular processes
AT1G04130	33	1	other cellular processes
AT1G32920	33	1	other cellular processes
AT5G45020	33	1	other cellular processes
AT1G30130	34	1	other metabolic processes
AT3G52660	33	1	other cellular processes
AT2G17570	33	1	other cellular processes
AT3G13020	35	0.02	transport
AT3G13020	33	0.93	other cellular processes
AT3G13020	41	0.01	cell organization and biogenesis
AT3G13020	36	0.03	protein metabolism
AT3G13020	44	0.01	developmental processes
AT1G36095	35	0.02	transport
AT1G36095	33	0.93	other cellular processes
AT1G36095	41	0.01	cell organization and biogenesis
AT1G36095	36	0.03	protein metabolism
AT1G36095	44	0.01	developmental processes
AT2G01430	33	1	other cellular processes
AT2G12290	33	1	other cellular processes
AT4G05210	33	1	other cellular processes
AT4G17770	33	1	other cellular processes
AT3G45020	33	1	other cellular processes
AT3G29639	33	1	other cellular processes
AT1G58080	33	1	other cellular processes
AT1G07615	33	1	other cellular processes
AT2G04900	33	1	other cellular processes
AT1G56300	33	1	other cellular processes
AT2G18720	33	1	other cellular processes
AT1G49380	33	1	other cellular processes
AT1G06410	33	1	other cellular processes
AT1G52510	33	1	other cellular processes
AT1G69680	33	1	other cellular processes
AT1G63550	37	1	response to stress
AT4G04950	33	1	other cellular processes
AT1G56460	33	1	other cellular processes
AT5G16540	33	1	other cellular processes
AT3G02830	33	1	other cellular processes
AT3G14200	33	1	other cellular processes
AT1G32780	37	1	response to stress
AT5G40530	33	1	other cellular processes
AT1G47580	33	1	other cellular processes
AT1G61640	33	1	other cellular processes
AT2G32170	33	1	other cellular processes
AT2G35680	33	1	other cellular processes
AT2G22800	33	1	other cellular processes
AT2G21090	33	1	other cellular processes
AT4G20860	33	1	other cellular processes
AT1G10320	33	1	other cellular processes
AT5G43680	33	1	other cellular processes
AT1G22440	37	1	response to stress
AT1G04640	33	1	other cellular processes
AT3G57890	33	1	other cellular processes
AT2G42230	33	1	other cellular processes
AT3G56880	33	0.99	other cellular processes
AT3G56880	37	0.01	response to stress
AT4G21210	33	1	other cellular processes
AT2G37790	33	1	other cellular processes
AT3G28750	33	0.95	other cellular processes
AT3G28750	34	0.02	other metabolic processes
AT3G28750	28	0.03	other biological processes
AT5G21090	33	1	other cellular processes
AT3G44785	33	1	other cellular processes
AT3G54380	33	1	other cellular processes
AT4G39040	33	1	other cellular processes
AT3G01200	33	1	other cellular processes
AT4G16120	33	1	other cellular processes
AT3G51520	33	0.82	other cellular processes
AT3G51520	34	0.18	other metabolic processes
AT5G23330	33	1	other cellular processes
AT3G12930	33	1	other cellular processes
AT3G10270	33	1	other cellular processes
AT2G39190	33	1	other cellular processes
AT3G10690	33	1	other cellular processes
AT3G04500	37	1	response to stress
AT1G11390	33	1	other cellular processes
AT5G09570	33	1	other cellular processes
AT1G69750	33	1	other cellular processes
AT1G66590	33	1	other cellular processes
AT1G61790	33	1	other cellular processes
AT3G62780	33	1	other cellular processes
AT2G10560	33	1	other cellular processes
AT1G33660	37	1	response to stress
AT3G02450	33	1	other cellular processes
AT1G18600	33	0.05	other cellular processes
AT1G18600	36	0.95	protein metabolism
AT5G57590	33	1	other cellular processes
AT4G16580	33	1	other cellular processes
AT2G21350	33	1	other cellular processes
AT3G25130	33	1	other cellular processes
AT5G03300	33	1	other cellular processes
AT3G48770	35	0.02	transport
AT3G48770	33	0.93	other cellular processes
AT3G48770	41	0.01	cell organization and biogenesis
AT3G48770	36	0.03	protein metabolism
AT3G48770	44	0.01	developmental processes
AT3G17450	35	0.05	transport
AT3G17450	33	0.24	other cellular processes
AT3G17450	41	0.18	cell organization and biogenesis
AT3G17450	36	0.12	protein metabolism
AT3G17450	37	0.1	response to stress
AT3G17450	40	0.06	response to abiotic or biotic stimulus
AT3G17450	44	0.02	developmental processes
AT3G17450	34	0.12	other metabolic processes
AT3G17450	28	0.06	other biological processes
AT3G17450	42	0.02	electron transport or energy pathways
AT3G17450	38	0.03	DNA or RNA metabolism
AT3G52340	33	1	other cellular processes
AT2G30660	33	1	other cellular processes
AT1G71000	33	1	other cellular processes
AT3G17970	33	1	other cellular processes
AT3G05380	33	1	other cellular processes
AT4G14930	33	1	other cellular processes
AT1G65230	33	1	other cellular processes
AT1G72880	33	1	other cellular processes
AT2G01690	33	1	other cellular processes
AT4G20360	33	1	other cellular processes
AT3G53570	36	1	protein metabolism
AT5G10840	33	1	other cellular processes
AT3G46500	33	1	other cellular processes
AT3G23310	33	1	other cellular processes
AT1G73800	33	1	other cellular processes
AT1G27530	33	1	other cellular processes
AT1G78510	33	1	other cellular processes
AT3G14690	33	1	other cellular processes
AT2G30650	33	1	other cellular processes
AT1G59660	33	1	other cellular processes
AT1G70985	33	0.65	other cellular processes
AT1G70985	41	0.01	cell organization and biogenesis
AT1G70985	36	0.23	protein metabolism
AT1G70985	37	0.01	response to stress
AT1G70985	44	0.01	developmental processes
AT1G70985	34	0.02	other metabolic processes
AT1G70985	39	0.05	signal transduction
AT1G70985	38	0.02	DNA or RNA metabolism
AT1G67460	36	1	protein metabolism
AT1G49820	33	1	other cellular processes
AT2G20650	33	1	other cellular processes
AT1G42480	33	1	other cellular processes
AT1G06060	33	1	other cellular processes
AT3G52380	33	1	other cellular processes
AT4G38640	33	1	other cellular processes
AT5G10910	33	1	other cellular processes
AT2G42650	33	1	other cellular processes
AT1G56050	33	1	other cellular processes
AT3G24190	33	1	other cellular processes
AT1G79890	33	1	other cellular processes
AT1G15990	33	1	other cellular processes
AT1G62970	33	1	other cellular processes
AT3G14660	33	1	other cellular processes
AT2G29700	33	1	other cellular processes
AT1G77730	33	1	other cellular processes
AT1G73480	33	1	other cellular processes
AT1G18360	33	1	other cellular processes
AT5G38900	33	1	other cellular processes
AT3G06290	33	1	other cellular processes
AT2G18465	33	1	other cellular processes
AT1G09070	33	1	other cellular processes
AT1G15780	33	1	other cellular processes
AT4G33100	33	1	other cellular processes
AT1G20080	33	1	other cellular processes
AT3G55850	33	1	other cellular processes
AT1G23840	33	1	other cellular processes
AT1G62040	33	1	other cellular processes
AT4G04340	33	1	other cellular processes
AT2G36145	33	1	other cellular processes
AT2G29720	33	1	other cellular processes
AT3G09670	33	1	other cellular processes
AT1G18500	33	1	other cellular processes
AT3G06170	33	1	other cellular processes
AT1G06450	33	1	other cellular processes
AT1G18100	33	1	other cellular processes
AT3G02280	33	1	other cellular processes
AT2G31955	33	1	other cellular processes
AT5G63460	33	1	other cellular processes
AT5G40720	33	1	other cellular processes
AT4G37420	33	1	other cellular processes
AT4G20170	33	1	other cellular processes
AT4G17650	33	1	other cellular processes
AT4G01883	33	0.99	other cellular processes
AT4G01883	34	0.01	other metabolic processes
AT4G01650	33	0.99	other cellular processes
AT4G01650	34	0.01	other metabolic processes
AT3G62130	33	1	other cellular processes
AT3G07380	33	1	other cellular processes
AT2G33570	33	1	other cellular processes
AT2G16760	33	1	other cellular processes
AT2G01410	33	1	other cellular processes
AT2G01070	33	1	other cellular processes
AT1G74790	33	1	other cellular processes
AT1G72480	33	1	other cellular processes
AT1G67780	33	1	other cellular processes
AT1G67270	33	1	other cellular processes
AT1G61670	33	1	other cellular processes
AT1G27200	33	1	other cellular processes
AT1G10980	33	1	other cellular processes
AT1G02475	33	0.99	other cellular processes
AT1G02475	34	0.01	other metabolic processes
AT1G02470	33	0.99	other cellular processes
AT1G02470	34	0.01	other metabolic processes
AT1G02160	33	1	other cellular processes
AT2G44660	33	1	other cellular processes
AT2G20280	33	1	other cellular processes
AT1G67850	33	1	other cellular processes
AT2G38140	33	1	other cellular processes
AT1G27030	33	1	other cellular processes
AT5G51080	33	1	other cellular processes
AT1G51580	33	1	other cellular processes
AT5G27720	33	1	other cellular processes
AT4G10160	33	1	other cellular processes
AT4G10150	33	1	other cellular processes
AT1G30515	33	1	other cellular processes
AT5G57300	33	1	other cellular processes
AT1G55805	33	1	other cellular processes
AT3G04260	33	1	other cellular processes
AT2G20230	33	1	other cellular processes
AT3G27330	33	1	other cellular processes
AT2G47380	33	1	other cellular processes
AT1G76860	33	1	other cellular processes
AT4G21090	33	1	other cellular processes
AT4G39680	33	1	other cellular processes
AT3G52750	33	1	other cellular processes
AT1G22080	33	1	other cellular processes
AT1G21190	33	1	other cellular processes
AT1G35470	33	1	other cellular processes
AT1G60230	33	1	other cellular processes
AT2G45270	33	1	other cellular processes
AT2G44150	33	1	other cellular processes
AT5G53680	33	1	other cellular processes
AT4G30620	33	1	other cellular processes
AT1G72160	33	1	other cellular processes
AT3G27120	33	1	other cellular processes
AT2G17880	33	1	other cellular processes
AT2G34410	33	1	other cellular processes
AT2G19380	33	1	other cellular processes
AT2G28540	33	1	other cellular processes
AT2G27775	33	1	other cellular processes
AT4G10130	33	1	other cellular processes
AT5G09850	33	0.98	other cellular processes
AT5G09850	34	0.02	other metabolic processes
AT1G10520	33	1	other cellular processes
AT1G65950	33	1	other cellular processes
AT2G16780	33	1	other cellular processes
AT4G30330	33	1	other cellular processes
AT2G24540	33	1	other cellular processes
AT3G03500	33	1	other cellular processes
AT3G11500	33	1	other cellular processes
AT3G02720	33	1	other cellular processes
AT2G20630	36	1	protein metabolism
AT1G80480	33	1	other cellular processes
AT1G26520	33	1	other cellular processes
AT5G56900	33	1	other cellular processes
AT5G01300	33	1	other cellular processes
AT4G20370	33	1	other cellular processes
AT2G27550	33	1	other cellular processes
AT1G72290	33	1	other cellular processes
AT2G36250	33	1	other cellular processes
AT1G48530	33	1	other cellular processes
AT3G07700	33	1	other cellular processes
AT3G59690	33	1	other cellular processes
AT4G19580	33	1	other cellular processes
AT3G52780	33	1	other cellular processes
AT2G16430	33	1	other cellular processes
AT1G56360	33	1	other cellular processes
AT1G52940	33	1	other cellular processes
AT1G72710	36	1	protein metabolism
AT3G12550	33	1	other cellular processes
AT1G80790	33	1	other cellular processes
AT1G13790	33	1	other cellular processes
AT5G38690	33	1	other cellular processes
AT1G28420	33	1	other cellular processes
AT4G33070	33	1	other cellular processes
AT2G14285	33	1	other cellular processes
AT4G35050	33	1	other cellular processes
AT3G13380	33	1	other cellular processes
AT5G19820	33	1	other cellular processes
AT4G09350	33	1	other cellular processes
AT1G15790	33	1	other cellular processes
AT5G59370	33	1	other cellular processes
AT1G02590	33	0.9	other cellular processes
AT1G02590	34	0.1	other metabolic processes
AT4G12640	33	1	other cellular processes
AT2G25640	33	1	other cellular processes
AT1G11950	33	0.12	other cellular processes
AT1G11950	40	0.01	response to abiotic or biotic stimulus
AT1G11950	44	0.84	developmental processes
AT1G11950	28	0.03	other biological processes
AT1G62310	33	0.12	other cellular processes
AT1G62310	40	0.01	response to abiotic or biotic stimulus
AT1G62310	44	0.84	developmental processes
AT1G62310	28	0.03	other biological processes
AT3G20930	33	1	other cellular processes
AT5G22760	33	1	other cellular processes
AT5G11100	33	1	other cellular processes
AT5G04220	33	1	other cellular processes
AT1G11930	33	1	other cellular processes
AT5G04340	33	1	other cellular processes
AT2G22670	33	1	other cellular processes
AT1G34420	33	1	other cellular processes
AT5G05200	33	1	other cellular processes
AT3G58620	33	1	other cellular processes
AT4G14730	33	1	other cellular processes
AT2G01870	33	1	other cellular processes
AT4G09340	33	1	other cellular processes
AT4G00830	33	1	other cellular processes
AT5G01330	33	1	other cellular processes
AT2G41700	33	1	other cellular processes
AT4G09310	33	1	other cellular processes
AT4G09200	33	1	other cellular processes
AT4G26860	33	1	other cellular processes
AT3G49730	33	1	other cellular processes
AT1G54320	33	1	other cellular processes
AT1G78200	36	1	protein metabolism
AT5G05440	37	0.81	response to stress
AT5G05440	40	0.16	response to abiotic or biotic stimulus
AT5G05440	34	0.01	other metabolic processes
AT5G05440	28	0.02	other biological processes
AT2G34740	36	1	protein metabolism
AT4G39120	33	1	other cellular processes
AT3G63150	33	1	other cellular processes
AT1G17050	33	1	other cellular processes
AT1G66880	33	1	other cellular processes
AT1G64750	33	1	other cellular processes
AT1G67680	33	1	other cellular processes
AT2G27690	34	1	other metabolic processes
AT3G54600	33	1	other cellular processes
AT3G53880	33	1	other cellular processes
AT3G15390	33	1	other cellular processes
AT1G54410	33	1	other cellular processes
AT4G15310	34	1	other metabolic processes
AT1G70400	33	1	other cellular processes
AT1G64740	33	1	other cellular processes
AT5G07570	33	1	other cellular processes
AT3G52390	33	1	other cellular processes
AT4G32360	33	1	other cellular processes
AT3G58570	33	1	other cellular processes
AT4G39330	33	1	other cellular processes
AT2G21890	33	1	other cellular processes
AT5G11010	33	1	other cellular processes
AT1G03457	33	1	other cellular processes
AT2G21730	33	1	other cellular processes
AT1G65700	33	1	other cellular processes
AT4G09300	33	1	other cellular processes
AT3G43600	33	0.9	other cellular processes
AT3G43600	34	0.1	other metabolic processes
AT2G41760	33	1	other cellular processes
AT2G42330	33	1	other cellular processes
AT5G27060	33	1	other cellular processes
AT3G50480	33	1	other cellular processes
AT2G05250	33	1	other cellular processes
AT2G05230	33	1	other cellular processes
AT1G64230	33	1	other cellular processes
AT3G17160	33	1	other cellular processes
AT2G19470	36	1	protein metabolism
AT5G24810	33	1	other cellular processes
AT1G09180	33	1	other cellular processes
AT1G09060	33	0.12	other cellular processes
AT1G09060	40	0.01	response to abiotic or biotic stimulus
AT1G09060	44	0.84	developmental processes
AT1G09060	28	0.03	other biological processes
AT4G22380	33	1	other cellular processes
AT4G28400	36	1	protein metabolism
AT2G38020	33	1	other cellular processes
AT1G27100	33	1	other cellular processes
AT1G34750	36	1	protein metabolism
AT3G18610	33	1	other cellular processes
AT3G59110	36	1	protein metabolism
AT5G40080	33	1	other cellular processes
AT5G39800	33	1	other cellular processes
AT3G23460	34	1	other metabolic processes
AT3G62460	33	1	other cellular processes
AT2G01650	33	1	other cellular processes
AT4G32620	33	1	other cellular processes
AT1G75530	33	1	other cellular processes
AT1G08410	33	1	other cellular processes
AT3G54350	33	1	other cellular processes
AT2G21530	36	1	protein metabolism
AT1G25400	33	1	other cellular processes
AT5G44500	33	1	other cellular processes
AT3G46230	33	1	other cellular processes
AT4G00231	33	1	other cellular processes
AT3G54270	33	1	other cellular processes
AT5G63550	33	1	other cellular processes
AT5G55660	33	1	other cellular processes
AT5G06480	33	0.47	other cellular processes
AT5G06480	37	0.06	response to stress
AT5G06480	40	0.28	response to abiotic or biotic stimulus
AT5G06480	44	0.01	developmental processes
AT5G06480	34	0.16	other metabolic processes
AT5G06480	28	0.02	other biological processes
AT4G32160	33	1	other cellular processes
AT3G48195	33	1	other cellular processes
AT3G44100	33	0.47	other cellular processes
AT3G44100	37	0.06	response to stress
AT3G44100	40	0.28	response to abiotic or biotic stimulus
AT3G44100	44	0.01	developmental processes
AT3G44100	34	0.16	other metabolic processes
AT3G44100	28	0.02	other biological processes
AT3G43660	35	0.02	transport
AT3G43660	33	0.66	other cellular processes
AT3G43660	41	0.09	cell organization and biogenesis
AT3G43660	36	0.03	protein metabolism
AT3G43660	37	0.05	response to stress
AT3G43660	40	0.06	response to abiotic or biotic stimulus
AT3G43660	44	0.02	developmental processes
AT3G43660	28	0.07	other biological processes
AT3G43630	35	0.02	transport
AT3G43630	33	0.66	other cellular processes
AT3G43630	41	0.09	cell organization and biogenesis
AT3G43630	36	0.03	protein metabolism
AT3G43630	37	0.05	response to stress
AT3G43630	40	0.06	response to abiotic or biotic stimulus
AT3G43630	44	0.02	developmental processes
AT3G43630	28	0.07	other biological processes
AT3G25190	35	0.02	transport
AT3G25190	33	0.66	other cellular processes
AT3G25190	41	0.09	cell organization and biogenesis
AT3G25190	36	0.03	protein metabolism
AT3G25190	37	0.05	response to stress
AT3G25190	40	0.06	response to abiotic or biotic stimulus
AT3G25190	44	0.02	developmental processes
AT3G25190	28	0.07	other biological processes
AT3G18295	35	0.06	transport
AT3G18295	33	0.37	other cellular processes
AT3G18295	41	0.03	cell organization and biogenesis
AT3G18295	36	0.05	protein metabolism
AT3G18295	37	0.05	response to stress
AT3G18295	40	0.02	response to abiotic or biotic stimulus
AT3G18295	44	0.03	developmental processes
AT3G18295	34	0.13	other metabolic processes
AT3G18295	28	0.09	other biological processes
AT3G18295	39	0.07	signal transduction
AT3G18295	42	0.07	electron transport or energy pathways
AT3G18295	38	0.03	DNA or RNA metabolism
AT3G14750	33	1	other cellular processes
AT3G11780	33	0.47	other cellular processes
AT3G11780	37	0.06	response to stress
AT3G11780	40	0.28	response to abiotic or biotic stimulus
AT3G11780	44	0.01	developmental processes
AT3G11780	34	0.16	other metabolic processes
AT3G11780	28	0.02	other biological processes
AT2G38400	33	1	other cellular processes
AT2G26370	33	0.47	other cellular processes
AT2G26370	37	0.06	response to stress
AT2G26370	40	0.28	response to abiotic or biotic stimulus
AT2G26370	44	0.01	developmental processes
AT2G26370	34	0.16	other metabolic processes
AT2G26370	28	0.02	other biological processes
AT2G24470	33	1	other cellular processes
AT2G23360	33	1	other cellular processes
AT2G16005	33	1	other cellular processes
AT2G13070	35	0.05	transport
AT2G13070	33	0.04	other cellular processes
AT2G13070	41	0.04	cell organization and biogenesis
AT2G13070	36	0.1	protein metabolism
AT2G13070	37	0.11	response to stress
AT2G13070	40	0.04	response to abiotic or biotic stimulus
AT2G13070	44	0.1	developmental processes
AT2G13070	34	0.12	other metabolic processes
AT2G13070	28	0.05	other biological processes
AT2G13070	39	0.09	signal transduction
AT2G13070	42	0.1	electron transport or energy pathways
AT2G13070	38	0.16	DNA or RNA metabolism
AT1G77580	33	1	other cellular processes
AT1G76800	35	0.02	transport
AT1G76800	33	0.66	other cellular processes
AT1G76800	41	0.09	cell organization and biogenesis
AT1G76800	36	0.03	protein metabolism
AT1G76800	37	0.05	response to stress
AT1G76800	40	0.06	response to abiotic or biotic stimulus
AT1G76800	44	0.02	developmental processes
AT1G76800	28	0.07	other biological processes
AT1G68340	35	0.06	transport
AT1G68340	33	0.37	other cellular processes
AT1G68340	41	0.03	cell organization and biogenesis
AT1G68340	36	0.05	protein metabolism
AT1G68340	37	0.05	response to stress
AT1G68340	40	0.02	response to abiotic or biotic stimulus
AT1G68340	44	0.03	developmental processes
AT1G68340	34	0.13	other metabolic processes
AT1G68340	28	0.09	other biological processes
AT1G68340	39	0.07	signal transduction
AT1G68340	42	0.07	electron transport or energy pathways
AT1G68340	38	0.03	DNA or RNA metabolism
AT1G45015	33	0.47	other cellular processes
AT1G45015	37	0.06	response to stress
AT1G45015	40	0.28	response to abiotic or biotic stimulus
AT1G45015	44	0.01	developmental processes
AT1G45015	34	0.16	other metabolic processes
AT1G45015	28	0.02	other biological processes
AT1G43870	35	0.05	transport
AT1G43870	33	0.04	other cellular processes
AT1G43870	41	0.04	cell organization and biogenesis
AT1G43870	36	0.1	protein metabolism
AT1G43870	37	0.11	response to stress
AT1G43870	40	0.04	response to abiotic or biotic stimulus
AT1G43870	44	0.1	developmental processes
AT1G43870	34	0.12	other metabolic processes
AT1G43870	28	0.05	other biological processes
AT1G43870	39	0.09	signal transduction
AT1G43870	42	0.1	electron transport or energy pathways
AT1G43870	38	0.16	DNA or RNA metabolism
AT1G21810	33	1	other cellular processes
AT1G21140	35	0.02	transport
AT1G21140	33	0.66	other cellular processes
AT1G21140	41	0.09	cell organization and biogenesis
AT1G21140	36	0.03	protein metabolism
AT1G21140	37	0.05	response to stress
AT1G21140	40	0.06	response to abiotic or biotic stimulus
AT1G21140	44	0.02	developmental processes
AT1G21140	28	0.07	other biological processes
AT3G61170	33	1	other cellular processes
AT5G22100	33	1	other cellular processes
AT5G01720	33	1	other cellular processes
AT1G30560	33	1	other cellular processes
AT3G19630	36	1	protein metabolism
AT4G35620	33	1	other cellular processes
AT2G26760	33	1	other cellular processes
AT2G17620	33	1	other cellular processes
AT1G80370	33	1	other cellular processes
AT1G16330	33	1	other cellular processes
AT1G13190	33	1	other cellular processes
AT5G13810	33	1	other cellular processes
AT4G26590	33	1	other cellular processes
AT3G08620	33	1	other cellular processes
AT1G55255	33	1	other cellular processes
AT2G15280	33	1	other cellular processes
AT2G36360	33	1	other cellular processes
AT1G76100	33	1	other cellular processes
AT1G72230	35	0.05	transport
AT1G72230	33	0.87	other cellular processes
AT1G72230	44	0.02	developmental processes
AT1G72230	34	0.02	other metabolic processes
AT1G72230	28	0.04	other biological processes
AT1G22480	35	0.05	transport
AT1G22480	33	0.87	other cellular processes
AT1G22480	44	0.02	developmental processes
AT1G22480	34	0.02	other metabolic processes
AT1G22480	28	0.04	other biological processes
AT4G14695	33	1	other cellular processes
AT1G15470	33	1	other cellular processes
AT4G14490	36	1	protein metabolism
AT2G25330	33	0.99	other cellular processes
AT2G25330	40	0.01	response to abiotic or biotic stimulus
AT2G25320	33	0.99	other cellular processes
AT2G25320	40	0.01	response to abiotic or biotic stimulus
AT1G34355	33	1	other cellular processes
AT1G22335	34	1	other metabolic processes
AT1G53540	33	1	other cellular processes
AT3G15095	33	1	other cellular processes
AT4G13720	33	1	other cellular processes
AT5G19680	33	1	other cellular processes
AT4G16442	33	1	other cellular processes
AT1G49920	33	0.04	other cellular processes
AT1G49920	40	0.96	response to abiotic or biotic stimulus
AT1G10240	33	0.04	other cellular processes
AT1G10240	40	0.96	response to abiotic or biotic stimulus
AT4G37480	33	1	other cellular processes
AT2G45500	33	1	other cellular processes
AT3G19460	33	1	other cellular processes
AT5G49380	35	0.2	transport
AT5G49380	33	0.41	other cellular processes
AT5G49380	34	0.39	other metabolic processes
AT2G45620	33	1	other cellular processes
AT2G40520	33	1	other cellular processes
AT4G38540	33	1	other cellular processes
AT1G73450	36	1	protein metabolism
AT3G13990	33	1	other cellular processes
AT3G07660	33	1	other cellular processes
AT1G29350	33	1	other cellular processes
AT1G23935	33	1	other cellular processes
AT5G05320	33	1	other cellular processes
AT1G22940	33	1	other cellular processes
AT1G61780	33	1	other cellular processes
AT4G36080	33	1	other cellular processes
AT5G19690	33	1	other cellular processes
AT3G49870	33	1	other cellular processes
AT5G12430	33	1	other cellular processes
AT2G39210	33	1	other cellular processes
AT2G06530	33	1	other cellular processes
[truncated: 15,077 more rows]

## Sheet: MF
ORF	GO ID	WPN Score	GO Term
AT1G02080	23	1	nucleotide binding
AT4G19006	19	1	hydrolase activity
AT5G45620	19	1	hydrolase activity
AT5G09900	19	1	hydrolase activity
AT1G54210	23	0.17	nucleotide binding
AT1G54210	17	0.83	other enzyme activity
AT1G29150	19	1	hydrolase activity
AT2G03430	19	1	hydrolase activity
AT1G02040	25	1	other binding
AT1G47330	20	0.05	kinase activity
AT1G47330	25	0.04	other binding
AT1G47330	18	0.18	transferase activity
AT1G47330	32	0.03	transcription factor activity
AT1G47330	17	0.12	other enzyme activity
AT1G47330	21	0.58	transporter activity
AT2G14520	20	0.05	kinase activity
AT2G14520	25	0.04	other binding
AT2G14520	18	0.18	transferase activity
AT2G14520	32	0.03	transcription factor activity
AT2G14520	17	0.12	other enzyme activity
AT2G14520	21	0.58	transporter activity
AT1G80070	22	1	DNA or RNA binding
ATCG00870	20	0.13	kinase activity
ATCG00870	25	0.08	other binding
ATCG00870	18	0.08	transferase activity
ATCG00870	19	0.07	hydrolase activity
ATCG00870	24	0.05	other molecular functions
ATCG00870	27	0.01	protein binding
ATCG00870	26	0.09	receptor binding or activity
ATCG00870	23	0.13	nucleotide binding
ATCG00870	29	0.07	structural molecule activity
ATCG00870	32	0.06	transcription factor activity
ATCG00870	22	0.07	DNA or RNA binding
ATCG00870	31	0.07	nucleic acid binding
ATCG00870	17	0.05	other enzyme activity
ATCG00870	21	0.04	transporter activity
AT3G46220	23	0.81	nucleotide binding
AT3G46220	29	0.19	structural molecule activity
AT2G17900	18	1	transferase activity
AT1G27050	23	1	nucleotide binding
ATCG00900	29	1	structural molecule activity
ATMG00490	20	0.09	kinase activity
ATMG00490	25	0.05	other binding
ATMG00490	18	0.04	transferase activity
ATMG00490	19	0.01	hydrolase activity
ATMG00490	24	0.07	other molecular functions
ATMG00490	27	0.08	protein binding
ATMG00490	26	0.05	receptor binding or activity
ATMG00490	23	0.08	nucleotide binding
ATMG00490	29	0.09	structural molecule activity
ATMG00490	32	0.11	transcription factor activity
ATMG00490	22	0.09	DNA or RNA binding
ATMG00490	31	0.05	nucleic acid binding
ATMG00490	17	0.08	other enzyme activity
ATMG00490	21	0.11	transporter activity
AT2G38230	17	1	other enzyme activity
AT2G38210	17	1	other enzyme activity
AT3G53630	20	0.01	kinase activity
AT3G53630	25	0.01	other binding
AT3G53630	18	0.1	transferase activity
AT3G53630	19	0.03	hydrolase activity
AT3G53630	24	0.06	other molecular functions
AT3G53630	27	0.05	protein binding
AT3G53630	26	0.05	receptor binding or activity
AT3G53630	23	0.02	nucleotide binding
AT3G53630	29	0.02	structural molecule activity
AT3G53630	32	0.02	transcription factor activity
AT3G53630	22	0.03	DNA or RNA binding
AT3G53630	31	0.07	nucleic acid binding
AT3G53630	21	0.53	transporter activity
AT1G55710	20	0.01	kinase activity
AT1G55710	25	0.01	other binding
AT1G55710	18	0.1	transferase activity
AT1G55710	19	0.03	hydrolase activity
AT1G55710	24	0.06	other molecular functions
AT1G55710	27	0.05	protein binding
AT1G55710	26	0.05	receptor binding or activity
AT1G55710	23	0.02	nucleotide binding
AT1G55710	29	0.02	structural molecule activity
AT1G55710	32	0.02	transcription factor activity
AT1G55710	22	0.03	DNA or RNA binding
AT1G55710	31	0.07	nucleic acid binding
AT1G55710	21	0.53	transporter activity
ATCG01000	20	0.12	kinase activity
ATCG01000	25	0.07	other binding
ATCG01000	18	0.02	transferase activity
ATCG01000	19	0.08	hydrolase activity
ATCG01000	24	0.09	other molecular functions
ATCG01000	27	0.12	protein binding
ATCG01000	26	0.08	receptor binding or activity
ATCG01000	23	0.05	nucleotide binding
ATCG01000	29	0.07	structural molecule activity
ATCG01000	32	0.02	transcription factor activity
ATCG01000	22	0.12	DNA or RNA binding
ATCG01000	31	0.02	nucleic acid binding
ATCG01000	17	0.09	other enzyme activity
ATCG01000	21	0.05	transporter activity
AT4G24820	19	1	hydrolase activity
AT3G11270	19	1	hydrolase activity
ATMG00170	20	0.07	kinase activity
ATMG00170	25	0.02	other binding
ATMG00170	18	0.04	transferase activity
ATMG00170	19	0.01	hydrolase activity
ATMG00170	24	0.01	other molecular functions
ATMG00170	27	0.01	protein binding
ATMG00170	26	0.01	receptor binding or activity
ATMG00170	23	0.66	nucleotide binding
ATMG00170	32	0.02	transcription factor activity
ATMG00170	22	0.02	DNA or RNA binding
ATMG00170	31	0.08	nucleic acid binding
ATMG00170	17	0.02	other enzyme activity
ATMG00170	21	0.03	transporter activity
AT3G51790	17	1	other enzyme activity
AT4G08685	17	1	other enzyme activity
AT5G07590	19	0.96	hydrolase activity
AT5G07590	22	0.04	DNA or RNA binding
AT1G24190	23	1	nucleotide binding
AT4G34120	20	0.05	kinase activity
AT4G34120	25	0.04	other binding
AT4G34120	18	0.18	transferase activity
AT4G34120	32	0.03	transcription factor activity
AT4G34120	17	0.12	other enzyme activity
AT4G34120	21	0.58	transporter activity
AT5G23540	19	1	hydrolase activity
AT1G72370	29	1	structural molecule activity
AT3G12860	29	1	structural molecule activity
AT4G14230	20	0.05	kinase activity
AT4G14230	25	0.04	other binding
AT4G14230	18	0.18	transferase activity
AT4G14230	32	0.03	transcription factor activity
AT4G14230	17	0.12	other enzyme activity
AT4G14230	21	0.58	transporter activity
AT1G24706	29	0.39	structural molecule activity
AT1G24706	22	0.61	DNA or RNA binding
AT4G04940	29	1	structural molecule activity
AT5G05780	19	1	hydrolase activity
AT2G40360	29	1	structural molecule activity
AT3G10400	22	1	DNA or RNA binding
AT1G03360	29	1	structural molecule activity
AT1G60780	29	1	structural molecule activity
AT1G19270	23	1	nucleotide binding
AT4G14240	20	0.05	kinase activity
AT4G14240	25	0.04	other binding
AT4G14240	18	0.18	transferase activity
AT4G14240	32	0.03	transcription factor activity
AT4G14240	17	0.12	other enzyme activity
AT4G14240	21	0.58	transporter activity
AT3G15460	29	1	structural molecule activity
AT2G44510	29	1	structural molecule activity
AT4G28200	29	1	structural molecule activity
AT3G60240	29	1	structural molecule activity
AT3G51730	17	1	other enzyme activity
AT2G39830	23	1	nucleotide binding
AT3G45970	17	1	other enzyme activity
AT1G13160	29	1	structural molecule activity
AT3G22660	29	1	structural molecule activity
AT1G71440	23	1	nucleotide binding
AT1G03330	22	1	DNA or RNA binding
AT1G49540	23	1	nucleotide binding
AT5G20290	29	1	structural molecule activity
AT1G52930	29	1	structural molecule activity
AT3G05060	29	1	structural molecule activity
AT5G11500	20	0.47	kinase activity
AT5G11500	17	0.53	other enzyme activity
AT4G36860	23	1	nucleotide binding
AT3G11890	25	0.03	other binding
AT3G11890	18	0.07	transferase activity
AT3G11890	19	0.06	hydrolase activity
AT3G11890	24	0.02	other molecular functions
AT3G11890	27	0.04	protein binding
AT3G11890	26	0.01	receptor binding or activity
AT3G11890	23	0.06	nucleotide binding
AT3G11890	29	0.03	structural molecule activity
AT3G11890	32	0.03	transcription factor activity
AT3G11890	22	0.09	DNA or RNA binding
AT3G11890	31	0.05	nucleic acid binding
AT3G11890	17	0.19	other enzyme activity
AT3G11890	21	0.32	transporter activity
AT1G16030	23	1	nucleotide binding
AT1G10730	29	1	structural molecule activity
AT3G59650	29	1	structural molecule activity
AT3G48380	20	0.03	kinase activity
AT3G48380	25	0.04	other binding
AT3G48380	18	0.04	transferase activity
AT3G48380	19	0.39	hydrolase activity
AT3G48380	24	0.01	other molecular functions
AT3G48380	27	0.02	protein binding
AT3G48380	26	0.02	receptor binding or activity
AT3G48380	23	0.12	nucleotide binding
AT3G48380	29	0.12	structural molecule activity
AT3G48380	32	0.12	transcription factor activity
AT3G48380	22	0.04	DNA or RNA binding
AT3G48380	31	0.04	nucleic acid binding
AT3G48380	17	0.01	other enzyme activity
AT1G61040	22	1	DNA or RNA binding
AT2G21270	17	1	other enzyme activity
AT2G31410	29	1	structural molecule activity
AT2G05630	17	1	other enzyme activity
AT3G13940	29	1	structural molecule activity
AT2G28860	17	1	other enzyme activity
AT1G51730	29	1	structural molecule activity
AT2G32070	23	1	nucleotide binding
AT2G46230	29	1	structural molecule activity
AT3G04770	29	1	structural molecule activity
AT3G58560	23	1	nucleotide binding
AT1G28060	22	1	DNA or RNA binding
AT1G27752	25	0.88	other binding
AT1G27752	22	0.06	DNA or RNA binding
AT1G27752	17	0.06	other enzyme activity
AT2G11000	23	1	nucleotide binding
AT1G21500	17	1	other enzyme activity
AT4G21660	22	1	DNA or RNA binding
AT1G03860	29	1	structural molecule activity
AT1G79730	22	1	DNA or RNA binding
AT1G61010	22	1	DNA or RNA binding
AT3G56640	23	1	nucleotide binding
AT2G18220	29	1	structural molecule activity
AT3G02520	23	0.51	nucleotide binding
AT3G02520	17	0.49	other enzyme activity
AT5G43500	23	1	nucleotide binding
AT3G01160	29	1	structural molecule activity
AT3G25100	23	1	nucleotide binding
AT1G60170	22	1	DNA or RNA binding
AT1G76490	17	1	other enzyme activity
AT5G13680	23	1	nucleotide binding
AT1G63810	29	1	structural molecule activity
AT3G63460	23	1	nucleotide binding
AT3G13970	23	0.17	nucleotide binding
AT3G13970	17	0.83	other enzyme activity
AT3G07760	25	0.03	other binding
AT3G07760	18	0.07	transferase activity
AT3G07760	19	0.06	hydrolase activity
AT3G07760	24	0.02	other molecular functions
AT3G07760	27	0.04	protein binding
AT3G07760	26	0.01	receptor binding or activity
AT3G07760	23	0.06	nucleotide binding
AT3G07760	29	0.03	structural molecule activity
AT3G07760	32	0.03	transcription factor activity
AT3G07760	22	0.09	DNA or RNA binding
AT3G07760	31	0.05	nucleic acid binding
AT3G07760	17	0.19	other enzyme activity
AT3G07760	21	0.32	transporter activity
AT1G68650	29	1	structural molecule activity
AT5G10960	23	1	nucleotide binding
AT1G10490	29	1	structural molecule activity
AT2G34050	29	1	structural molecule activity
AT4G37280	23	1	nucleotide binding
AT1G18340	22	1	DNA or RNA binding
AT1G63780	29	1	structural molecule activity
AT4G18905	29	1	structural molecule activity
AT3G42179	20	0.02	kinase activity
AT3G42179	25	0.07	other binding
AT3G42179	18	0.12	transferase activity
AT3G42179	19	0.1	hydrolase activity
AT3G42179	24	0.14	other molecular functions
AT3G42179	27	0.07	protein binding
AT3G42179	26	0.11	receptor binding or activity
AT3G42179	23	0.11	nucleotide binding
AT3G42179	29	0.03	structural molecule activity
AT3G42179	32	0.06	transcription factor activity
AT3G42179	22	0.07	DNA or RNA binding
AT3G42179	31	0.02	nucleic acid binding
AT3G42179	17	0.05	other enzyme activity
AT3G42179	21	0.03	transporter activity
AT3G16990	20	0.13	kinase activity
AT3G16990	25	0.06	other binding
AT3G16990	18	0.15	transferase activity
AT3G16990	24	0.03	other molecular functions
AT3G16990	27	0.03	protein binding
AT3G16990	26	0.05	receptor binding or activity
AT3G16990	23	0.04	nucleotide binding
AT3G16990	29	0.03	structural molecule activity
AT3G16990	32	0.02	transcription factor activity
AT3G16990	22	0.06	DNA or RNA binding
AT3G16990	31	0.02	nucleic acid binding
AT3G16990	17	0.36	other enzyme activity
AT3G16990	21	0.02	transporter activity
AT3G09090	20	0.11	kinase activity
AT3G09090	25	0.04	other binding
AT3G09090	18	0.06	transferase activity
AT3G09090	19	0.04	hydrolase activity
AT3G09090	24	0.04	other molecular functions
AT3G09090	27	0.07	protein binding
AT3G09090	26	0.04	receptor binding or activity
AT3G09090	23	0.03	nucleotide binding
AT3G09090	29	0.05	structural molecule activity
AT3G09090	32	0.07	transcription factor activity
AT3G09090	22	0.07	DNA or RNA binding
AT3G09090	31	0.1	nucleic acid binding
AT3G09090	17	0.11	other enzyme activity
AT3G09090	21	0.17	transporter activity
AT1G69485	18	0.82	transferase activity
AT1G69485	17	0.18	other enzyme activity
AT1G04900	17	1	other enzyme activity
AT1G50010	23	0.61	nucleotide binding
AT1G50010	29	0.39	structural molecule activity
AT3G07100	23	1	nucleotide binding
AT2G10440	22	1	DNA or RNA binding
AT3G23620	29	1	structural molecule activity
AT1G10580	22	1	DNA or RNA binding
AT1G08780	27	1	protein binding
AT3G56990	29	1	structural molecule activity
AT1G05055	22	1	DNA or RNA binding
AT4G30820	17	1	other enzyme activity
AT1G09760	22	1	DNA or RNA binding
AT2G40430	29	1	structural molecule activity
AT1G60430	23	0.56	nucleotide binding
AT1G60430	29	0.44	structural molecule activity
AT1G26450	23	1	nucleotide binding
AT3G62580	17	1	other enzyme activity
AT1G69070	29	1	structural molecule activity
AT3G45630	23	1	nucleotide binding
AT1G20970	23	1	nucleotide binding
AT1G73530	22	1	DNA or RNA binding
AT1G13120	23	1	nucleotide binding
AT1G03350	22	1	DNA or RNA binding
AT1G72100	20	0.05	kinase activity
AT1G72100	25	0.06	other binding
AT1G72100	18	0.1	transferase activity
AT1G72100	19	0.22	hydrolase activity
AT1G72100	24	0.09	other molecular functions
AT1G72100	27	0.06	protein binding
AT1G72100	26	0.04	receptor binding or activity
AT1G72100	23	0.07	nucleotide binding
AT1G72100	29	0.04	structural molecule activity
AT1G72100	32	0.03	transcription factor activity
AT1G72100	22	0.05	DNA or RNA binding
AT1G72100	31	0.04	nucleic acid binding
AT1G72100	17	0.13	other enzyme activity
AT1G72100	21	0.02	transporter activity
AT1G29970	29	1	structural molecule activity
ATCG00065	29	1	structural molecule activity
AT5G25757	22	1	DNA or RNA binding
AT5G25754	22	1	DNA or RNA binding
AT4G33666	17	1	other enzyme activity
AT1G73840	29	1	structural molecule activity
AT4G13860	22	1	DNA or RNA binding
AT3G52590	29	1	structural molecule activity
AT4G04210	17	1	other enzyme activity
AT5G28740	22	1	DNA or RNA binding
AT1G23100	17	1	other enzyme activity
AT2G37770	17	1	other enzyme activity
AT2G37990	29	1	structural molecule activity
AT3G59630	29	1	structural molecule activity
AT2G06040	22	1	DNA or RNA binding
AT4G39220	23	1	nucleotide binding
AT2G19385	29	1	structural molecule activity
AT5G03850	29	1	structural molecule activity
AT4G10710	22	1	DNA or RNA binding
AT3G13180	20	1	kinase activity
AT1G10030	17	1	other enzyme activity
AT4G14300	22	1	DNA or RNA binding
AT1G03140	23	0.6	nucleotide binding
AT1G03140	29	0.4	structural molecule activity
AT1G71820	23	1	nucleotide binding
AT1G56110	29	1	structural molecule activity
AT1G49340	18	1	transferase activity
AT1G07810	19	0.01	hydrolase activity
AT1G07810	23	0.99	nucleotide binding
AT5G19440	17	1	other enzyme activity
AT2G31670	17	1	other enzyme activity
AT1G51360	17	1	other enzyme activity
AT3G60360	29	1	structural molecule activity
AT5G08420	29	1	structural molecule activity
AT1G60970	29	1	structural molecule activity
AT3G05000	23	1	nucleotide binding
AT5G06680	27	0.98	protein binding
AT5G06680	29	0.02	structural molecule activity
AT2G34570	29	1	structural molecule activity
AT1G72440	29	1	structural molecule activity
AT5G54750	23	1	nucleotide binding
AT1G12270	25	1	other binding
AT1G23280	29	1	structural molecule activity
AT2G23810	25	0.06	other binding
AT2G23810	17	0.94	other enzyme activity
AT2G21440	29	1	structural molecule activity
AT2G25355	29	1	structural molecule activity
AT4G02400	29	1	structural molecule activity
AT5G35080	23	0.09	nucleotide binding
AT5G35080	22	0.91	DNA or RNA binding
AT2G18510	22	1	DNA or RNA binding
AT1G52980	29	1	structural molecule activity
AT5G64760	19	1	hydrolase activity
AT1G25520	29	1	structural molecule activity
AT2G03820	29	1	structural molecule activity
AT1G04230	29	1	structural molecule activity
AT4G04910	23	1	nucleotide binding
AT2G28360	29	1	structural molecule activity
AT1G66500	22	1	DNA or RNA binding
AT1G04400	17	1	other enzyme activity
AT1G03475	17	1	other enzyme activity
AT1G28330	17	1	other enzyme activity
AT3G16680	18	0.49	transferase activity
AT3G16680	22	0.51	DNA or RNA binding
AT3G21350	29	1	structural molecule activity
AT3G03340	22	1	DNA or RNA binding
AT1G11240	29	1	structural molecule activity
AT1G05500	29	1	structural molecule activity
AT4G10790	23	1	nucleotide binding
AT1G47490	22	1	DNA or RNA binding
AT1G31660	29	1	structural molecule activity
AT3G10090	29	1	structural molecule activity
AT1G07840	29	1	structural molecule activity
AT2G43650	29	1	structural molecule activity
AT3G54690	25	0.04	other binding
AT3G54690	18	0.18	transferase activity
AT3G54690	17	0.78	other enzyme activity
AT1G12650	29	1	structural molecule activity
AT4G20030	22	1	DNA or RNA binding
AT1G30070	17	1	other enzyme activity
AT1G03270	20	0.05	kinase activity
AT1G03270	25	0.04	other binding
AT1G03270	18	0.18	transferase activity
AT1G03270	32	0.03	transcription factor activity
AT1G03270	17	0.12	other enzyme activity
AT1G03270	21	0.58	transporter activity
AT2G26990	19	0.96	hydrolase activity
AT2G26990	22	0.04	DNA or RNA binding
AT1G79150	29	1	structural molecule activity
AT4G24440	22	1	DNA or RNA binding
AT5G09860	23	1	nucleotide binding
AT2G22400	20	1	kinase activity
AT4G19610	29	1	structural molecule activity
AT1G27290	17	1	other enzyme activity
AT1G60770	17	1	other enzyme activity
AT1G73320	29	1	structural molecule activity
AT3G53890	29	1	structural molecule activity
AT1G72240	25	0.13	other binding
AT1G72240	17	0.87	other enzyme activity
AT1G15010	17	1	other enzyme activity
AT1G05460	17	1	other enzyme activity
AT5G61770	29	1	structural molecule activity
AT1G19120	22	1	DNA or RNA binding
AT1G48130	17	1	other enzyme activity
AT1G22270	29	1	structural molecule activity
AT3G08930	23	1	nucleotide binding
AT5G01460	23	1	nucleotide binding
AT1G78190	29	1	structural molecule activity
AT3G52580	29	1	structural molecule activity
AT1G28080	17	1	other enzyme activity
AT2G20690	29	1	structural molecule activity
AT2G25110	17	1	other enzyme activity
AT3G19130	22	1	DNA or RNA binding
AT4G02690	17	1	other enzyme activity
AT1G65970	17	1	other enzyme activity
AT1G60740	17	1	other enzyme activity
AT3G24080	29	1	structural molecule activity
AT5G23680	25	0.03	other binding
AT5G23680	18	0.07	transferase activity
AT5G23680	19	0.06	hydrolase activity
AT5G23680	24	0.02	other molecular functions
AT5G23680	27	0.04	protein binding
AT5G23680	26	0.01	receptor binding or activity
AT5G23680	23	0.06	nucleotide binding
AT5G23680	29	0.03	structural molecule activity
AT5G23680	32	0.03	transcription factor activity
AT5G23680	22	0.09	DNA or RNA binding
AT5G23680	31	0.05	nucleic acid binding
AT5G23680	17	0.19	other enzyme activity
AT5G23680	21	0.32	transporter activity
AT3G07170	25	0.03	other binding
AT3G07170	18	0.07	transferase activity
AT3G07170	19	0.06	hydrolase activity
AT3G07170	24	0.02	other molecular functions
AT3G07170	27	0.04	protein binding
AT3G07170	26	0.01	receptor binding or activity
AT3G07170	23	0.06	nucleotide binding
AT3G07170	29	0.03	structural molecule activity
AT3G07170	32	0.03	transcription factor activity
AT3G07170	22	0.09	DNA or RNA binding
AT3G07170	31	0.05	nucleic acid binding
AT3G07170	17	0.19	other enzyme activity
AT3G07170	21	0.32	transporter activity
AT1G70180	25	0.03	other binding
AT1G70180	18	0.07	transferase activity
AT1G70180	19	0.06	hydrolase activity
AT1G70180	24	0.02	other molecular functions
AT1G70180	27	0.04	protein binding
AT1G70180	26	0.01	receptor binding or activity
AT1G70180	23	0.06	nucleotide binding
AT1G70180	29	0.03	structural molecule activity
AT1G70180	32	0.03	transcription factor activity
AT1G70180	22	0.09	DNA or RNA binding
AT1G70180	31	0.05	nucleic acid binding
AT1G70180	17	0.19	other enzyme activity
AT1G70180	21	0.32	transporter activity
AT1G22920	19	0.43	hydrolase activity
AT1G22920	22	0.04	DNA or RNA binding
AT1G22920	17	0.53	other enzyme activity
AT2G47640	22	1	DNA or RNA binding
AT2G38710	17	1	other enzyme activity
AT1G20580	22	1	DNA or RNA binding
AT5G41190	29	1	structural molecule activity
AT1G73430	23	1	nucleotide binding
AT1G49880	19	0.43	hydrolase activity
AT1G49880	22	0.02	DNA or RNA binding
AT1G49880	17	0.55	other enzyme activity
AT3G59550	23	1	nucleotide binding
AT1G03280	22	1	DNA or RNA binding
AT3G15353	17	1	other enzyme activity
AT2G22870	23	1	nucleotide binding
AT3G14100	22	1	DNA or RNA binding
AT5G05010	23	1	nucleotide binding
AT1G56590	23	0.92	nucleotide binding
AT1G56590	22	0.08	DNA or RNA binding
AT1G26530	29	1	structural molecule activity
AT1G19020	25	0.06	other binding
AT1G19020	17	0.94	other enzyme activity
AT2G31190	17	1	other enzyme activity
AT1G66510	22	1	DNA or RNA binding
AT1G55130	23	0.98	nucleotide binding
AT1G55130	29	0.02	structural molecule activity
AT1G75140	18	0.21	transferase activity
AT1G75140	22	0.79	DNA or RNA binding
AT5G54900	22	1	DNA or RNA binding
AT2G40900	29	0.24	structural molecule activity
AT2G40900	17	0.76	other enzyme activity
AT3G56450	25	0.35	other binding
AT3G56450	27	0.08	protein binding
AT3G56450	23	0.46	nucleotide binding
AT3G56450	17	0.11	other enzyme activity
AT2G41110	23	1	nucleotide binding
AT5G16730	19	0.87	hydrolase activity
AT5G16730	23	0.13	nucleotide binding
AT4G24300	20	0.07	kinase activity
AT4G24300	25	0.06	other binding
AT4G24300	18	0.01	transferase activity
AT4G24300	19	0.06	hydrolase activity
AT4G24300	24	0.08	other molecular functions
AT4G24300	27	0.1	protein binding
AT4G24300	26	0.06	receptor binding or activity
AT4G24300	23	0.15	nucleotide binding
AT4G24300	29	0.04	structural molecule activity
AT4G24300	32	0.11	transcription factor activity
AT4G24300	22	0.08	DNA or RNA binding
AT4G24300	31	0.05	nucleic acid binding
AT4G24300	17	0.08	other enzyme activity
AT4G24300	21	0.05	transporter activity
AT4G00895	25	0.55	other binding
AT4G00895	21	0.45	transporter activity
AT3G09390	17	1	other enzyme activity
AT1G52590	19	0.79	hydrolase activity
AT1G52590	31	0.21	nucleic acid binding
AT1G03687	17	1	other enzyme activity
AT3G23175	20	0.13	kinase activity
AT3G23175	25	0.11	other binding
AT3G23175	18	0.1	transferase activity
AT3G23175	19	0.08	hydrolase activity
AT3G23175	24	0.1	other molecular functions
AT3G23175	27	0.02	protein binding
AT3G23175	26	0.01	receptor binding or activity
AT3G23175	23	0.02	nucleotide binding
AT3G23175	29	0.06	structural molecule activity
AT3G23175	32	0.06	transcription factor activity
AT3G23175	22	0.07	DNA or RNA binding
AT3G23175	31	0.09	nucleic acid binding
AT3G23175	17	0.09	other enzyme activity
AT3G23175	21	0.06	transporter activity
AT1G15420	29	1	structural molecule activity
AT3G60400	19	0.06	hydrolase activity
AT3G60400	17	0.94	other enzyme activity
AT4G01920	17	1	other enzyme activity
AT1G35617	19	0.09	hydrolase activity
AT1G35617	24	0.91	other molecular functions
AT5G08630	22	1	DNA or RNA binding
AT1G18380	17	1	other enzyme activity
AT2G47310	22	1	DNA or RNA binding
AT4G01790	29	1	structural molecule activity
AT1G12790	19	1	hydrolase activity
AT1G66740	23	1	nucleotide binding
AT1G74250	29	1	structural molecule activity
AT1G56060	25	0.02	other binding
AT1G56060	17	0.98	other enzyme activity
AT1G78410	25	0.77	other binding
AT1G78410	23	0.02	nucleotide binding
AT1G78410	17	0.21	other enzyme activity
AT1G25500	17	1	other enzyme activity
AT5G19120	19	1	hydrolase activity
AT3G04480	29	1	structural molecule activity
AT1G65690	17	1	other enzyme activity
AT3G62840	22	1	DNA or RNA binding
AT1G31780	23	1	nucleotide binding
AT5G15580	23	1	nucleotide binding
AT1G12520	18	1	transferase activity
AT3G01890	22	1	DNA or RNA binding
AT5G58230	23	1	nucleotide binding
AT3G06460	23	0.9	nucleotide binding
AT3G06460	21	0.1	transporter activity
AT3G27280	29	1	structural molecule activity
AT3G04610	22	1	DNA or RNA binding
AT5G09530	17	1	other enzyme activity
AT4G24550	23	1	nucleotide binding
AT1G73330	17	1	other enzyme activity
AT1G27470	29	1	structural molecule activity
AT5G06630	19	0.01	hydrolase activity
AT5G06630	29	0.03	structural molecule activity
AT5G06630	21	0.96	transporter activity
AT2G24980	19	0.01	hydrolase activity
AT2G24980	29	0.03	structural molecule activity
AT2G24980	21	0.96	transporter activity
AT2G20790	23	1	nucleotide binding
AT1G64450	25	0.77	other binding
AT1G64450	24	0.23	other molecular functions
AT1G70060	23	1	nucleotide binding
AT3G05270	25	0.02	other binding
AT3G05270	19	0.47	hydrolase activity
AT3G05270	27	0.42	protein binding
AT3G05270	23	0.04	nucleotide binding
AT3G05270	17	0.05	other enzyme activity
AT1G21680	19	1	hydrolase activity
AT3G48800	25	0.03	other binding
AT3G48800	18	0.07	transferase activity
AT3G48800	19	0.06	hydrolase activity
AT3G48800	24	0.02	other molecular functions
AT3G48800	27	0.04	protein binding
AT3G48800	26	0.01	receptor binding or activity
AT3G48800	23	0.06	nucleotide binding
AT3G48800	29	0.03	structural molecule activity
AT3G48800	32	0.03	transcription factor activity
AT3G48800	22	0.09	DNA or RNA binding
AT3G48800	31	0.05	nucleic acid binding
AT3G48800	17	0.19	other enzyme activity
AT3G48800	21	0.32	transporter activity
AT2G42780	22	1	DNA or RNA binding
AT1G73040	17	1	other enzyme activity
AT5G41970	29	1	structural molecule activity
AT4G19880	17	1	other enzyme activity
AT5G23740	29	1	structural molecule activity
AT1G12640	17	1	other enzyme activity
AT5G16200	17	1	other enzyme activity
AT2G34357	29	1	structural molecule activity
AT2G23130	17	1	other enzyme activity
AT5G14600	29	1	structural molecule activity
AT2G03870	22	1	DNA or RNA binding
AT1G43810	17	1	other enzyme activity
AT3G08000	22	1	DNA or RNA binding
AT3G07050	29	1	structural molecule activity
AT1G57600	17	1	other enzyme activity
AT1G60710	17	1	other enzyme activity
AT1G06640	17	1	other enzyme activity
AT3G18790	22	1	DNA or RNA binding
AT3G54590	19	0.01	hydrolase activity
AT3G54590	29	0.03	structural molecule activity
AT3G54590	21	0.96	transporter activity
AT1G04980	17	1	other enzyme activity
AT4G10040	17	1	other enzyme activity
AT4G07410	29	1	structural molecule activity
AT3G28550	19	0.01	hydrolase activity
AT3G28550	29	0.03	structural molecule activity
AT3G28550	21	0.96	transporter activity
AT4G02330	17	1	other enzyme activity
AT2G13650	29	1	structural molecule activity
AT5G45600	23	0.7	nucleotide binding
AT5G45600	22	0.3	DNA or RNA binding
AT1G20440	17	1	other enzyme activity
AT1G80190	23	0.25	nucleotide binding
AT1G80190	22	0.75	DNA or RNA binding
AT4G08400	19	0.01	hydrolase activity
AT4G08400	29	0.03	structural molecule activity
AT4G08400	21	0.96	transporter activity
AT1G42440	29	1	structural molecule activity
AT1G03370	20	0.01	kinase activity
AT1G03370	19	0.5	hydrolase activity
AT1G03370	23	0.01	nucleotide binding
AT1G03370	17	0.48	other enzyme activity
AT1G01930	17	1	other enzyme activity
AT1G07400	17	1	other enzyme activity
AT1G70590	17	1	other enzyme activity
AT4G22150	17	1	other enzyme activity
AT1G63050	17	1	other enzyme activity
AT2G28650	23	1	nucleotide binding
AT3G20800	23	1	nucleotide binding
AT1G73570	23	1	nucleotide binding
AT3G54580	19	0.01	hydrolase activity
AT3G54580	29	0.03	structural molecule activity
AT3G54580	21	0.96	transporter activity
AT1G32340	25	1	other binding
AT1G77050	29	1	structural molecule activity
AT5G12860	29	1	structural molecule activity
AT4G34270	29	1	structural molecule activity
AT3G11450	29	1	structural molecule activity
AT2G39320	19	1	hydrolase activity
AT2G47010	17	1	other enzyme activity
AT4G32175	29	1	structural molecule activity
AT2G31040	17	1	other enzyme activity
AT2G02870	25	0.01	other binding
AT2G02870	19	0.01	hydrolase activity
AT2G02870	17	0.98	other enzyme activity
AT1G22040	25	0.01	other binding
AT1G22040	19	0.01	hydrolase activity
AT1G22040	17	0.98	other enzyme activity
AT1G26090	23	1	nucleotide binding
AT1G23720	19	0.01	hydrolase activity
AT1G23720	29	0.03	structural molecule activity
AT1G23720	21	0.96	transporter activity
AT4G12600	29	1	structural molecule activity
AT1G55270	25	0.01	other binding
AT1G55270	19	0.01	hydrolase activity
AT1G55270	17	0.98	other enzyme activity
AT3G07590	22	1	DNA or RNA binding
AT3G29130	17	1	other enzyme activity
AT4G02840	22	1	DNA or RNA binding
AT1G76870	17	1	other enzyme activity
AT3G24900	17	1	other enzyme activity
AT3G17910	17	1	other enzyme activity
AT2G47115	29	1	structural molecule activity
AT2G18290	19	1	hydrolase activity
AT2G32090	17	1	other enzyme activity
AT5G03220	29	1	structural molecule activity
ATMG00810	20	0.29	kinase activity
ATMG00810	25	0.03	other binding
ATMG00810	18	0.09	transferase activity
ATMG00810	19	0.08	hydrolase activity
ATMG00810	24	0.06	other molecular functions
ATMG00810	27	0.1	protein binding
ATMG00810	26	0.08	receptor binding or activity
ATMG00810	23	0.09	nucleotide binding
ATMG00810	32	0.01	transcription factor activity
ATMG00810	22	0.04	DNA or RNA binding
ATMG00810	31	0.02	nucleic acid binding
ATMG00810	17	0.06	other enzyme activity
ATMG00810	21	0.05	transporter activity
AT4G20220	20	0.29	kinase activity
AT4G20220	25	0.03	other binding
AT4G20220	18	0.09	transferase activity
AT4G20220	19	0.08	hydrolase activity
AT4G20220	24	0.06	other molecular functions
AT4G20220	27	0.1	protein binding
AT4G20220	26	0.08	receptor binding or activity
AT4G20220	23	0.09	nucleotide binding
AT4G20220	32	0.01	transcription factor activity
AT4G20220	22	0.04	DNA or RNA binding
AT4G20220	31	0.02	nucleic acid binding
AT4G20220	17	0.06	other enzyme activity
AT4G20220	21	0.05	transporter activity
AT2G18245	20	0.1	kinase activity
AT2G18245	25	0.04	other binding
AT2G18245	18	0.03	transferase activity
AT2G18245	19	0.07	hydrolase activity
AT2G18245	24	0.06	other molecular functions
AT2G18245	27	0.06	protein binding
AT2G18245	26	0.07	receptor binding or activity
AT2G18245	23	0.07	nucleotide binding
AT2G18245	29	0.06	structural molecule activity
AT2G18245	32	0.09	transcription factor activity
AT2G18245	22	0.14	DNA or RNA binding
AT2G18245	31	0.08	nucleic acid binding
AT2G18245	17	0.08	other enzyme activity
AT2G18245	21	0.05	transporter activity
AT1G10657	20	0.08	kinase activity
AT1G10657	25	0.09	other binding
AT1G10657	18	0.12	transferase activity
AT1G10657	19	0.07	hydrolase activity
AT1G10657	24	0.02	other molecular functions
AT1G10657	27	0.03	protein binding
AT1G10657	26	0.06	receptor binding or activity
AT1G10657	23	0.1	nucleotide binding
AT1G10657	29	0.08	structural molecule activity
AT1G10657	32	0.06	transcription factor activity
AT1G10657	22	0.03	DNA or RNA binding
AT1G10657	31	0.08	nucleic acid binding
AT1G10657	17	0.06	other enzyme activity
AT1G10657	21	0.12	transporter activity
AT3G16640	29	1	structural molecule activity
AT1G27060	23	1	nucleotide binding
AT3G12480	22	1	DNA or RNA binding
AT5G42010	23	1	nucleotide binding
AT3G61710	23	1	nucleotide binding
AT1G26665	29	1	structural molecule activity
AT1G06670	23	1	nucleotide binding
AT1G14620	29	1	structural molecule activity
AT3G58180	29	1	structural molecule activity
AT3G19020	23	0.77	nucleotide binding
AT3G19020	29	0.15	structural molecule activity
AT3G19020	17	0.08	other enzyme activity
AT4G24130	17	1	other enzyme activity
AT1G20690	17	1	other enzyme activity
AT5G59240	29	1	structural molecule activity
AT3G06760	19	1	hydrolase activity
AT5G41820	19	1	hydrolase activity
AT3G25010	17	1	other enzyme activity
AT5G61330	29	1	structural molecule activity
AT1G71360	29	1	structural molecule activity
AT1G22882	29	1	structural molecule activity
AT2G25280	17	1	other enzyme activity
AT2G28880	17	1	other enzyme activity
AT4G17270	23	1	nucleotide binding
AT1G44120	25	1	other binding
AT1G61080	19	0.01	hydrolase activity
AT1G61080	29	0.03	structural molecule activity
AT1G61080	21	0.96	transporter activity
AT5G06160	22	1	DNA or RNA binding
AT4G09950	23	0.63	nucleotide binding
AT4G09950	29	0.37	structural molecule activity
AT5G50960	19	1	hydrolase activity
AT3G51310	23	1	nucleotide binding
AT3G56570	29	1	structural molecule activity
AT5G10070	29	1	structural molecule activity
AT2G27200	29	1	structural molecule activity
AT3G52270	22	1	DNA or RNA binding
AT5G66630	23	1	nucleotide binding
AT1G68610	17	1	other enzyme activity
AT5G61150	22	1	DNA or RNA binding
AT3G58580	23	1	nucleotide binding
AT5G03500	29	1	structural molecule activity
AT1G02450	17	1	other enzyme activity
AT4G00990	32	1	transcription factor activity
AT4G00700	17	1	other enzyme activity
AT3G57940	29	1	structural molecule activity
AT3G25470	18	1	transferase activity
AT3G04640	25	0.99	other binding
AT3G04640	32	0.01	transcription factor activity
AT1G59860	17	1	other enzyme activity
AT1G49040	20	0.09	kinase activity
AT1G49040	25	0.05	other binding
AT1G49040	18	0.04	transferase activity
AT1G49040	19	0.1	hydrolase activity
AT1G49040	24	0.04	other molecular functions
AT1G49040	27	0.06	protein binding
AT1G49040	26	0.03	receptor binding or activity
AT1G49040	23	0.07	nucleotide binding
AT1G49040	29	0.04	structural molecule activity
AT1G49040	32	0.02	transcription factor activity
AT1G49040	22	0.24	DNA or RNA binding
AT1G49040	31	0.03	nucleic acid binding
AT1G49040	17	0.12	other enzyme activity
AT1G49040	21	0.07	transporter activity
AT3G26500	17	1	other enzyme activity
AT5G27700	29	1	structural molecule activity
AT5G36270	18	0.04	transferase activity
AT5G36270	17	0.96	other enzyme activity
AT5G08600	29	1	structural molecule activity
AT3G50130	19	0.01	hydrolase activity
AT3G50130	29	0.03	structural molecule activity
AT3G50130	21	0.96	transporter activity
AT1G03530	29	1	structural molecule activity
AT4G14000	29	1	structural molecule activity
AT3G14050	19	1	hydrolase activity
AT1G30060	17	1	other enzyme activity
AT3G09800	29	1	structural molecule activity
AT3G26740	17	1	other enzyme activity
AT2G21260	17	1	other enzyme activity
AT5G66620	23	1	nucleotide binding
AT2G03667	17	1	other enzyme activity
AT2G39050	17	1	other enzyme activity
AT4G11790	23	1	nucleotide binding
AT3G12390	29	1	structural molecule activity
AT5G17270	29	1	structural molecule activity
AT4G28940	17	1	other enzyme activity
AT3G14080	22	1	DNA or RNA binding
AT4G31520	29	1	structural molecule activity
AT4G18900	29	1	structural molecule activity
AT2G19260	25	0.04	other binding
AT2G19260	22	0.96	DNA or RNA binding
AT1G69380	23	1	nucleotide binding
AT2G26810	29	1	structural molecule activity
AT1G06460	17	1	other enzyme activity
AT3G57000	29	1	structural molecule activity
AT4G38930	17	1	other enzyme activity
AT1G17690	29	1	structural molecule activity
AT1G78460	25	1	other binding
AT5G19970	17	1	other enzyme activity
AT3G59810	22	1	DNA or RNA binding
AT4G08520	29	1	structural molecule activity
AT2G43810	22	1	DNA or RNA binding
AT1G62840	17	1	other enzyme activity
AT3G06890	17	1	other enzyme activity
AT2G16060	20	0.03	kinase activity
AT2G16060	25	0.03	other binding
AT2G16060	18	0.05	transferase activity
AT2G16060	19	0.01	hydrolase activity
AT2G16060	26	0.02	receptor binding or activity
AT2G16060	23	0.1	nucleotide binding
AT2G16060	29	0.02	structural molecule activity
AT2G16060	32	0.04	transcription factor activity
AT2G16060	22	0.29	DNA or RNA binding
AT2G16060	31	0.01	nucleic acid binding
AT2G16060	17	0.06	other enzyme activity
AT2G16060	21	0.34	transporter activity
AT1G15380	17	1	other enzyme activity
AT4G16660	27	1	protein binding
AT5G03340	23	1	nucleotide binding
AT4G18230	17	1	other enzyme activity
AT4G18593	29	1	structural molecule activity
AT1G29395	17	1	other enzyme activity
AT2G37510	22	1	DNA or RNA binding
AT1G52380	23	1	nucleotide binding
AT4G00540	29	1	structural molecule activity
AT3G15970	23	1	nucleotide binding
AT1G12470	23	1	nucleotide binding
AT3G44190	17	1	other enzyme activity
AT4G01560	29	1	structural molecule activity
AT5G43720	29	1	structural molecule activity
AT2G22100	22	1	DNA or RNA binding
AT3G13230	29	1	structural molecule activity
AT2G29780	25	0.01	other binding
AT2G29780	19	0.01	hydrolase activity
AT2G29780	17	0.98	other enzyme activity
AT1G17330	17	1	other enzyme activity
AT4G22310	17	1	other enzyme activity
AT2G27650	17	1	other enzyme activity
AT1G71270	23	1	nucleotide binding
AT2G19560	22	1	DNA or RNA binding
AT1G13330	18	1	transferase activity
AT1G47500	22	1	DNA or RNA binding
AT1G14260	17	1	other enzyme activity
AT2G17250	29	1	structural molecule activity
AT5G03900	17	1	other enzyme activity
AT4G39870	20	0.48	kinase activity
AT4G39870	18	0.11	transferase activity
AT4G39870	23	0.41	nucleotide binding
AT3G26900	17	1	other enzyme activity
AT2G36260	17	1	other enzyme activity
AT2G05590	20	0.36	kinase activity
AT2G05590	18	0.11	transferase activity
AT2G05590	19	0.06	hydrolase activity
AT2G05590	27	0.01	protein binding
AT2G05590	23	0.41	nucleotide binding
AT2G05590	29	0.01	structural molecule activity
AT2G05590	22	0.03	DNA or RNA binding
AT2G05590	17	0.01	other enzyme activity
AT1G54070	20	0.1	kinase activity
AT1G54070	25	0.03	other binding
AT1G54070	18	0.11	transferase activity
AT1G54070	19	0.03	hydrolase activity
AT1G54070	24	0.06	other molecular functions
AT1G54070	27	0.02	protein binding
AT1G54070	26	0.04	receptor binding or activity
AT1G54070	23	0.1	nucleotide binding
AT1G54070	29	0.06	structural molecule activity
AT1G54070	32	0.09	transcription factor activity
AT1G54070	22	0.09	DNA or RNA binding
AT1G54070	31	0.08	nucleic acid binding
AT1G54070	17	0.11	other enzyme activity
AT1G54070	21	0.08	transporter activity
AT1G33265	17	1	other enzyme activity
AT1G31440	17	1	other enzyme activity
AT1G25988	25	0.02	other binding
AT1G25988	17	0.98	other enzyme activity
AT1G08005	29	1	structural molecule activity
AT1G01820	17	1	other enzyme activity
AT1G12970	17	1	other enzyme activity
AT2G32700	23	1	nucleotide binding
AT1G78955	17	1	other enzyme activity
AT5G06260	20	0.36	kinase activity
AT5G06260	18	0.11	transferase activity
AT5G06260	19	0.06	hydrolase activity
AT5G06260	27	0.01	protein binding
AT5G06260	23	0.41	nucleotide binding
AT5G06260	29	0.01	structural molecule activity
AT5G06260	22	0.03	DNA or RNA binding
AT5G06260	17	0.01	other enzyme activity
AT4G34070	20	0.36	kinase activity
AT4G34070	18	0.11	transferase activity
AT4G34070	19	0.06	hydrolase activity
AT4G34070	27	0.01	protein binding
AT4G34070	23	0.41	nucleotide binding
AT4G34070	29	0.01	structural molecule activity
AT4G34070	22	0.03	DNA or RNA binding
AT4G34070	17	0.01	other enzyme activity
AT3G53800	17	1	other enzyme activity
AT3G09380	23	1	nucleotide binding
AT1G19730	17	1	other enzyme activity
AT5G19300	29	1	structural molecule activity
AT2G19990	17	1	other enzyme activity
AT3G50580	21	1	transporter activity
AT5G62600	23	1	nucleotide binding
AT4G19810	17	1	other enzyme activity
AT5G17930	29	1	structural molecule activity
AT3G09210	29	1	structural molecule activity
AT1G61000	23	1	nucleotide binding
AT4G20330	22	1	DNA or RNA binding
AT2G44640	17	1	other enzyme activity
AT2G30400	17	1	other enzyme activity
AT2G36940	17	1	other enzyme activity
AT2G33410	22	1	DNA or RNA binding
AT1G61150	23	1	nucleotide binding
AT1G11110	23	1	nucleotide binding
AT3G60570	17	1	other enzyme activity
AT1G18630	22	1	DNA or RNA binding
AT1G11780	23	1	nucleotide binding
AT1G49600	29	1	structural molecule activity
AT1G75690	17	1	other enzyme activity
AT2G17790	23	1	nucleotide binding
AT1G76300	22	1	DNA or RNA binding
AT3G44120	19	0.02	hydrolase activity
AT3G44120	24	0.02	other molecular functions
AT3G44120	32	0.91	transcription factor activity
AT3G44120	22	0.05	DNA or RNA binding
AT2G07140	19	0.02	hydrolase activity
AT2G07140	24	0.02	other molecular functions
AT2G07140	32	0.91	transcription factor activity
AT2G07140	22	0.05	DNA or RNA binding
AT2G18740	22	1	DNA or RNA binding
AT2G43450	17	1	other enzyme activity
AT1G17790	22	1	DNA or RNA binding
AT1G17370	22	1	DNA or RNA binding
AT2G47240	17	1	other enzyme activity
AT1G73230	29	1	structural molecule activity
AT4G36850	17	1	other enzyme activity
AT2G17705	17	1	other enzyme activity
AT1G30580	29	1	structural molecule activity
AT4G10480	29	1	structural molecule activity
AT4G22550	19	0.85	hydrolase activity
AT4G22550	17	0.15	other enzyme activity
AT1G17880	29	1	structural molecule activity
AT4G28820	19	0.01	hydrolase activity
AT4G28820	23	0.58	nucleotide binding
AT4G28820	17	0.41	other enzyme activity
AT1G31160	17	1	other enzyme activity
AT4G21220	18	1	transferase activity
AT2G29500	17	1	other enzyme activity
AT1G66680	29	1	structural molecule activity
AT2G33330	17	1	other enzyme activity
AT3G51660	17	1	other enzyme activity
AT4G20100	22	0.61	DNA or RNA binding
AT4G20100	17	0.39	other enzyme activity
AT4G30220	22	1	DNA or RNA binding
AT2G41050	22	0.61	DNA or RNA binding
AT2G41050	17	0.39	other enzyme activity
AT1G13930	17	1	other enzyme activity
AT1G21120	17	1	other enzyme activity
AT5G19750	17	1	other enzyme activity
AT2G38860	17	1	other enzyme activity
AT2G45700	25	0.03	other binding
AT2G45700	18	0.07	transferase activity
AT2G45700	19	0.06	hydrolase activity
AT2G45700	24	0.02	other molecular functions
AT2G45700	27	0.04	protein binding
AT2G45700	26	0.01	receptor binding or activity
AT2G45700	23	0.06	nucleotide binding
AT2G45700	29	0.03	structural molecule activity
AT2G45700	32	0.03	transcription factor activity
AT2G45700	22	0.09	DNA or RNA binding
AT2G45700	31	0.05	nucleic acid binding
AT2G45700	17	0.19	other enzyme activity
AT2G45700	21	0.32	transporter activity
AT1G69210	19	0.05	hydrolase activity
AT1G69210	23	0.95	nucleotide binding
AT5G30495	29	1	structural molecule activity
AT1G33890	23	1	nucleotide binding
AT1G33040	29	1	structural molecule activity
AT4G39890	23	1	nucleotide binding
AT1G31010	22	1	DNA or RNA binding
AT1G78950	17	1	other enzyme activity
AT1G49150	17	1	other enzyme activity
AT1G06710	23	0.25	nucleotide binding
AT1G06710	17	0.75	other enzyme activity
AT4G29440	20	1	kinase activity
AT4G34412	22	1	DNA or RNA binding
AT3G17120	17	1	other enzyme activity
AT2G25730	20	0.03	kinase activity
AT2G25730	25	0.03	other binding
AT2G25730	18	0.05	transferase activity
AT2G25730	19	0.01	hydrolase activity
AT2G25730	26	0.02	receptor binding or activity
AT2G25730	23	0.1	nucleotide binding
AT2G25730	29	0.02	structural molecule activity
AT2G25730	32	0.04	transcription factor activity
AT2G25730	22	0.29	DNA or RNA binding
AT2G25730	31	0.01	nucleic acid binding
AT2G25730	17	0.06	other enzyme activity
AT2G25730	21	0.34	transporter activity
AT1G53280	17	1	other enzyme activity
AT2G23930	29	1	structural molecule activity
AT1G10300	29	1	structural molecule activity
AT2G18690	17	1	other enzyme activity
ATCG00830	29	1	structural molecule activity
AT4G23070	20	0.74	kinase activity
AT4G23070	18	0.26	transferase activity
AT1G54390	25	0.04	other binding
AT1G54390	22	0.96	DNA or RNA binding
AT1G22330	22	1	DNA or RNA binding
AT2G04550	19	1	hydrolase activity
AT4G30260	23	1	nucleotide binding
AT2G18840	23	1	nucleotide binding
AT4G15410	17	1	other enzyme activity
AT3G05280	23	1	nucleotide binding
AT1G65990	17	1	other enzyme activity
AT1G68230	25	0.41	other binding
AT1G68230	19	0.01	hydrolase activity
AT1G68230	23	0.39	nucleotide binding
AT1G68230	17	0.19	other enzyme activity
AT2G36300	23	1	nucleotide binding
AT4G28660	17	1	other enzyme activity
AT5G02050	29	0.17	structural molecule activity
AT5G02050	22	0.83	DNA or RNA binding
AT3G15450	17	1	other enzyme activity
AT3G12530	23	1	nucleotide binding
AT2G42220	17	1	other enzyme activity
AT3G52760	23	1	nucleotide binding
AT2G18660	17	1	other enzyme activity
AT5G05210	29	1	structural molecule activity
AT4G27000	22	1	DNA or RNA binding
AT2G39805	23	1	nucleotide binding
AT2G14610	17	1	other enzyme activity
AT3G45140	25	0.96	other binding
AT3G45140	17	0.04	other enzyme activity
AT2G22170	25	0.96	other binding
AT2G22170	17	0.04	other enzyme activity
AT1G55390	17	1	other enzyme activity
AT2G46780	22	1	DNA or RNA binding
AT1G80490	23	1	nucleotide binding
AT3G62560	23	1	nucleotide binding
ATCG01230	29	1	structural molecule activity
ATCG00905	29	1	structural molecule activity
AT3G18190	29	1	structural molecule activity
AT1G54580	17	1	other enzyme activity
AT5G01410	17	1	other enzyme activity
AT5G40670	17	1	other enzyme activity
AT4G07390	22	0.62	DNA or RNA binding
AT4G07390	17	0.38	other enzyme activity
AT3G26085	19	0.05	hydrolase activity
AT3G26085	17	0.95	other enzyme activity
AT3G06180	29	1	structural molecule activity
AT3G05100	18	1	transferase activity
AT2G39725	29	0.01	structural molecule activity
AT2G39725	17	0.99	other enzyme activity
AT2G26200	18	1	transferase activity
AT2G20725	19	0.05	hydrolase activity
AT2G20725	17	0.95	other enzyme activity
AT2G03140	19	0.05	hydrolase activity
AT2G03140	17	0.95	other enzyme activity
AT1G76065	29	0.01	structural molecule activity
AT1G76065	17	0.99	other enzyme activity
AT1G76060	29	0.01	structural molecule activity
AT1G76060	17	0.99	other enzyme activity
AT1G29120	19	1	hydrolase activity
AT1G24267	20	0.03	kinase activity
AT1G24267	25	0.04	other binding
AT1G24267	18	0.1	transferase activity
AT1G24267	19	0.06	hydrolase activity
AT1G24267	24	0.06	other molecular functions
AT1G24267	27	0.07	protein binding
AT1G24267	26	0.04	receptor binding or activity
AT1G24267	23	0.09	nucleotide binding
AT1G24267	29	0.06	structural molecule activity
AT1G24267	32	0.17	transcription factor activity
AT1G24267	22	0.14	DNA or RNA binding
AT1G24267	31	0.08	nucleic acid binding
AT1G24267	17	0.01	other enzyme activity
AT1G24267	21	0.05	transporter activity
AT1G24265	20	0.03	kinase activity
AT1G24265	25	0.04	other binding
AT1G24265	18	0.1	transferase activity
AT1G24265	19	0.06	hydrolase activity
AT1G24265	24	0.06	other molecular functions
AT1G24265	27	0.07	protein binding
AT1G24265	26	0.04	receptor binding or activity
AT1G24265	23	0.09	nucleotide binding
AT1G24265	29	0.06	structural molecule activity
AT1G24265	32	0.17	transcription factor activity
AT1G24265	22	0.14	DNA or RNA binding
AT1G24265	31	0.08	nucleic acid binding
AT1G24265	17	0.01	other enzyme activity
AT1G24265	21	0.05	transporter activity
AT1G14270	17	1	other enzyme activity
AT1G13590	25	0.35	other binding
AT1G13590	17	0.65	other enzyme activity
AT1G12060	19	0.03	hydrolase activity
AT1G12060	24	0.01	other molecular functions
AT1G12060	27	0.88	protein binding
AT1G12060	32	0.03	transcription factor activity
AT1G12060	31	0.01	nucleic acid binding
AT1G12060	17	0.04	other enzyme activity
AT1G11230	17	1	other enzyme activity
AT1G11210	17	1	other enzyme activity
AT1G09980	17	1	other enzyme activity
AT1G80210	19	0.87	hydrolase activity
AT1G80210	22	0.13	DNA or RNA binding
AT3G06820	19	0.87	hydrolase activity
AT3G06820	22	0.13	DNA or RNA binding
AT4G10110	22	1	DNA or RNA binding
AT2G32500	17	1	other enzyme activity
AT3G23080	17	1	other enzyme activity
AT5G20570	19	1	hydrolase activity
AT1G07990	29	1	structural molecule activity
AT4G29520	17	1	other enzyme activity
AT1G80500	23	0.98	nucleotide binding
AT1G80500	29	0.02	structural molecule activity
AT1G76170	29	1	structural molecule activity
AT2G36930	29	1	structural molecule activity
AT1G51160	23	0.98	nucleotide binding
AT1G51160	29	0.02	structural molecule activity
AT1G80440	17	1	other enzyme activity
AT1G71300	23	1	nucleotide binding
ATMG00080	29	1	structural molecule activity
AT1G14570	17	1	other enzyme activity
AT2G28820	29	1	structural molecule activity
AT1G27430	25	0.04	other binding
AT1G27430	22	0.96	DNA or RNA binding
AT1G24300	25	0.04	other binding
AT1G24300	22	0.96	DNA or RNA binding
AT3G15280	17	1	other enzyme activity
AT5G14170	22	1	DNA or RNA binding
AT2G28420	17	1	other enzyme activity
AT3G09580	17	1	other enzyme activity
AT2G07785	17	1	other enzyme activity
AT3G08810	25	0.01	other binding
AT3G08810	19	0.01	hydrolase activity
AT3G08810	17	0.98	other enzyme activity
AT1G14880	17	1	other enzyme activity
AT1G14870	17	1	other enzyme activity
AT5G18490	17	1	other enzyme activity
AT3G05670	25	1	other binding
AT5G20600	29	1	structural molecule activity
AT4G38780	22	1	DNA or RNA binding
AT5G01780	17	1	other enzyme activity
AT1G55330	17	1	other enzyme activity
AT1G71280	29	1	structural molecule activity
AT1G52800	17	1	other enzyme activity
AT2G31305	17	1	other enzyme activity
AT5G03415	23	0.51	nucleotide binding
AT5G03415	22	0.49	DNA or RNA binding
AT2G28400	17	1	other enzyme activity
AT1G50670	19	1	hydrolase activity
AT2G24020	17	1	other enzyme activity
AT1G06560	20	1	kinase activity
AT3G60450	17	1	other enzyme activity
AT1G76690	17	1	other enzyme activity
ATCG00780	29	1	structural molecule activity
AT1G32210	22	1	DNA or RNA binding
AT5G17440	22	1	DNA or RNA binding
AT4G02450	17	1	other enzyme activity
ATCG01300	29	1	structural molecule activity
AT4G03450	17	1	other enzyme activity
AT3G03773	17	1	other enzyme activity
AT1G75850	23	1	nucleotide binding
AT2G29070	17	1	other enzyme activity
AT3G16050	17	1	other enzyme activity
AT3G06470	23	0.55	nucleotide binding
AT3G06470	21	0.45	transporter activity
ATCG00810	29	1	structural molecule activity
AT5G26180	20	1	kinase activity
AT1G28395	29	1	structural molecule activity
AT3G26360	21	1	transporter activity
AT2G33110	27	0.08	protein binding
AT2G33110	23	0.92	nucleotide binding
AT3G24880	23	1	nucleotide binding
AT1G53790	17	1	other enzyme activity
ATMG01275	17	1	other enzyme activity
AT1G12600	21	1	transporter activity
AT4G31600	21	1	transporter activity
AT4G23010	21	1	transporter activity
AT1G54770	29	1	structural molecule activity
AT1G76010	29	1	structural molecule activity
AT1G29250	29	1	structural molecule activity
AT1G20220	29	1	structural molecule activity
AT2G29020	19	1	hydrolase activity
AT5G14730	17	1	other enzyme activity
AT5G26700	24	1	other molecular functions
AT1G03890	24	1	other molecular functions
AT1G03880	24	1	other molecular functions
AT1G02335	24	1	other molecular functions
AT1G35550	29	1	structural molecule activity
AT3G55070	23	1	nucleotide binding
AT4G20520	18	0.57	transferase activity
AT4G20520	22	0.43	DNA or RNA binding
AT2G16480	22	1	DNA or RNA binding
ATCG00790	29	1	structural molecule activity
ATCG00750	29	1	structural molecule activity
AT5G41910	29	1	structural molecule activity
AT2G33090	22	1	DNA or RNA binding
AT2G32820	22	1	DNA or RNA binding
AT2G27780	22	1	DNA or RNA binding
AT2G13640	22	1	DNA or RNA binding
AT1G06470	21	1	transporter activity
AT5G53000	29	1	structural molecule activity
AT2G19830	23	1	nucleotide binding
AT1G11660	27	1	protein binding
AT3G05790	19	0.01	hydrolase activity
AT3G05790	23	0.99	nucleotide binding
AT1G67650	29	1	structural molecule activity
AT1G23465	19	1	hydrolase activity
AT1G63530	17	1	other enzyme activity
AT4G17620	29	1	structural molecule activity
AT5G55450	17	1	other enzyme activity
AT2G20430	24	1	other molecular functions
AT1G61795	24	1	other molecular functions
AT2G17120	17	1	other enzyme activity
AT2G18090	25	0.04	other binding
AT2G18090	22	0.96	DNA or RNA binding
AT4G30650	17	1	other enzyme activity
AT1G78660	17	1	other enzyme activity
AT2G32650	17	1	other enzyme activity
AT2G32180	17	1	other enzyme activity
AT1G74900	22	0.01	DNA or RNA binding
AT1G74900	17	0.99	other enzyme activity
AT2G15910	29	1	structural molecule activity
AT2G17190	25	1	other binding
AT1G02410	17	1	other enzyme activity
AT3G54210	29	1	structural molecule activity
AT2G32720	17	1	other enzyme activity
AT2G17200	25	1	other binding
AT3G14280	17	1	other enzyme activity
ATMG00980	29	1	structural molecule activity
AT3G15690	17	1	other enzyme activity
AT1G03240	17	1	other enzyme activity
AT1G03200	17	1	other enzyme activity
ATCG01040	17	1	other enzyme activity
ATCG00770	29	1	structural molecule activity
AT3G05780	19	0.01	hydrolase activity
AT3G05780	23	0.99	nucleotide binding
AT3G01800	18	1	transferase activity
AT1G52670	17	1	other enzyme activity
AT2G14890	25	0.01	other binding
AT2G14890	23	0.02	nucleotide binding
AT2G14890	29	0.15	structural molecule activity
AT2G14890	17	0.82	other enzyme activity
AT2G38000	23	1	nucleotide binding
AT5G58770	18	1	transferase activity
AT5G26940	19	1	hydrolase activity
AT1G24490	23	1	nucleotide binding
AT2G24170	23	1	nucleotide binding
AT5G58780	18	1	transferase activity
AT5G64830	29	1	structural molecule activity
AT1G27750	22	1	DNA or RNA binding
AT2G23400	18	1	transferase activity
AT3G29430	18	0.85	transferase activity
AT3G29430	17	0.15	other enzyme activity
AT5G50310	25	0.01	other binding
AT5G50310	19	0.01	hydrolase activity
AT5G50310	17	0.98	other enzyme activity
AT2G18620	18	0.82	transferase activity
AT2G18620	17	0.18	other enzyme activity
AT5G47040	19	0.01	hydrolase activity
AT5G47040	23	0.99	nucleotide binding
AT3G14510	18	0.85	transferase activity
AT3G14510	17	0.15	other enzyme activity
AT5G58782	18	1	transferase activity
AT3G32040	18	0.85	transferase activity
AT3G32040	17	0.15	other enzyme activity
AT4G32915	17	1	other enzyme activity
AT5G02280	23	0.98	nucleotide binding
AT5G02280	29	0.02	structural molecule activity
AT1G67620	17	1	other enzyme activity
AT4G38460	18	0.85	transferase activity
AT4G38460	17	0.15	other enzyme activity
AT2G20860	17	1	other enzyme activity
AT2G47350	19	0.01	hydrolase activity
AT2G47350	23	0.58	nucleotide binding
AT2G47350	17	0.41	other enzyme activity
AT3G06660	19	0.01	hydrolase activity
AT3G06660	23	0.58	nucleotide binding
AT3G06660	17	0.41	other enzyme activity
AT5G58784	18	1	transferase activity
AT5G49370	25	0.06	other binding
AT5G49370	24	0.94	other molecular functions
AT5G05520	18	1	transferase activity
AT4G09080	17	1	other enzyme activity
AT3G62630	25	0.01	other binding
AT3G62630	17	0.99	other enzyme activity
AT3G54570	27	1	protein binding
AT3G44160	17	1	other enzyme activity
AT3G30240	18	0.02	transferase activity
AT3G30240	19	0.01	hydrolase activity
AT3G30240	27	0.02	protein binding
AT3G30240	26	0.31	receptor binding or activity
AT3G30240	23	0.27	nucleotide binding
AT3G30240	29	0.01	structural molecule activity
AT3G30240	32	0.02	transcription factor activity
AT3G30240	31	0.01	nucleic acid binding
AT3G30240	17	0.31	other enzyme activity
AT3G30240	21	0.02	transporter activity
AT3G27880	25	0.01	other binding
AT3G27880	17	0.99	other enzyme activity
AT3G15380	19	0.85	hydrolase activity
AT3G15380	17	0.15	other enzyme activity
AT3G11070	18	1	transferase activity
AT3G04440	19	0.85	hydrolase activity
AT3G04440	17	0.15	other enzyme activity
AT3G03700	19	0.85	hydrolase activity
AT3G03700	17	0.15	other enzyme activity
AT2G32310	23	0.01	nucleotide binding
AT2G32310	17	0.99	other enzyme activity
AT2G26530	25	0.01	other binding
AT2G26530	17	0.99	other enzyme activity
AT2G15760	25	0.01	other binding
AT2G15760	17	0.99	other enzyme activity
AT2G05530	24	0.01	other molecular functions
AT2G05530	17	0.99	other enzyme activity
AT2G05520	24	0.01	other molecular functions
AT2G05520	17	0.99	other enzyme activity
AT2G05510	24	0.01	other molecular functions
AT2G05510	17	0.99	other enzyme activity
AT2G05440	24	0.01	other molecular functions
AT2G05440	17	0.99	other enzyme activity
AT2G05380	17	1	other enzyme activity
AT1G75550	24	0.01	other molecular functions
AT1G75550	17	0.99	other enzyme activity
AT1G70420	17	1	other enzyme activity
AT1G61160	18	0.02	transferase activity
AT1G61160	19	0.01	hydrolase activity
AT1G61160	27	0.02	protein binding
AT1G61160	26	0.31	receptor binding or activity
AT1G61160	23	0.27	nucleotide binding
AT1G61160	29	0.01	structural molecule activity
AT1G61160	32	0.02	transcription factor activity
AT1G61160	31	0.01	nucleic acid binding
AT1G61160	17	0.31	other enzyme activity
AT1G61160	21	0.02	transporter activity
AT1G51560	23	0.01	nucleotide binding
AT1G51560	17	0.99	other enzyme activity
AT1G51450	22	1	DNA or RNA binding
AT1G41860	18	0.02	transferase activity
AT1G41860	19	0.01	hydrolase activity
AT1G41860	27	0.02	protein binding
AT1G41860	26	0.31	receptor binding or activity
AT1G41860	23	0.27	nucleotide binding
AT1G41860	29	0.01	structural molecule activity
AT1G41860	32	0.02	transcription factor activity
AT1G41860	31	0.01	nucleic acid binding
AT1G41860	17	0.31	other enzyme activity
AT1G41860	21	0.02	transporter activity
AT1G36550	18	0.02	transferase activity
AT1G36550	19	0.01	hydrolase activity
AT1G36550	27	0.02	protein binding
AT1G36550	26	0.31	receptor binding or activity
AT1G36550	23	0.27	nucleotide binding
AT1G36550	29	0.01	structural molecule activity
AT1G36550	32	0.02	transcription factor activity
AT1G36550	31	0.01	nucleic acid binding
AT1G36550	17	0.31	other enzyme activity
AT1G36550	21	0.02	transporter activity
AT1G35860	17	1	other enzyme activity
AT1G23710	25	0.06	other binding
AT1G23710	17	0.94	other enzyme activity
ATMG00090	29	1	structural molecule activity
AT2G23410	18	1	transferase activity
AT1G76825	29	1	structural molecule activity
AT2G03690	17	1	other enzyme activity
AT2G26930	18	1	transferase activity
AT2G39340	29	1	structural molecule activity
AT2G17740	17	1	other enzyme activity
ATCG00760	29	1	structural molecule activity
AT5G37130	29	1	structural molecule activity
AT4G20440	22	1	DNA or RNA binding
AT1G50480	29	1	structural molecule activity
AT1G68370	23	1	nucleotide binding
AT5G60500	18	1	transferase activity
AT2G42080	23	1	nucleotide binding
AT1G43670	17	1	other enzyme activity
AT5G45010	19	1	hydrolase activity
AT2G32350	27	0.82	protein binding
AT2G32350	22	0.18	DNA or RNA binding
AT5G18820	27	1	protein binding
AT5G60510	18	1	transferase activity
AT1G66960	17	1	other enzyme activity
AT3G09310	23	1	nucleotide binding
ATCG01310	29	1	structural molecule activity
AT1G04130	29	1	structural molecule activity
AT1G32920	25	0.06	other binding
AT1G32920	17	0.94	other enzyme activity
AT5G45020	17	1	other enzyme activity
AT1G30130	18	0.81	transferase activity
AT1G30130	17	0.19	other enzyme activity
AT2G17570	18	1	transferase activity
AT3G13020	18	0.01	transferase activity
AT3G13020	27	0.14	protein binding
AT3G13020	23	0.73	nucleotide binding
AT3G13020	22	0.12	DNA or RNA binding
AT1G36095	18	0.01	transferase activity
AT1G36095	27	0.14	protein binding
AT1G36095	23	0.73	nucleotide binding
AT1G36095	22	0.12	DNA or RNA binding
AT4G19700	17	1	other enzyme activity
AT2G12290	17	1	other enzyme activity
AT4G05210	18	1	transferase activity
AT3G45020	29	1	structural molecule activity
AT3G29639	22	1	DNA or RNA binding
AT1G58080	17	1	other enzyme activity
AT1G07615	23	0.5	nucleotide binding
AT1G07615	29	0.5	structural molecule activity
AT2G04900	17	1	other enzyme activity
AT1G56300	17	1	other enzyme activity
AT1G49380	17	1	other enzyme activity
AT1G69680	23	1	nucleotide binding
AT1G63550	20	0.63	kinase activity
AT1G63550	23	0.37	nucleotide binding
AT1G56460	23	0.29	nucleotide binding
AT1G56460	17	0.71	other enzyme activity
AT5G16540	31	1	nucleic acid binding
AT3G02830	31	1	nucleic acid binding
AT3G14200	25	1	other binding
AT1G32780	25	1	other binding
AT2G46470	21	1	transporter activity
AT5G40530	29	1	structural molecule activity
AT1G47580	17	1	other enzyme activity
AT1G61640	17	1	other enzyme activity
AT2G32170	17	1	other enzyme activity
AT2G35680	19	1	hydrolase activity
AT2G21090	25	0.07	other binding
AT2G21090	23	0.01	nucleotide binding
AT2G21090	17	0.92	other enzyme activity
AT2G42530	17	1	other enzyme activity
AT5G43680	17	1	other enzyme activity
AT1G22440	25	0.01	other binding
AT1G22440	17	0.99	other enzyme activity
AT3G56880	20	0.01	kinase activity
AT3G56880	25	0.77	other binding
AT3G56880	19	0.04	hydrolase activity
AT3G56880	24	0.01	other molecular functions
AT3G56880	27	0.01	protein binding
AT3G56880	26	0.01	receptor binding or activity
AT3G56880	23	0.07	nucleotide binding
AT3G56880	32	0.03	transcription factor activity
AT3G56880	31	0.01	nucleic acid binding
AT3G56880	17	0.03	other enzyme activity
AT3G56880	21	0.01	transporter activity
AT2G37790	17	1	other enzyme activity
AT5G02880	29	1	structural molecule activity
AT3G28750	20	0.03	kinase activity
AT3G28750	25	0.03	other binding
AT3G28750	18	0.05	transferase activity
AT3G28750	19	0.01	hydrolase activity
AT3G28750	26	0.02	receptor binding or activity
AT3G28750	23	0.1	nucleotide binding
AT3G28750	29	0.02	structural molecule activity
AT3G28750	32	0.04	transcription factor activity
AT3G28750	22	0.29	DNA or RNA binding
AT3G28750	31	0.01	nucleic acid binding
AT3G28750	17	0.06	other enzyme activity
AT3G28750	21	0.34	transporter activity
AT5G21090	17	1	other enzyme activity
AT3G54380	22	1	DNA or RNA binding
AT3G01200	17	1	other enzyme activity
AT2G35720	23	1	nucleotide binding
AT4G16120	17	1	other enzyme activity
AT5G23330	17	1	other enzyme activity
AT3G12930	17	1	other enzyme activity
AT3G04500	23	1	nucleotide binding
AT1G11390	17	1	other enzyme activity
AT5G09570	29	1	structural molecule activity
AT1G69750	29	0.95	structural molecule activity
AT1G69750	17	0.05	other enzyme activity
AT1G66590	29	0.95	structural molecule activity
AT1G66590	17	0.05	other enzyme activity
AT5G23395	29	0.95	structural molecule activity
AT5G23395	17	0.05	other enzyme activity
AT3G62780	25	0.81	other binding
AT3G62780	27	0.01	protein binding
AT3G62780	29	0.18	structural molecule activity
AT2G10560	25	0.3	other binding
AT2G10560	17	0.7	other enzyme activity
AT5G49910	29	1	structural molecule activity
AT1G18600	20	0.74	kinase activity
AT1G18600	18	0.07	transferase activity
AT1G18600	19	0.13	hydrolase activity
AT1G18600	17	0.06	other enzyme activity
AT5G57590	18	1	transferase activity
AT3G03490	23	0.29	nucleotide binding
AT3G03490	17	0.71	other enzyme activity
AT2G21350	19	0.99	hydrolase activity
AT2G21350	23	0.01	nucleotide binding
AT2G20990	25	0.81	other binding
AT2G20990	29	0.19	structural molecule activity
AT3G25130	19	1	hydrolase activity
AT3G48770	18	0.01	transferase activity
AT3G48770	27	0.14	protein binding
AT3G48770	23	0.73	nucleotide binding
AT3G48770	22	0.12	DNA or RNA binding
AT3G17450	18	0.01	transferase activity
AT3G17450	27	0.58	protein binding
AT3G17450	23	0.01	nucleotide binding
AT3G17450	22	0.4	DNA or RNA binding
AT2G30660	17	1	other enzyme activity
AT1G71000	23	1	nucleotide binding
AT1G65230	17	1	other enzyme activity
AT5G10840	23	1	nucleotide binding
AT3G46500	17	1	other enzyme activity
AT1G73800	17	1	other enzyme activity
AT1G27530	29	1	structural molecule activity
AT3G18110	29	1	structural molecule activity
AT1G78510	17	1	other enzyme activity
AT2G30650	17	1	other enzyme activity
AT2G26800	17	1	other enzyme activity
AT1G70985	17	1	other enzyme activity
AT1G67460	20	1	kinase activity
AT1G42480	17	1	other enzyme activity
AT1G06060	23	1	nucleotide binding
AT4G38640	19	0.85	hydrolase activity
AT4G38640	17	0.15	other enzyme activity
AT2G42650	29	1	structural molecule activity
AT5G40770	29	1	structural molecule activity
AT3G24190	18	0.46	transferase activity
AT3G24190	17	0.54	other enzyme activity
AT1G15990	23	1	nucleotide binding
AT1G62970	17	1	other enzyme activity
AT2G29700	25	1	other binding
AT1G77730	25	1	other binding
AT5G56090	17	1	other enzyme activity
AT1G73480	19	1	hydrolase activity
AT1G18360	19	1	hydrolase activity
AT5G38900	17	1	other enzyme activity
AT2G18465	23	1	nucleotide binding
AT1G09070	25	0.81	other binding
AT1G09070	27	0.01	protein binding
AT1G09070	29	0.18	structural molecule activity
AT1G15780	25	0.91	other binding
AT1G15780	23	0.09	nucleotide binding
AT4G33100	17	1	other enzyme activity
AT4G11260	17	1	other enzyme activity
AT1G20080	25	0.81	other binding
AT1G20080	27	0.01	protein binding
AT1G20080	29	0.18	structural molecule activity
AT1G23840	17	1	other enzyme activity
AT1G62040	17	1	other enzyme activity
AT4G04340	17	1	other enzyme activity
AT2G36145	17	1	other enzyme activity
AT3G09670	29	1	structural molecule activity
AT1G18500	17	1	other enzyme activity
AT2G38905	17	1	other enzyme activity
AT3G06170	17	1	other enzyme activity
AT1G06450	23	1	nucleotide binding
AT1G18100	17	1	other enzyme activity
AT4G23570	17	1	other enzyme activity
AT2G31955	17	1	other enzyme activity
AT5G40720	17	1	other enzyme activity
AT4G37420	17	1	other enzyme activity
AT4G20170	17	1	other enzyme activity
AT4G17650	17	1	other enzyme activity
AT4G01883	25	0.09	other binding
AT4G01883	17	0.91	other enzyme activity
AT4G01650	25	0.09	other binding
AT4G01650	17	0.91	other enzyme activity
AT4G00695	27	1	protein binding
AT4G00650	20	0.07	kinase activity
AT4G00650	25	0.05	other binding
AT4G00650	18	0.05	transferase activity
AT4G00650	24	0.05	other molecular functions
AT4G00650	27	0.02	protein binding
AT4G00650	23	0.03	nucleotide binding
AT4G00650	29	0.03	structural molecule activity
AT4G00650	32	0.02	transcription factor activity
AT4G00650	22	0.04	DNA or RNA binding
AT4G00650	31	0.08	nucleic acid binding
AT4G00650	17	0.49	other enzyme activity
AT4G00650	21	0.07	transporter activity
AT3G62130	17	1	other enzyme activity
AT3G07380	17	1	other enzyme activity
AT2G33570	17	1	other enzyme activity
AT2G16760	17	1	other enzyme activity
AT2G01410	17	1	other enzyme activity
AT2G01070	19	0.04	hydrolase activity
AT2G01070	23	0.6	nucleotide binding
AT2G01070	29	0.36	structural molecule activity
AT1G80245	27	1	protein binding
AT1G72480	19	0.04	hydrolase activity
AT1G72480	23	0.6	nucleotide binding
AT1G72480	29	0.36	structural molecule activity
AT1G67780	22	1	DNA or RNA binding
AT1G67270	25	0.04	other binding
AT1G67270	22	0.96	DNA or RNA binding
AT1G61670	19	0.04	hydrolase activity
AT1G61670	23	0.6	nucleotide binding
AT1G61670	29	0.36	structural molecule activity
AT1G53470	22	0.15	DNA or RNA binding
AT1G53470	21	0.85	transporter activity
AT1G27200	17	1	other enzyme activity
AT1G10980	19	0.04	hydrolase activity
AT1G10980	23	0.6	nucleotide binding
AT1G10980	29	0.36	structural molecule activity
AT1G02475	25	0.09	other binding
AT1G02475	17	0.91	other enzyme activity
AT1G02470	25	0.09	other binding
AT1G02470	17	0.91	other enzyme activity
AT1G02160	29	0.95	structural molecule activity
AT1G02160	17	0.05	other enzyme activity
AT1G67850	17	1	other enzyme activity
AT2G38140	17	1	other enzyme activity
AT1G27030	17	1	other enzyme activity
AT1G75040	17	1	other enzyme activity
AT1G51580	22	1	DNA or RNA binding
AT5G27720	22	1	DNA or RNA binding
AT1G30515	23	1	nucleotide binding
AT1G55805	17	1	other enzyme activity
AT2G20230	17	1	other enzyme activity
AT3G27330	17	1	other enzyme activity
AT1G76860	22	1	DNA or RNA binding
AT1G22080	20	0.01	kinase activity
AT1G22080	25	0.47	other binding
AT1G22080	27	0.01	protein binding
AT1G22080	23	0.01	nucleotide binding
AT1G22080	17	0.49	other enzyme activity
AT1G22080	21	0.01	transporter activity
AT1G21190	22	1	DNA or RNA binding
AT1G35470	23	1	nucleotide binding
AT2G45270	17	1	other enzyme activity
AT2G44150	18	1	transferase activity
AT4G30620	17	1	other enzyme activity
AT1G72160	21	1	transporter activity
AT2G17880	23	1	nucleotide binding
AT2G19380	22	1	DNA or RNA binding
AT2G43760	17	1	other enzyme activity
AT2G27775	17	1	other enzyme activity
AT4G10130	29	1	structural molecule activity
AT5G09850	22	1	DNA or RNA binding
AT1G65950	18	0.46	transferase activity
AT1G65950	17	0.54	other enzyme activity
AT2G16780	23	1	nucleotide binding
AT4G30330	22	1	DNA or RNA binding
AT2G24540	25	0.01	other binding
AT2G24540	19	0.01	hydrolase activity
AT2G24540	17	0.98	other enzyme activity
AT3G11500	22	1	DNA or RNA binding
AT3G02720	17	1	other enzyme activity
AT1G80480	17	1	other enzyme activity
AT1G26520	23	1	nucleotide binding
AT3G13672	25	0.43	other binding
AT3G13672	23	0.37	nucleotide binding
AT3G13672	17	0.2	other enzyme activity
AT5G01300	17	1	other enzyme activity
AT4G20370	17	1	other enzyme activity
AT2G27550	17	1	other enzyme activity
AT1G48530	19	1	hydrolase activity
AT3G07700	18	0.46	transferase activity
AT3G07700	17	0.54	other enzyme activity
AT3G59690	18	0.03	transferase activity
AT3G59690	17	0.97	other enzyme activity
AT4G19580	23	1	nucleotide binding
AT3G12550	25	0.01	other binding
AT3G12550	19	0.06	hydrolase activity
AT3G12550	27	0.86	protein binding
AT3G12550	26	0.02	receptor binding or activity
AT3G12550	22	0.01	DNA or RNA binding
AT3G12550	17	0.03	other enzyme activity
AT3G12550	21	0.01	transporter activity
AT1G80790	25	0.01	other binding
AT1G80790	19	0.06	hydrolase activity
AT1G80790	27	0.86	protein binding
AT1G80790	26	0.02	receptor binding or activity
AT1G80790	22	0.01	DNA or RNA binding
AT1G80790	17	0.03	other enzyme activity
AT1G80790	21	0.01	transporter activity
AT1G13790	25	0.01	other binding
AT1G13790	19	0.06	hydrolase activity
AT1G13790	27	0.86	protein binding
AT1G13790	26	0.02	receptor binding or activity
AT1G13790	22	0.01	DNA or RNA binding
AT1G13790	17	0.03	other enzyme activity
AT1G13790	21	0.01	transporter activity
AT5G38690	25	0.02	other binding
AT5G38690	22	0.98	DNA or RNA binding
AT2G42700	21	1	transporter activity
AT2G14285	22	1	DNA or RNA binding
AT4G35050	23	1	nucleotide binding
AT5G19820	29	1	structural molecule activity
AT4G09350	23	1	nucleotide binding
AT1G55210	17	1	other enzyme activity
AT1G15790	17	1	other enzyme activity
AT5G59370	23	0.59	nucleotide binding
AT5G59370	29	0.41	structural molecule activity
AT4G12640	22	1	DNA or RNA binding
AT2G25640	22	1	DNA or RNA binding
AT1G11950	32	1	transcription factor activity
AT1G62310	32	1	transcription factor activity
AT3G20930	22	1	DNA or RNA binding
AT5G22760	25	0.04	other binding
AT5G22760	22	0.96	DNA or RNA binding
AT1G78300	23	1	nucleotide binding
AT3G23480	17	1	other enzyme activity
AT5G11100	29	1	structural molecule activity
AT5G04220	29	1	structural molecule activity
AT1G11930	17	1	other enzyme activity
AT5G04340	32	1	transcription factor activity
AT2G22670	17	1	other enzyme activity
AT5G05200	17	1	other enzyme activity
AT3G58620	25	1	other binding
AT4G14730	17	1	other enzyme activity
AT2G01870	17	1	other enzyme activity
AT4G09340	23	1	nucleotide binding
AT4G09310	23	1	nucleotide binding
AT4G09200	23	1	nucleotide binding
AT4G26860	17	1	other enzyme activity
AT2G26540	17	1	other enzyme activity
AT3G49730	23	1	nucleotide binding
AT1G54320	23	1	nucleotide binding
AT5G05440	20	0.03	kinase activity
AT5G05440	25	0.13	other binding
AT5G05440	18	0.05	transferase activity
AT5G05440	19	0.03	hydrolase activity
AT5G05440	24	0.03	other molecular functions
AT5G05440	26	0.02	receptor binding or activity
AT5G05440	23	0.07	nucleotide binding
AT5G05440	29	0.05	structural molecule activity
AT5G05440	32	0.04	transcription factor activity
AT5G05440	22	0.06	DNA or RNA binding
AT5G05440	31	0.07	nucleic acid binding
AT5G05440	17	0.38	other enzyme activity
AT5G05440	21	0.04	transporter activity
AT5G45110	25	0.43	other binding
AT5G45110	23	0.37	nucleotide binding
AT5G45110	17	0.2	other enzyme activity
AT3G63150	23	1	nucleotide binding
AT1G17050	17	1	other enzyme activity
AT1G64750	19	1	hydrolase activity
AT1G67680	29	1	structural molecule activity
AT2G27690	17	1	other enzyme activity
AT3G54600	17	1	other enzyme activity
AT3G53880	17	1	other enzyme activity
AT3G15390	17	1	other enzyme activity
AT4G09000	23	0.51	nucleotide binding
AT4G09000	17	0.49	other enzyme activity
AT1G35160	23	0.51	nucleotide binding
AT1G35160	17	0.49	other enzyme activity
AT1G54410	17	1	other enzyme activity
AT1G70400	22	1	DNA or RNA binding
AT1G64740	23	0.6	nucleotide binding
AT1G64740	29	0.4	structural molecule activity
AT5G07570	25	0.28	other binding
AT5G07570	18	0.43	transferase activity
AT5G07570	17	0.29	other enzyme activity
AT4G32360	17	1	other enzyme activity
AT5G11010	29	1	structural molecule activity
AT1G65700	22	1	DNA or RNA binding
AT4G09300	23	1	nucleotide binding
AT2G41760	25	1	other binding
AT5G27060	17	1	other enzyme activity
AT3G50480	17	1	other enzyme activity
AT4G26430	19	0.87	hydrolase activity
AT4G26430	22	0.13	DNA or RNA binding
AT2G05250	23	1	nucleotide binding
AT2G05230	23	1	nucleotide binding
AT3G17160	22	1	DNA or RNA binding
AT2G15970	17	1	other enzyme activity
AT5G24810	17	1	other enzyme activity
AT1G09180	23	1	nucleotide binding
AT4G22380	29	1	structural molecule activity
AT2G38020	23	1	nucleotide binding
AT1G27100	19	1	hydrolase activity
AT5G40080	29	1	structural molecule activity
AT5G39800	29	1	structural molecule activity
AT2G34680	17	1	other enzyme activity
AT3G23460	18	0.81	transferase activity
AT3G23460	17	0.19	other enzyme activity
AT3G62460	29	1	structural molecule activity
AT2G01650	23	1	nucleotide binding
AT1G75530	20	0.76	kinase activity
AT1G75530	19	0.19	hydrolase activity
AT1G75530	23	0.05	nucleotide binding
AT5G15020	23	1	nucleotide binding
AT1G08410	29	1	structural molecule activity
AT3G54350	20	0.76	kinase activity
AT3G54350	19	0.19	hydrolase activity
AT3G54350	23	0.05	nucleotide binding
AT3G20550	20	0.76	kinase activity
AT3G20550	19	0.19	hydrolase activity
AT3G20550	23	0.05	nucleotide binding
AT2G21530	20	0.76	kinase activity
AT2G21530	19	0.19	hydrolase activity
AT2G21530	23	0.05	nucleotide binding
AT1G25400	25	0.06	other binding
AT1G25400	17	0.94	other enzyme activity
AT5G44500	22	1	DNA or RNA binding
AT3G46230	17	1	other enzyme activity
AT4G00231	19	0.38	hydrolase activity
AT4G00231	21	0.62	transporter activity
AT3G01320	23	1	nucleotide binding
AT3G10160	17	1	other enzyme activity
AT5G63550	22	1	DNA or RNA binding
AT5G55660	22	1	DNA or RNA binding
AT5G06480	17	1	other enzyme activity
AT4G32160	25	1	other binding
AT3G48195	25	1	other binding
AT3G44100	17	1	other enzyme activity
AT3G43660	20	0.04	kinase activity
AT3G43660	25	0.02	other binding
AT3G43660	18	0.08	transferase activity
AT3G43660	19	0.07	hydrolase activity
AT3G43660	24	0.12	other molecular functions
AT3G43660	27	0.05	protein binding
AT3G43660	26	0.06	receptor binding or activity
AT3G43660	23	0.02	nucleotide binding
AT3G43660	29	0.04	structural molecule activity
AT3G43660	32	0.02	transcription factor activity
AT3G43660	22	0.05	DNA or RNA binding
AT3G43660	31	0.03	nucleic acid binding
AT3G43660	17	0.06	other enzyme activity
AT3G43660	21	0.34	transporter activity
AT3G43630	20	0.04	kinase activity
AT3G43630	25	0.02	other binding
AT3G43630	18	0.08	transferase activity
AT3G43630	19	0.07	hydrolase activity
AT3G43630	24	0.12	other molecular functions
AT3G43630	27	0.05	protein binding
AT3G43630	26	0.06	receptor binding or activity
AT3G43630	23	0.02	nucleotide binding
AT3G43630	29	0.04	structural molecule activity
AT3G43630	32	0.02	transcription factor activity
AT3G43630	22	0.05	DNA or RNA binding
AT3G43630	31	0.03	nucleic acid binding
AT3G43630	17	0.06	other enzyme activity
AT3G43630	21	0.34	transporter activity
AT3G25190	20	0.04	kinase activity
AT3G25190	25	0.02	other binding
AT3G25190	18	0.08	transferase activity
AT3G25190	19	0.07	hydrolase activity
AT3G25190	24	0.12	other molecular functions
AT3G25190	27	0.05	protein binding
AT3G25190	26	0.06	receptor binding or activity
AT3G25190	23	0.02	nucleotide binding
AT3G25190	29	0.04	structural molecule activity
AT3G25190	32	0.02	transcription factor activity
AT3G25190	22	0.05	DNA or RNA binding
AT3G25190	31	0.03	nucleic acid binding
AT3G25190	17	0.06	other enzyme activity
AT3G25190	21	0.34	transporter activity
AT3G18295	20	0.04	kinase activity
AT3G18295	25	0.11	other binding
AT3G18295	18	0.09	transferase activity
AT3G18295	19	0.05	hydrolase activity
AT3G18295	24	0.11	other molecular functions
AT3G18295	27	0.13	protein binding
AT3G18295	26	0.04	receptor binding or activity
AT3G18295	23	0.01	nucleotide binding
AT3G18295	29	0.1	structural molecule activity
AT3G18295	32	0.06	transcription factor activity
AT3G18295	22	0.05	DNA or RNA binding
AT3G18295	31	0.05	nucleic acid binding
AT3G18295	17	0.12	other enzyme activity
AT3G18295	21	0.04	transporter activity
AT3G14750	23	0.29	nucleotide binding
AT3G14750	17	0.71	other enzyme activity
AT3G11780	17	1	other enzyme activity
AT3G06110	19	1	hydrolase activity
AT2G26370	17	1	other enzyme activity
AT2G24470	20	0.01	kinase activity
AT2G24470	25	0.02	other binding
AT2G24470	19	0.45	hydrolase activity
AT2G24470	24	0.02	other molecular functions
AT2G24470	27	0.41	protein binding
AT2G24470	23	0.03	nucleotide binding
AT2G24470	29	0.01	structural molecule activity
AT2G24470	17	0.05	other enzyme activity
AT2G23360	20	0.01	kinase activity
AT2G23360	25	0.02	other binding
AT2G23360	19	0.45	hydrolase activity
AT2G23360	24	0.02	other molecular functions
AT2G23360	27	0.41	protein binding
AT2G23360	23	0.03	nucleotide binding
AT2G23360	29	0.01	structural molecule activity
AT2G23360	17	0.05	other enzyme activity
AT2G21490	17	1	other enzyme activity
AT2G16005	17	1	other enzyme activity
AT2G13070	20	0.03	kinase activity
AT2G13070	25	0.08	other binding
AT2G13070	18	0.14	transferase activity
AT2G13070	19	0.06	hydrolase activity
AT2G13070	24	0.21	other molecular functions
AT2G13070	27	0.08	protein binding
AT2G13070	26	0.06	receptor binding or activity
AT2G13070	23	0.08	nucleotide binding
AT2G13070	29	0.06	structural molecule activity
AT2G13070	32	0.04	transcription factor activity
AT2G13070	22	0.05	DNA or RNA binding
AT2G13070	31	0.06	nucleic acid binding
AT2G13070	17	0.02	other enzyme activity
AT2G13070	21	0.03	transporter activity
AT1G77630	20	1	kinase activity
AT1G77580	20	0.01	kinase activity
AT1G77580	25	0.02	other binding
AT1G77580	19	0.45	hydrolase activity
AT1G77580	24	0.02	other molecular functions
AT1G77580	27	0.41	protein binding
AT1G77580	23	0.03	nucleotide binding
AT1G77580	29	0.01	structural molecule activity
AT1G77580	17	0.05	other enzyme activity
AT1G76800	20	0.04	kinase activity
AT1G76800	25	0.02	other binding
AT1G76800	18	0.08	transferase activity
AT1G76800	19	0.07	hydrolase activity
AT1G76800	24	0.12	other molecular functions
AT1G76800	27	0.05	protein binding
AT1G76800	26	0.06	receptor binding or activity
AT1G76800	23	0.02	nucleotide binding
AT1G76800	29	0.04	structural molecule activity
AT1G76800	32	0.02	transcription factor activity
AT1G76800	22	0.05	DNA or RNA binding
AT1G76800	31	0.03	nucleic acid binding
AT1G76800	17	0.06	other enzyme activity
AT1G76800	21	0.34	transporter activity
AT1G68340	20	0.04	kinase activity
AT1G68340	25	0.11	other binding
AT1G68340	18	0.09	transferase activity
AT1G68340	19	0.05	hydrolase activity
AT1G68340	24	0.11	other molecular functions
AT1G68340	27	0.13	protein binding
AT1G68340	26	0.04	receptor binding or activity
AT1G68340	23	0.01	nucleotide binding
AT1G68340	29	0.1	structural molecule activity
AT1G68340	32	0.06	transcription factor activity
AT1G68340	22	0.05	DNA or RNA binding
AT1G68340	31	0.05	nucleic acid binding
AT1G68340	17	0.12	other enzyme activity
AT1G68340	21	0.04	transporter activity
AT1G55000	20	1	kinase activity
AT1G45015	17	1	other enzyme activity
AT1G43870	20	0.03	kinase activity
AT1G43870	25	0.08	other binding
[truncated: 19,122 more rows]
